# Supplementary material for: Anemia prevalence in women of reproductive age in low- and middle-income countries between 2000 and 2018
Source: PubMed Central journal article supplement (PMC8516651; doi:10.1038/s41591-021-01498-0), 2021-10-12
Supplement: 41591_2021_1498_MOESM1_ESM.pdf [file 41591_2021_1498_MOESM1_ESM.pdf]

---

**Supplementary information**

---

**Anemia prevalence in women of  
reproductive age in low- and middle-  
income countries between 2000 and 2018**

---

In the format provided by the  
authors and unedited

1 **Supplementary Information**

2

3 **Contents**

4 **Supplementary Figures** ..... 2

5 **Supplementary Tables** ..... 3

6 1.0 GATHER compliance ..... 4

7 2.0 Supplementary data ..... 6

8 3.0 Supplementary covariates ..... 20

9 **4.0 Supplementary methods** ..... 24

10 4.1 Geostatistical model ..... 24

11 **5.0 Model result** ..... 26

12 **6.0 Model validation** ..... 174

13 6.1 Anaemia validation metrics ..... 174

14 6.2 Anaemia sensitivity analysis ..... 180

15 7.0 Supplementary references ..... 182

16

17

|    |                                                                                                             |     |
|----|-------------------------------------------------------------------------------------------------------------|-----|
| 18 | <b>Supplementary Figures</b>                                                                                |     |
| 19 | <b>Supplementary Figure 1: Anaemia data availability by type and country, 1998–2018, in Africa</b>          | 13  |
| 20 | <b>Supplementary Figure 2: Anaemia data availability by type and country, 1998–2018, in Central</b>         |     |
| 21 | <b>America and the Caribbean and South America</b>                                                          | 14  |
| 22 | <b>Supplementary Figure 3: Anaemia data availability by type and country, 1998–2018, in Southeast Asia.</b> |     |
| 23 | .....                                                                                                       | 15  |
| 24 | <b>Supplementary Figure 4: Anaemia data availability by type and country, 1998–2018, in South Asia</b>      | 16  |
| 25 | <b>Supplementary Figure 5: Anaemia data availability by type and country, 1998–2018, in Middle East</b>     |     |
| 26 | <b>and Central Asia</b>                                                                                     | 17  |
| 27 | <b>Supplementary Figure 6: Years of data informing administrative level one units</b>                       | 18  |
| 28 | <b>Supplementary Figure 7: Years of data informing administrative level two units</b>                       | 19  |
| 29 | <b>Supplementary Figure 8: Covariates</b>                                                                   | 23  |
| 30 | <b>Supplementary Figure 9: Finite elements mesh</b>                                                         | 25  |
| 31 | <b>Supplementary Figure 10: Anaemia posterior means and upper and lower 95% uncertainty intervals</b>       |     |
| 32 | .....                                                                                                       | 167 |
| 33 | <b>Supplementary Figure 11: Mild anaemia posterior means and upper and lower 95% uncertainty</b>            |     |
| 34 | <b>intervals</b>                                                                                            | 168 |
| 35 | <b>Supplementary Figure 12: Moderate anaemia posterior means and upper and lower 95% uncertainty</b>        |     |
| 36 | <b>intervals</b>                                                                                            | 169 |
| 37 | <b>Supplementary Figure 13: Severe anaemia posterior means and upper and lower 95% uncertainty</b>          |     |
| 38 | <b>intervals</b>                                                                                            | 170 |
| 39 | <b>Supplementary Figure 14: Prevalence for overall anaemia among WRA in 2018, and probability of</b>        |     |
| 40 | <b>achieving the WHO GNT for overall anaemia by 2018</b>                                                    | 171 |
| 41 | <b>Supplementary Figure 15: Prevalence for overall anaemia among WRA in 2025, and probability of</b>        |     |
| 42 | <b>achieving the WHO GNT for overall anaemia by 2025</b>                                                    | 172 |
| 43 | <b>Supplementary Figure 16: Overlapping population-weighted quartiles of overall anaemia and relative</b>   |     |
| 44 | <b>95% uncertainty in 2018</b>                                                                              | 173 |
| 45 | <b>Supplementary Figure 17: Anaemia admin 0 aggregation in-sample</b>                                       | 177 |
| 46 | <b>Supplementary Figure 18: Anaemia admin 1 aggregation in-sample</b>                                       | 178 |
| 47 | <b>Supplementary Figure 19: Anaemia admin 2 aggregation in-sample</b>                                       | 179 |
| 48 | <b>Supplementary Figure 20: Sensitivity analysis results admin 1 level</b>                                  | 180 |
| 49 | <b>Supplementary Figure 21: Sensitivity analysis results admin 2 level</b>                                  | 181 |
| 50 |                                                                                                             |     |
| 51 |                                                                                                             |     |
| 52 |                                                                                                             |     |
| 53 |                                                                                                             |     |
| 54 |                                                                                                             |     |

|    |                                                                                                                                 |     |
|----|---------------------------------------------------------------------------------------------------------------------------------|-----|
| 55 | <b>Supplementary Tables</b>                                                                                                     |     |
| 56 | <b>Supplementary Table 1: Guidelines for Accurate and Transparent Health Estimates Reporting</b>                                |     |
| 57 | <b>(GATHER) checklist</b> .....                                                                                                 | 4   |
| 58 | <b>Supplementary Table 2: Summary of data source geographical resolution, and haemoglobin</b>                                   |     |
| 59 | <b>assessment methods</b> .....                                                                                                 | 6   |
| 60 | <b>Supplementary Table 3: The low- and middle-income countries included in model of prevalence of</b>                           |     |
| 61 | <b>anaemia from 2000 to 2018</b> .....                                                                                          | 7   |
| 62 | <b>Supplementary Table 4: The low- and middle-income countries excluded in model of prevalence of</b>                           |     |
| 63 | <b>anaemia from 2000 to 2018</b> .....                                                                                          | 10  |
| 64 | <b>Supplementary Table 5: Altitude adjustment to measured haemoglobin concentrations<sup>37</sup></b> .....                     | 11  |
| 65 | <b>Supplementary Table 6<sup>24</sup>: Smoking status adjustments to measured haemoglobin concentrations<sup>37</sup></b> ..... | 11  |
| 66 | <b>Supplementary Table 7: Smoking and elevation adjusted haemoglobin level definitions to diagnose anaemia</b>                  |     |
| 67 | <b>(g/L)<sup>37</sup></b> .....                                                                                                 | 12  |
| 68 | <b>Supplementary Table 8: Covariates used in mapping</b> .....                                                                  | 20  |
| 69 | <b>Supplementary Table 9: Spatial hyperparameter priors by region</b> .....                                                     | 24  |
| 70 | <b>Supplementary Table 10: Widest absolute inequalities between subnational districts in 2000 and 2018</b>                      |     |
| 71 | .....                                                                                                                           | 26  |
| 72 | <b>Supplementary Table 11: Widest relative inequalities: LMICs with districts deviating <math>\geq 50\%</math> from the</b>     |     |
| 73 | <b>national mean in 2000 and 2018</b> .....                                                                                     | 27  |
| 74 | <b>Supplementary Table 12: Shifts in the number of WRA with anaemia by districts in 2000 and 2018</b> ... 28                    |     |
| 75 | <b>Supplementary Table 13: LMICs with extreme differences in their rates of change across subnational</b>                       |     |
| 76 | <b>districts</b> .....                                                                                                          | 29  |
| 77 | <b>Supplementary Table 14: Countries and administrative units achieving the WHO GNT of reducing</b>                             |     |
| 78 | <b>anaemia prevalence among WRA by 50% prevalence by 2018 and 2030 (with a baseline year of 2012)</b>                           |     |
| 79 | <b>with high probability (&gt;95%).</b> .....                                                                                   | 30  |
| 80 | <b>Supplementary Table 15: Anaemia fitted parameters</b> .....                                                                  | 165 |
| 81 | <b>Supplementary Table 16: Predictive metrics for anaemia aggregated to admin 0</b> .....                                       | 174 |
| 82 | <b>Supplementary Table 17: Predictive metrics for anaemia aggregated to admin 1</b> .....                                       | 175 |
| 83 | <b>Supplementary Table 18: Predictive metrics for anaemia aggregated to admin 2</b> .....                                       | 176 |
| 84 |                                                                                                                                 |     |
| 85 |                                                                                                                                 |     |
| 86 |                                                                                                                                 |     |
| 87 |                                                                                                                                 |     |
| 88 |                                                                                                                                 |     |
| 89 |                                                                                                                                 |     |
| 90 |                                                                                                                                 |     |
| 91 |                                                                                                                                 |     |

92 **1.0 GATHER compliance**  
 93 **Supplementary Table 1: Guidelines for Accurate and Transparent Health Estimates Reporting**  
 94 **(GATHER) checklist**

| Item #                                                                                                | Checklist item                                                                                                                                                                                                                                                                                                                                | Reported on page #                                                                                        |
|-------------------------------------------------------------------------------------------------------|-----------------------------------------------------------------------------------------------------------------------------------------------------------------------------------------------------------------------------------------------------------------------------------------------------------------------------------------------|-----------------------------------------------------------------------------------------------------------|
| <b>Objectives and funding</b>                                                                         |                                                                                                                                                                                                                                                                                                                                               |                                                                                                           |
| <b>1</b>                                                                                              | Define the indicator(s), populations (including age, sex, and geographic entities), and time period(s) for which estimates were made.                                                                                                                                                                                                         | Main text: Introduction, Methods (Data)                                                                   |
| <b>2</b>                                                                                              | List the funding sources for the work.                                                                                                                                                                                                                                                                                                        | Main text: Acknowledgments                                                                                |
| <b>Data Inputs</b>                                                                                    |                                                                                                                                                                                                                                                                                                                                               |                                                                                                           |
| <i>For all data inputs from multiple sources that are synthesized as part of the study:</i>           |                                                                                                                                                                                                                                                                                                                                               |                                                                                                           |
| <b>3</b>                                                                                              | Describe how the data were identified and how the data were accessed.                                                                                                                                                                                                                                                                         | Main text: Methods (Data, Data availability),<br>Supplementary section 2.0                                |
| <b>4</b>                                                                                              | Specify the inclusion and exclusion criteria. Identify all ad-hoc exclusions.                                                                                                                                                                                                                                                                 | Main text: Methods (Data exclusion criteria),<br>Supplementary Information: 2.0                           |
| <b>5</b>                                                                                              | Provide information on all included data sources and their main characteristics. For each data source used, report reference information or contact name/institution, population represented, data collection method, year(s) of data collection, sex and age range, diagnostic criteria or measurement method, and sample size, as relevant. | Supplementary Information: 2.0                                                                            |
| <b>6</b>                                                                                              | Identify and describe any categories of input data that have potentially important biases (e.g., based on characteristics listed in item 5).                                                                                                                                                                                                  | Main text: Methods (Limitations)                                                                          |
| <i>For data inputs that contribute to the analysis but were not synthesized as part of the study:</i> |                                                                                                                                                                                                                                                                                                                                               |                                                                                                           |
| <b>7</b>                                                                                              | Describe and give sources for any other data inputs.                                                                                                                                                                                                                                                                                          | Main text: Methods (Data: Spatial covariates),<br>Supplementary Information: 2.0 Supplementary covariates |
| <i>For all data inputs:</i>                                                                           |                                                                                                                                                                                                                                                                                                                                               |                                                                                                           |
| <b>8</b>                                                                                              | Provide all data inputs in a file format from which data can be efficiently extracted (e.g., a spreadsheet rather than a PDF), including all relevant meta-data listed in item 5. For any data inputs that cannot be shared because of ethical or legal reasons, such as third-party ownership, provide a contact name or                     | (GHDx link available upon publication)<br>Supplementary Information: 2.0                                  |

|                               |                                                                                                                                                                                                                                                                         |                                                                                                                            |
|-------------------------------|-------------------------------------------------------------------------------------------------------------------------------------------------------------------------------------------------------------------------------------------------------------------------|----------------------------------------------------------------------------------------------------------------------------|
|                               | the name of the institution that retains the right to the data.                                                                                                                                                                                                         |                                                                                                                            |
| <b>Data analysis</b>          |                                                                                                                                                                                                                                                                         |                                                                                                                            |
| <b>9</b>                      | Provide a conceptual overview of the data analysis method. A diagram may be helpful.                                                                                                                                                                                    | Main text: Methods (Data)                                                                                                  |
| <b>10</b>                     | Provide a detailed description of all steps of the analysis, including mathematical formulae. This description should cover, as relevant, data cleaning, data pre-processing, data adjustments and weighting of data sources, and mathematical or statistical model(s). | Main text: Methods (Analysis), Supplementary Information: 4.1 Geostatistical model.                                        |
| <b>11</b>                     | Describe how candidate models were evaluated and how the final model(s) were selected.                                                                                                                                                                                  | Main text: Methods (Analysis: Model validation), Supplementary Information: 5.0 Model Result and 6.0 Model validation.     |
| <b>12</b>                     | Provide the results of an evaluation of model performance, if done, as well as the results of any relevant sensitivity analysis.                                                                                                                                        | Main text: Methods (Analysis), Supplementary Information: 5.0 Model Result and 6.0 Model validation.                       |
| <b>13</b>                     | Describe methods for calculating uncertainty of the estimates. State which sources of uncertainty were, and were not, accounted for in the uncertainty analysis.                                                                                                        | Main text: Methods (Analysis: Geostatistical model), Supplementary Information: 5.0 Model Result and 6.0 Model validation. |
| <b>14</b>                     | State how analytic or statistical source code used to generate estimates can be accessed.                                                                                                                                                                               | (GHDx link available upon publication)                                                                                     |
| <b>Results and Discussion</b> |                                                                                                                                                                                                                                                                         |                                                                                                                            |
| <b>15</b>                     | Provide published estimates in a file format from which data can be efficiently extracted.                                                                                                                                                                              | Raster files for spatial data and CSVs of estimates available at (GHDx link available upon publication)                    |
| <b>16</b>                     | Report a quantitative measure of the uncertainty of the estimates (e.g., uncertainty intervals).                                                                                                                                                                        | Supplementary Information: 5.0 Model Result and 6.0 Model validation.                                                      |
| <b>17</b>                     | Interpret results in light of existing evidence. If updating a previous set of estimates, describe the reasons for changes in estimates.                                                                                                                                | Main text: Results and Discussion sections.                                                                                |
| <b>18</b>                     | Discuss limitations of the estimates. Include a discussion of any modelling assumptions or data limitations that affect interpretation of the estimates.                                                                                                                | Main text: Methods (Limitations)                                                                                           |

96 **2.0 Supplementary data**

97 We modelled the prevalence of anaemia among women of reproductive age (WRA; ages 15–49) in 82 low- and middle-income  
 98 countries (LMICs) from 2000 to 2018, and stratified by anaemia severity. These countries were determined by their Socio-  
 99 demographic Index (SDI), a summary measure of development which combines education, fertility, and poverty, developed and  
 100 computed by the Global Burden of Disease (GBD) study<sup>1</sup>. Malaysia, China, and Iran were included despite high-middle SDI status to  
 101 create better geographic continuity. Albania, Bosnia-Herzegovina, North Korea, and Moldova were excluded despite their middle SDI  
 102 status due to geographic discontinuity with other included countries and lack of available survey data. We did not estimate for the  
 103 island nations of American Samoa, Federated States of Micronesia, Fiji, Kiribati, Marshall Islands, Samoa, Solomon Islands, or Tonga,  
 104 where no available survey data could be sourced.

105  
 106 The list of data sources used to model anaemia can be found in the Global Health Data Exchange by Number Identification (ID):  
 107 [http://ghdx.healthdata.org/lbd-publication-data-input-sources?field\\_rec\\_ihme\\_publication\\_tid=29140](http://ghdx.healthdata.org/lbd-publication-data-input-sources?field_rec_ihme_publication_tid=29140).

108  
 109 **Supplementary Table 2: Summary of data source geographical resolution, and haemoglobin assessment methods**

|                                    | Microdata (Point) Sources |                |         | Administrative (Polygonal) Sources |                |         | Total |
|------------------------------------|---------------------------|----------------|---------|------------------------------------|----------------|---------|-------|
|                                    | Venous Draw               | Capillary Draw | Unknown | Venous Draw                        | Capillary Draw | Unknown |       |
| <b>Hemocue</b>                     | 115                       | 5              | 4       | 11                                 | 20             | 2       | 157   |
| <b>Centrifuge/Hematocrit</b>       | 1                         | 0              | 0       | 2                                  | 1              | 0       | 4     |
| <b>Dried blood spot</b>            | 1                         | 0              | 0       | 0                                  | 1              | 0       | 2     |
| <b>Liquid blood &amp; Spectral</b> | 0                         | 1              | 0       | 2                                  | 0              | 2       | 5     |
| <b>Unknown</b>                     | 2                         | 0              | 5       | 10                                 | 3              | 22      | 42    |
| <b>Total</b>                       | 119                       | 6              | 9       | 25                                 | 25             | 26      | 210   |
| <b>Spatial Resolution Total</b>    | 134                       |                |         | 76                                 |                |         |       |

110  
 111 136 sources gave raw haemoglobin values (135 microdata surveys and 1 administrative data survey) and 74 sources reported  
 112 categorically binned data (74 administrative data surveys). Country-specific surveys made up 12 of the 135 microdata sources used in

113 the models, consisting of National Nutrition surveys and Demographic and Family Health surveys from Latin America and Pakistan,  
114 and the Indonesia Family Life Survey.

115  
116 18 of 75 administrative data reports were sourced from the GHDx, and 57 reports were gathered from a systematic literature review of  
117 31,821 search results on PubMed. Testing increasingly targeted search strings against broader search results' accepted sources allowed  
118 us to hone the number of papers reviewed down. China's 15,675 search results were narrowed to 2982 using our optimised search  
119 string, resulting in more accepted administrative data sources than from any other country.

120  
121 **Supplementary Table 3: The low- and middle-income countries included in model of prevalence of anaemia from 2000 to 2018**

| Country                          | SDI    | SDI Quintile    |
|----------------------------------|--------|-----------------|
| Afghanistan                      | 0.2903 | Low SDI         |
| Angola                           | 0.4605 | Low-middle SDI  |
| Bangladesh                       | 0.4580 | Low SDI         |
| Benin                            | 0.3734 | Low SDI         |
| Bhutan                           | 0.5699 | Low-middle SDI  |
| Bolivia                          | 0.5874 | Low-middle SDI  |
| Brazil                           | 0.6633 | Middle SDI      |
| Burkina Faso                     | 0.2839 | Low SDI         |
| Burundi                          | 0.3097 | Low SDI         |
| Cambodia                         | 0.4816 | Low-middle SDI  |
| Cameroon                         | 0.4820 | Low-middle SDI  |
| Cape Verde                       | 0.5491 | Low-middle SDI  |
| Central African Republic         | 0.3344 | Low SDI         |
| Chad                             | 0.2529 | Low SDI         |
| China                            | 0.7073 | High-middle SDI |
| Colombia                         | 0.6337 | Middle SDI      |
| Côte d'Ivoire                    | 0.4121 | Low SDI         |
| Democratic Republic of the Congo | 0.3645 | Low SDI         |
| Ecuador                          | 0.6356 | Middle SDI      |
| Egypt                            | 0.6043 | Low-middle SDI  |



| <b>Country</b>    | <b>SDI</b> | <b>SDI Quintile</b> |
|-------------------|------------|---------------------|
| El Salvador       | 0.5931     | Low-middle SDI      |
| Equatorial Guinea | 0.6252     | Middle SDI          |
| Ethiopia          | 0.3342     | Low SDI             |
| Gabon             | 0.6506     | Middle SDI          |
| Ghana             | 0.5370     | Low-middle SDI      |
| Guatemala         | 0.5242     | Low-middle SDI      |
| Guinea            | 0.3247     | Low SDI             |
| Guinea-Bissau     | 0.3490     | Low SDI             |
| Guyana            | 0.5837     | Low-middle SDI      |
| Haiti             | 0.4417     | Low SDI             |
| Honduras          | 0.5123     | Low-middle SDI      |
| India             | 0.5502     | Low-middle SDI      |
| Indonesia         | 0.6476     | Middle SDI          |
| Iran              | 0.7001     | High-middle SDI     |
| Jordan            | 0.6968     | Middle SDI          |
| Kenya             | 0.4995     | Low-middle SDI      |
| Kyrgyzstan        | 0.6066     | Low-middle SDI      |
| Laos              | 0.5188     | Low-middle SDI      |
| Lesotho           | 0.4934     | Low-middle SDI      |
| Liberia           | 0.3284     | Low SDI             |
| Madagascar        | 0.3308     | Low SDI             |
| Malawi            | 0.3493     | Low SDI             |
| Malaysia          | 0.7592     | High-middle SDI     |
| Mali              | 0.2669     | Low SDI             |
| Mexico            | 0.6284     | Middle SDI          |
| Mongolia          | 0.6619     | Middle SDI          |
| Morocco           | 0.5792     | Low-middle SDI      |
| Mozambique        | 0.3405     | Low SDI             |
| Myanmar           | 0.5558     | Low-middle SDI      |

| <b>Country</b>        | <b>SDI</b> | <b>SDI Quintile</b> |
|-----------------------|------------|---------------------|
| Namibia               | 0.6158     | Middle SDI          |
| Nepal                 | 0.4285     | Low SDI             |
| Niger                 | 0.1906     | Low SDI             |
| Nigeria               | 0.4934     | Low-middle SDI      |
| Pakistan              | 0.4922     | Low-middle SDI      |
| Palestine             | 0.5414     | Low-middle SDI      |
| Papua New Guinea      | 0.4190     | Low SDI             |
| Peru                  | 0.6358     | Middle SDI          |
| Republic of the Congo | 0.5741     | Low-middle SDI      |
| Rwanda                | 0.4074     | Low SDI             |
| Sao Tome and Principe | 0.4883     | Low-middle SDI      |
| Senegal               | 0.3730     | Low SDI             |
| Sierra Leone          | 0.3572     | Low SDI             |
| Somalia               | 0.2348     | Low SDI             |
| South Africa          | 0.6765     | Middle SDI          |
| Sri Lanka             | 0.6797     | Middle SDI          |
| Sudan                 | 0.4779     | Low-middle SDI      |
| Swaziland             | 0.5777     | Low-middle SDI      |
| Tajikistan            | 0.5226     | Low-middle SDI      |
| Tanzania              | 0.4122     | Low SDI             |
| Thailand              | 0.6843     | Middle SDI          |
| The Gambia            | 0.4048     | Low SDI             |
| Timor-Leste           | 0.5048     | Low-middle SDI      |
| Togo                  | 0.4133     | Low SDI             |
| Tunisia               | 0.6754     | Middle SDI          |
| Turkmenistan          | 0.6964     | Middle SDI          |
| Uganda                | 0.3877     | Low SDI             |
| Uzbekistan            | 0.6295     | Middle SDI          |
| Venezuela             | 0.6554     | Middle SDI          |

122

| Country  | SDI    | SDI Quintile   |
|----------|--------|----------------|
| Vietnam  | 0.6068 | Middle SDI     |
| Yemen    | 0.4295 | Low SDI        |
| Zambia   | 0.4722 | Low-middle SDI |
| Zimbabwe | 0.4632 | Low-middle SDI |

123

**Supplementary Table 4: The low- and middle-income countries excluded in model of prevalence of anaemia from 2000 to 2018**

| Country             | SDI    | SDI Quintile   |
|---------------------|--------|----------------|
| Algeria             | 0.6958 | Middle SDI     |
| Belize              | 0.6022 | Low-middle SDI |
| Botswana            | 0.6632 | Middle SDI     |
| Comoros             | 0.4343 | Low SDI        |
| Costa Rica          | 0.6621 | Middle SDI     |
| Cuba                | 0.6877 | Middle SDI     |
| Djibouti            | 0.4848 | Low-middle SDI |
| Dominican Republic  | 0.5926 | Low-middle SDI |
| Eritrea             | 0.4088 | Low SDI        |
| French Guiana       | NA     | NA             |
| Iraq                | 0.5848 | Low-middle SDI |
| Jamaica             | 0.6785 | Middle SDI     |
| Mauritania          | 0.4706 | Low-middle SDI |
| Nicaragua           | 0.5296 | Low-middle SDI |
| Panama              | 0.6770 | Middle SDI     |
| Paraguay            | 0.6188 | Middle SDI     |
| Philippines         | 0.6172 | Middle SDI     |
| South Sudan         | 0.2747 | Low SDI        |
| Suriname            | 0.6410 | Middle SDI     |
| Syria               | 0.6111 | Middle SDI     |
| Trinidad and Tobago | 0.6984 | Middle SDI     |
| Western Sahara      | NA     | NA             |

| Country            | SDI | SDI Quintile |
|--------------------|-----|--------------|
| Albania            | NA  | NA           |
| Bosnia-Herzegovina | NA  | NA           |
| North Korea        | NA  | NA           |
| Moldova            | NA  | NA           |

124

125

126 Supplementary Table 5: Altitude adjustment to measured haemoglobin concentrations<sup>37</sup>

| Altitude (metres above sea level) | Measured haemoglobin adjustments (g/L) |
|-----------------------------------|----------------------------------------|
| < 1000                            | 0                                      |
| 1000                              | -2                                     |
| 1500                              | -5                                     |
| 2000                              | -8                                     |
| 2500                              | -13                                    |
| 3000                              | -19                                    |
| 3500                              | -27                                    |
| 4000                              | -35                                    |
| 4500                              | -45                                    |

127

128 Supplementary Table 6<sup>24</sup>: Smoking status adjustments to measured haemoglobin concentrations<sup>37</sup>.

| Smoking status | Measured haemoglobin adjustments (g/L) |
|----------------|----------------------------------------|
| Non-smoker     | 0                                      |
| Smoker (all)   | -0.3                                   |
| ½–1 Packet/day | -0.3                                   |

|                |      |
|----------------|------|
| 1–2 Packet/day | -0.5 |
| ≥2 Packet/day  | -0.7 |

129

130 Supplementary Table 7: Smoking and elevation adjusted haemoglobin level definitions to diagnose anaemia (g/L)<sup>37</sup>

| Population         | Non-anaemic | Mild anaemia | Moderate anaemia | Severe anaemia |
|--------------------|-------------|--------------|------------------|----------------|
| Non-pregnant women | ≥120        | 110–119      | 80–109           | <80            |
| Pregnant women     | ≥110        | 100–109      | 70–99            | <70            |

131

132

133 Supplementary Figures 1–5 show the data availability for anaemia in the 82 countries in our analysis. We incorporated data from  
 134 several survey series, including the Demographic and Health Survey by Macro International (Macro DHS), the Malaria Indicator  
 135 Survey (MACRO-MIS), United Nations International Children’s Emergency Fund (UNICEF MICS), the Pan Arab Programme on Family  
 136 Health survey by League of Arab States (PAPFAM), the Living Standards Measurement Study by World Bank (LSMS), the Family Life  
 137 Survey by RAND Corporation (RAND FLS), the Reproductive Health Survey by Center for Disease Control (CDC RHS), the Demographic  
 138 and Health Survey for Pacific countries funded by the Asian Development Bank (ADB DHS), and country-specific surveys that were  
 139 not clearly associated with an international survey series. We regularly monitored larger survey series such as Macro DHS and  
 140 UNICEF MICS for new data. We also included data from scientific literature by conducting a systematic literature review. We  
 141 searched PubMed for articles published after January 1, 1998 with the following key terms: “haemoglobin”, “anaemia”, and  
 142 “haematocrit”. First, we did a title/abstract screen of the PubMed search results to remove publications that did not report anaemia  
 143 prevalence in women of reproductive age. We then did a full text review of the remaining articles to ensure the data met the  
 144 inclusion criteria. We manually extracted data from the accepted publications into Excel spreadsheets. The database for anaemia  
 145 consists of 218 geo-referenced household surveys representing over 3 million WRA in LMICs.

146

147

148

149

150  
151  
152  
153  
154  
155  
156

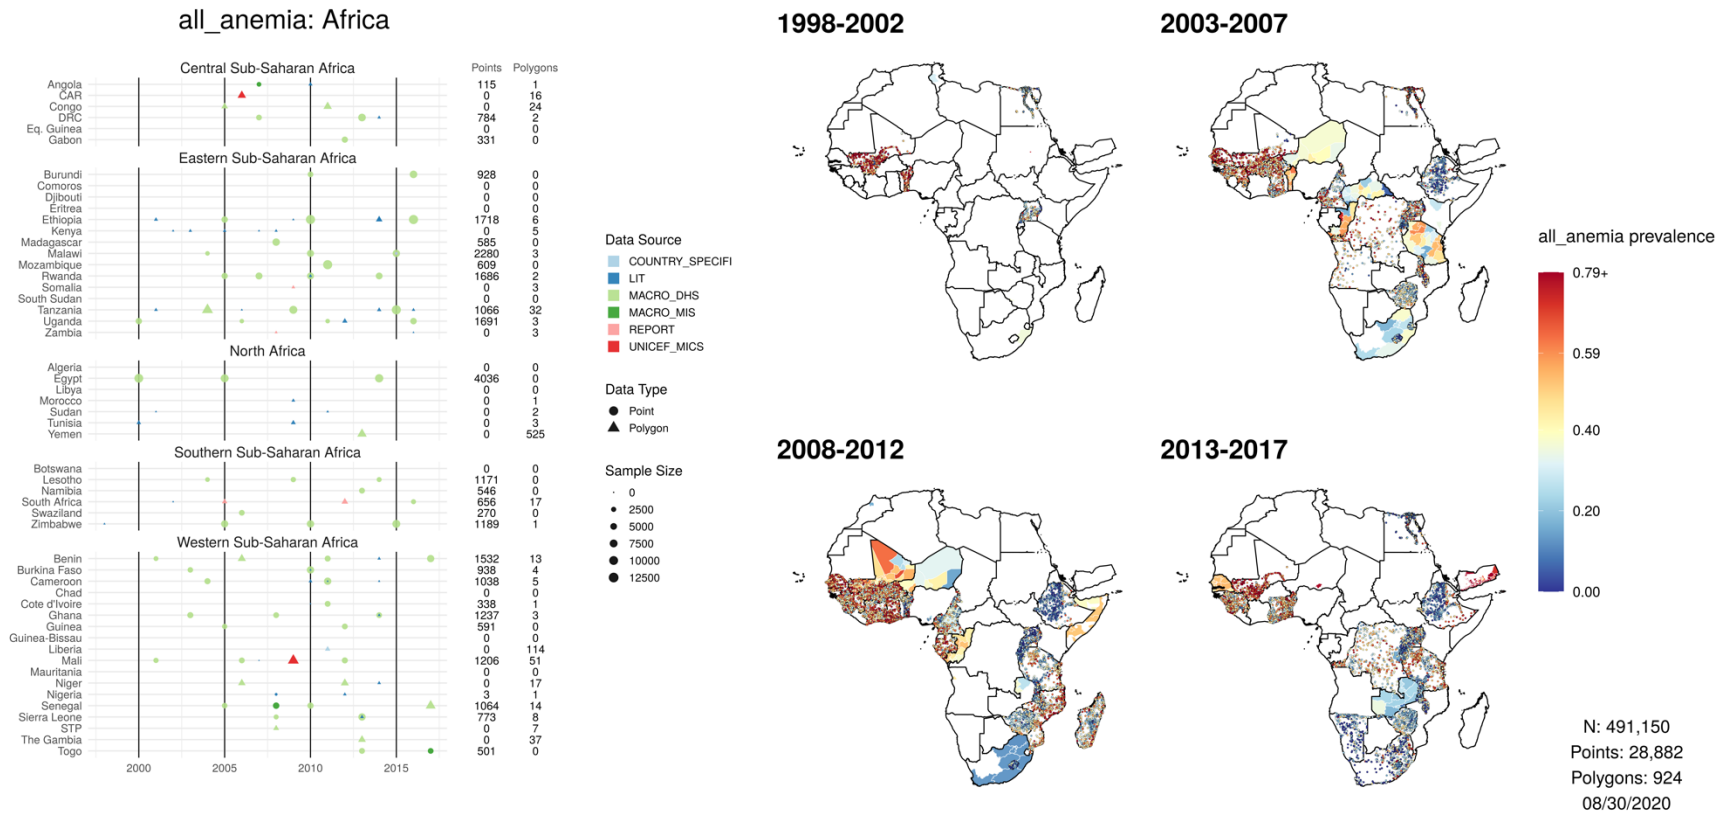

157  
158  
159

**Supplementary Figure 1: Anaemia data availability by type and country, 1998–2018, in Africa**

160 All data are shown by country and year of survey and mapped at their corresponding geo-positioned coordinate or area. The total  
 161 number of points and polygons (areal) for each country are plotted by data source, type, and sample size. Sample size represents the  
 162 number of individual microdata records for each survey. Mean anaemia prevalence of the input coordinate or area is mapped.

all\_anemia: Latin America and Caribbean

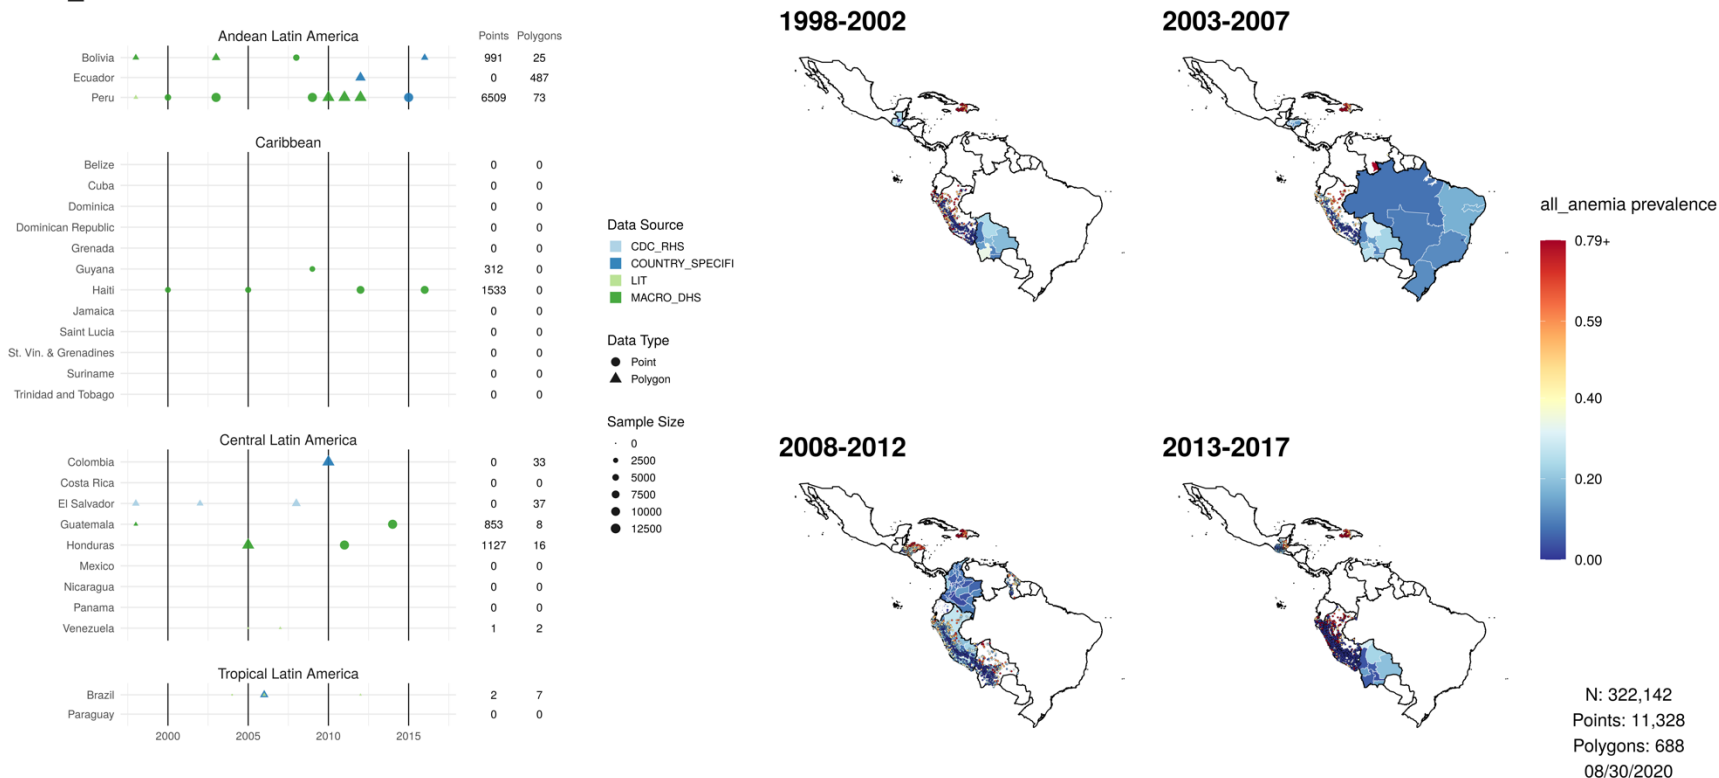

163  
 164  
 165 **Supplementary Figure 2: Anaemia data availability by type and country, 1998–2018, in Central America and the Caribbean and**  
 166 **South America**

167 All data are shown by country and year of survey and mapped at their corresponding geo-positioned coordinate or area. The total  
 168 number of points and polygons (areal) for each country are plotted by data source, type, and sample size. Sample size represents the  
 169 number of individual microdata records for each survey. Mean anaemia prevalence of the input coordinate or area is mapped.

170

all\_anemia: East and Southeast Asia

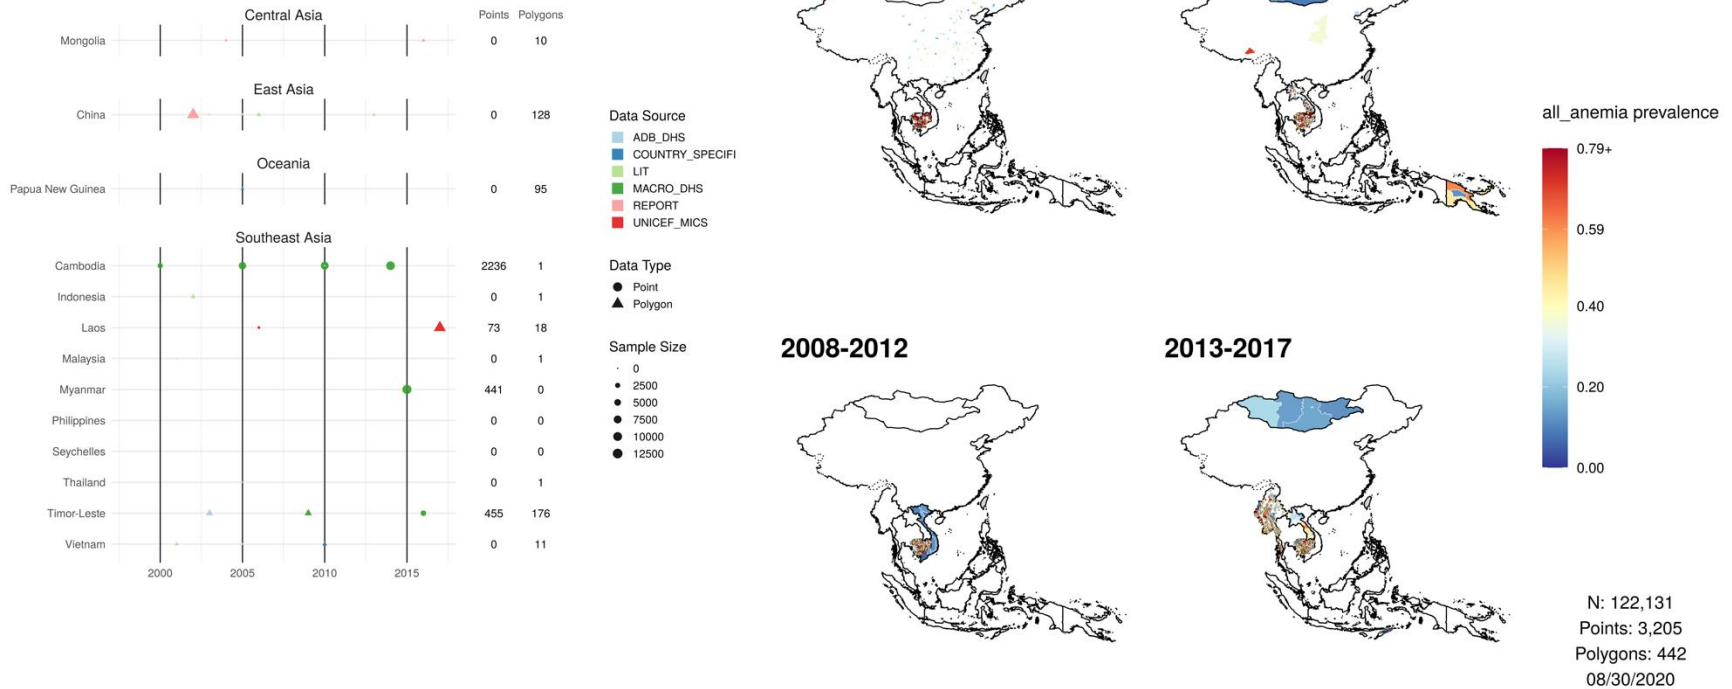

172

173

**Supplementary Figure 3: Anaemia data availability by type and country, 1998–2018, in Southeast Asia.**

174

All data are shown by country and year of survey and mapped at their corresponding geo-positioned coordinate or area. The total number of points and polygons (areal) for each country are plotted by data source, type, and sample size. Sample size represents the number of individual microdata records for each survey. Mean anaemia prevalence of the input coordinate or area is mapped.

176



all\_anemia: South Asia

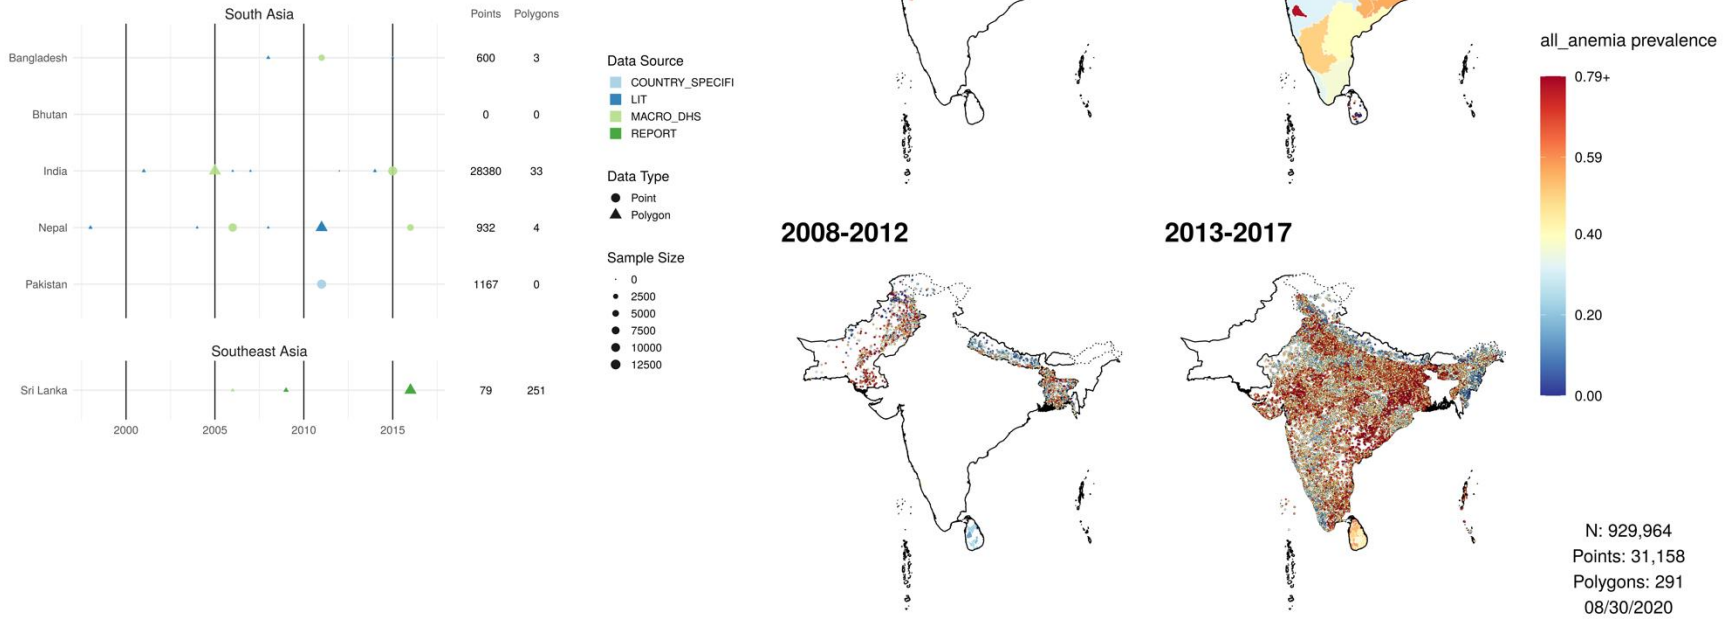

177  
178  
179  
180  
181

**Supplementary Figure 4: Anaemia data availability by type and country, 1998–2018, in South Asia**

All data are shown by country and year of survey and mapped at their corresponding geo-positioned coordinate or area. The total number of points and polygons (areal) for each country are plotted by data source, type, and sample size. Sample size represents the number of individual microdata records for each survey. Mean anaemia prevalence of the input coordinate or area is mapped.

all\_anemia: MIDDLE\_EAST-TUR

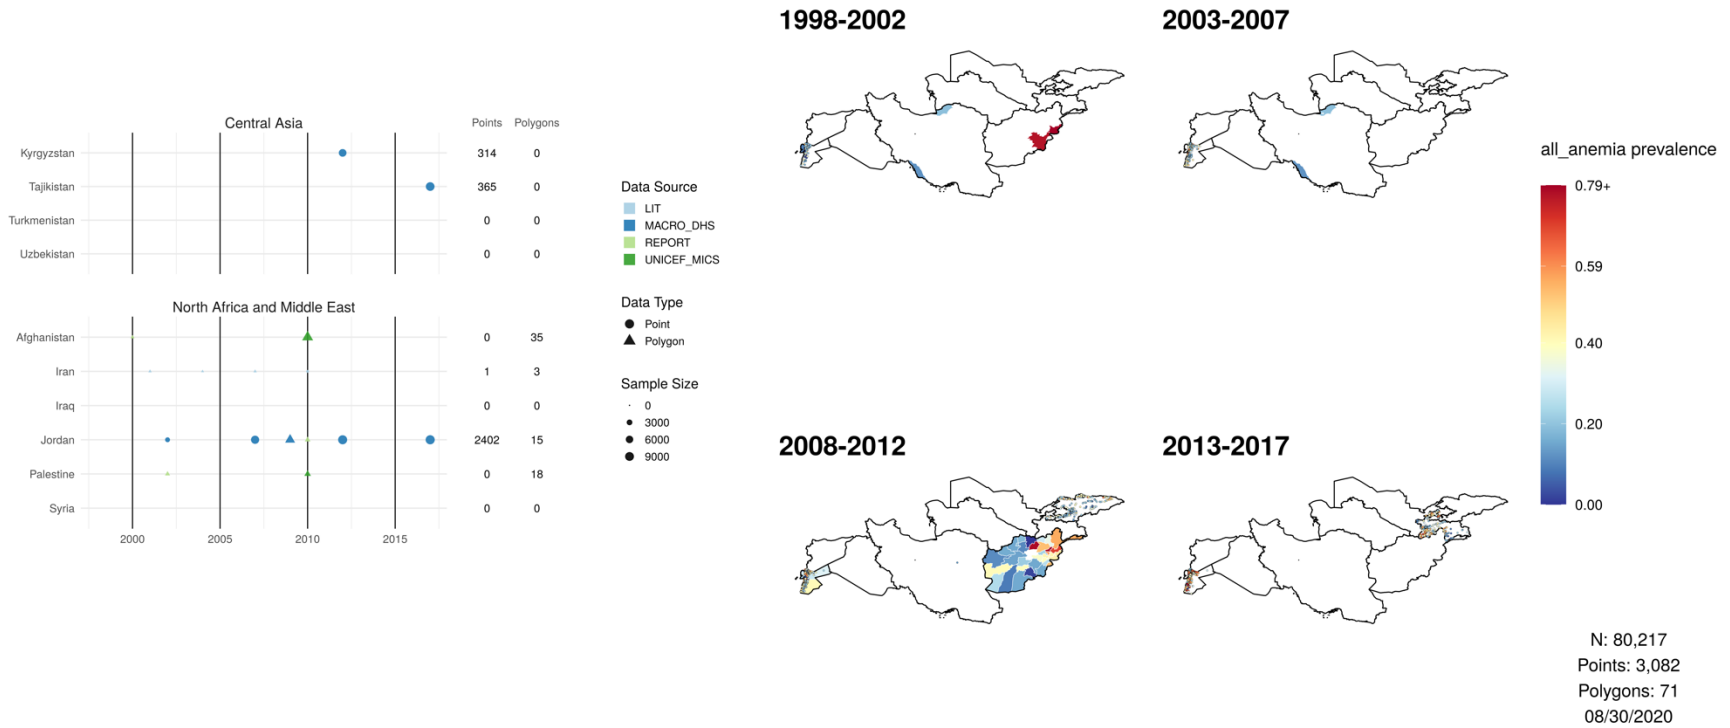

182  
183  
184  
185  
186  
187  
188  
189  
190  
191

**Supplementary Figure 5: Anaemia data availability by type and country, 1998–2018, in Middle East and Central Asia**

All data are shown by country and year of survey and mapped at their corresponding geo-positioned coordinate or area. The total number of points and polygons (areal) for each country are plotted by data source, type, and sample size. Sample size represents the number of individual microdata records for each survey. Mean anaemia prevalence of the input coordinate or area is mapped.

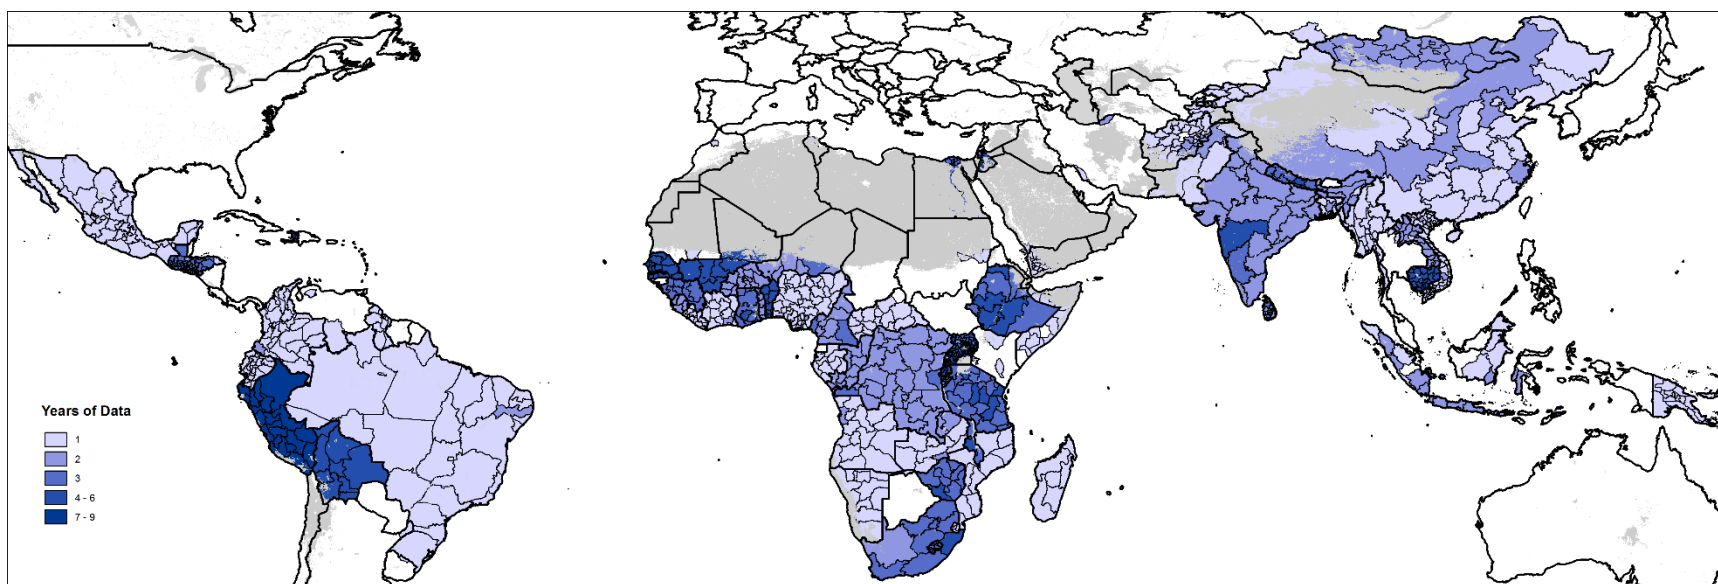

192  
193  
194  
195  
196  
197  
198

**Supplementary Figure 6: Years of data informing administrative level one units**

The number of years of extracted data (during 2000–2018) within each administrative level one unit. This figure only illustrates the number of years of observed data and not the sample size or volume of the data. The majority of the data sources contained point-referenced data, and those that did not primarily contained data that was representative for administrative level one polygons.

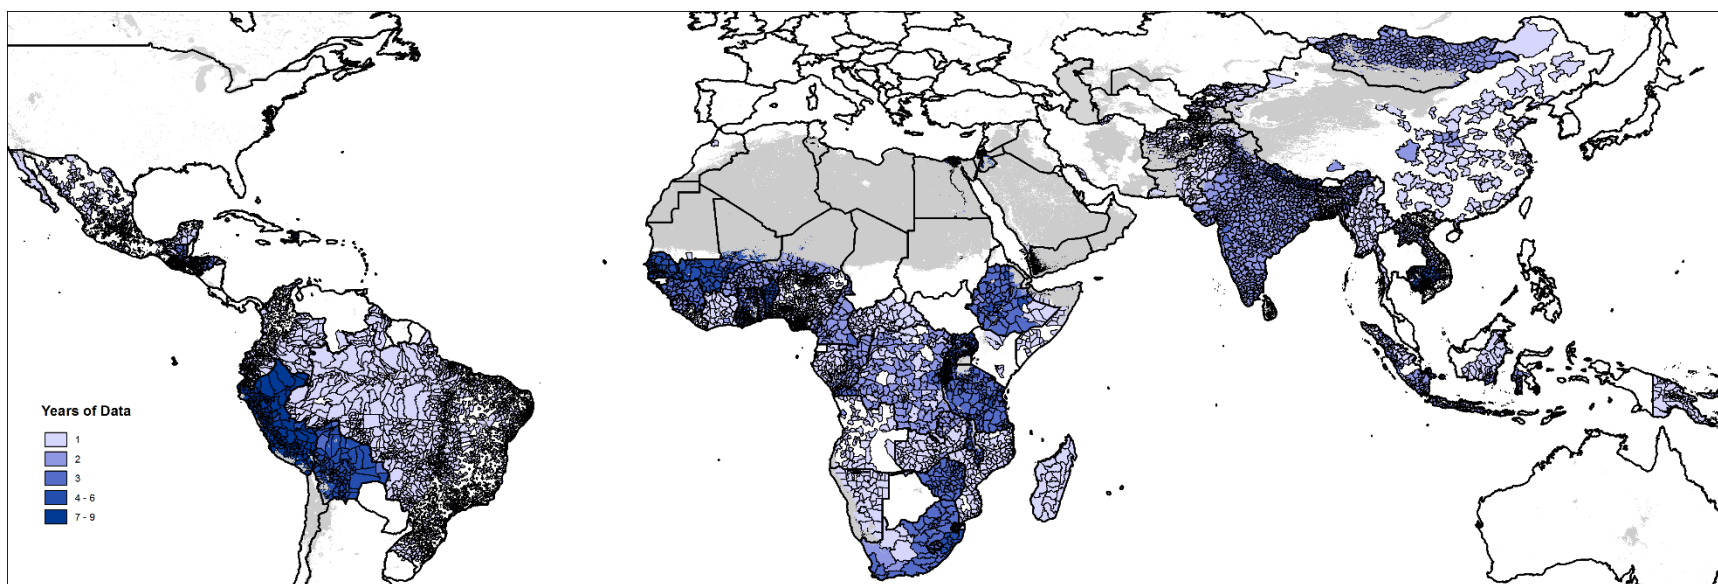

199  
200  
201  
202  
203  
204  
205  
206  
207

**Supplementary Figure 7: Years of data informing administrative level two units**

The number of years of extracted data (during 2000–2018) within each administrative level one unit. This figure only illustrates the number of years of observed data and not the sample size or volume of the data. The majority of the data sources contained point-referenced data and those that did not primarily contained data that was representative for administrative level one polygons. Polygonal data was resampled to points, and, as such, this second-level data volume map may suggest more data than was available at each of these administrative units. For a more representative illustration of the data volume used in this study, please see Supplementary Figure 6.

208 **3.0 Supplementary covariates**

209

210 **Supplementary Table 8: Covariates used in mapping**

| No. | Covariate                                             | Temporal resolution | Source                                                                    | Reference                                                                                                                                                                                                                                                                                                                                                                                                                                             |
|-----|-------------------------------------------------------|---------------------|---------------------------------------------------------------------------|-------------------------------------------------------------------------------------------------------------------------------------------------------------------------------------------------------------------------------------------------------------------------------------------------------------------------------------------------------------------------------------------------------------------------------------------------------|
| 1   | Travel time to nearest settlement >50,000 inhabitants | Static              | Big Data Institute, Nuffield Department of Medicine, University of Oxford | Weiss, D. J. et al. A global map of travel time to cities to assess inequalities in accessibility in 2015. <i>Nature</i> 533, 333-336 (2018).<br>Available at: <a href="https://forobs.irc.ec.europa.eu/products/gam/download.php">https://forobs.irc.ec.europa.eu/products/gam/download.php</a>                                                                                                                                                      |
| 2   | Average daily mean temperature                        | Annual              | CRUTS                                                                     | Harris, I., Jones, P. d., Osborn, T. j. & Lister, D. h. Updated high-resolution grids of monthly climatic observations – the CRU TS3.10 dataset. <i>Int. J. Climatol.</i> 34, 623–642 (2014).<br><br>University of East Anglia. Climatic Research Unit TS v. 3.24 dataset.<br>Available at: <a href="https://crudata.uea.ac.uk/cru/data/hrg/cru_ts_3.24.01/">https://crudata.uea.ac.uk/cru/data/hrg/cru_ts_3.24.01/</a> . (Accessed: 24th July 2017). |
| 3   | Average daily mean rainfall (Precipitation)           | Annual              | CRUTS                                                                     | Harris, I., Jones, P. d., Osborn, T. j. & Lister, D. h. Updated high-resolution grids of monthly climatic observations – the CRU TS3.10 dataset. <i>Int. J. Climatol.</i> 34, 623–642 (2014).<br><br>University of East Anglia. Climatic Research Unit TS v. 3.24 dataset.<br>Available at: <a href="https://crudata.uea.ac.uk/cru/data/hrg/cru_ts_3.24.01/">https://crudata.uea.ac.uk/cru/data/hrg/cru_ts_3.24.01/</a> . (Accessed: 24th July 2017). |
| 4   | Fertility                                             | Annual              | WorldPop (derived)                                                        | Lloyd, C. T., Sorichetta, A. & Tatem, A. J. High resolution global gridded data for use in population studies. <i>Sci. Data</i> 4, sdata20171 (2017).<br><br>World Pop. Get data. Available at: <a href="http://www.worldpop.org.uk/data/get_data/">http://www.worldpop.org.uk/data/get_data/</a> . (Accessed: 25th July 2017)                                                                                                                        |

| No. | Covariate                       | Temporal resolution | Source                   | Reference                                                                                                                                                                                                                                                                                                               |
|-----|---------------------------------|---------------------|--------------------------|-------------------------------------------------------------------------------------------------------------------------------------------------------------------------------------------------------------------------------------------------------------------------------------------------------------------------|
| 5   | Nutritional yield for vitamin A | Static              | Herrero et al (modelled) | Herrero, M. et al. Farming and the geography of nutrient production for human use: a transdisciplinary analysis. Lancet Planet. Health 1, e33–e42 (2017). Contact <a href="#">M. Herrero</a> for availability.                                                                                                          |
| 6   | Irrigation                      | Static              | University of Frankfurt  | Goethe-Universität. Generation of a digital global map of irrigation areas. Available at: <a href="https://www.uni-frankfurt.de/45218039/Global_Irrigation_Map">https://www.uni-frankfurt.de/45218039/Global Irrigation Map</a> . (Accessed: 25th July 2017)                                                            |
| 7   | Malaria incidence               | Annual              | Malaria Atlas Project    | Bhatt, S. et al. The effect of malaria control on Plasmodium falciparum in Africa between 2000 and 2015. Nature 526, 207–211 (2015). Available at: <a href="https://malariaatlas.org/malaria-burden-data-download/">https://malariaatlas.org/malaria-burden-data-download/</a>                                          |
| 8   | Population                      | Annual              | WorldPop                 | Lloyd, C. T., Sorichetta, A. & Tatem, A. J. High resolution global gridded data for use in population studies. Sci. Data 4, sdata20171 (2017).<br><br>World Pop. Get data. Available at: <a href="http://www.worldpop.org.uk/data/get-data/">http://www.worldpop.org.uk/data/get-data/</a> . (Accessed: 25th July 2017) |
| 9   | Nutritional yield for iron      | Static              | Herrero et al 2017       | Herrero, M. et al. Farming and the geography of nutrient production for human use: a transdisciplinary analysis. Lancet Planet. Health 1, e33–e42 (2017). Contact <a href="#">M. Herrero</a> for availability.                                                                                                          |
| 10  | Nutritional yield for zinc      | Static              | Herrero et al 2017       | Herrero, M. et al. Farming and the geography of nutrient production for human use: a transdisciplinary analysis. Lancet Planet. Health 1, e33–e42 (2017). Contact <a href="#">M. Herrero</a> for availability.                                                                                                          |
| 11  | Land cover                      | Annual              | MODIS                    | <a href="https://lpdaac.usgs.gov/products/mcd12q1v006/">https://lpdaac.usgs.gov/products/mcd12q1v006/</a>                                                                                                                                                                                                               |

| No. | Covariate                                                      | Temporal resolution | Source                                                                                            | Reference                                                                                                                                                                                                                                                                                                                                                                                                    |
|-----|----------------------------------------------------------------|---------------------|---------------------------------------------------------------------------------------------------|--------------------------------------------------------------------------------------------------------------------------------------------------------------------------------------------------------------------------------------------------------------------------------------------------------------------------------------------------------------------------------------------------------------|
| 12  | Particulate matter in cubic micrograms (outdoor air pollution) | Annual              | Ambient air pollution data (pm 2.5) as modelled for GBD                                           | Shaddick, Gavin, et al. "Data integration model for air quality: a hierarchical approach to the global estimation of exposures to ambient air pollution." <i>Journal of the Royal Statistical Society: Series C (Applied Statistics)</i> 67.1 (2018): 231-253.<br>Please contact the corresponding author for availability.                                                                                  |
| 13  | Multi-source Weighted-Ensemble Precipitation                   | Annual              | <a href="https://data.princetonclimate.com/opendap">https://data.princetonclimate.com/opendap</a> | Beck, H.E., A.I.J.M. van Dijk, V. Levizzani, J. Schellekens, D.G. Miralles, B. Martens, A. de Roo: MSWEP: 3-hourly 0.25 global gridded precipitation (1979-2015) by merging gauge, satellite, and reanalysis data, <i>Hydrology and Earth System Sciences</i> , 21(1), 589-615, 2017. Available at: <a href="http://www.gloh2o.org/">http://www.gloh2o.org/</a>                                              |
| 14  | Tassled Cap Brightness                                         | Annual              | MODIS                                                                                             | <a href="https://modis.gsfc.nasa.gov/data/dataproduct/mod43.php">https://modis.gsfc.nasa.gov/data/dataproduct/mod43.php</a>                                                                                                                                                                                                                                                                                  |
| 15  | Prevalence of underweight                                      | Annual              | Kinyoki et al 2020                                                                                | Kinyoki, D.K., Osgood-Zimmerman, A.E., Pickering, B.V. et al. Mapping child growth failure across low- and middle-income countries. <i>Nature</i> 577, 231–234 (2020). Available at: <a href="http://ghdx.healthdata.org/record/ihme-data/lmic-child-growth-failure-geospatial-estimates-2000-2017">http://ghdx.healthdata.org/record/ihme-data/lmic-child-growth-failure-geospatial-estimates-2000-2017</a> |

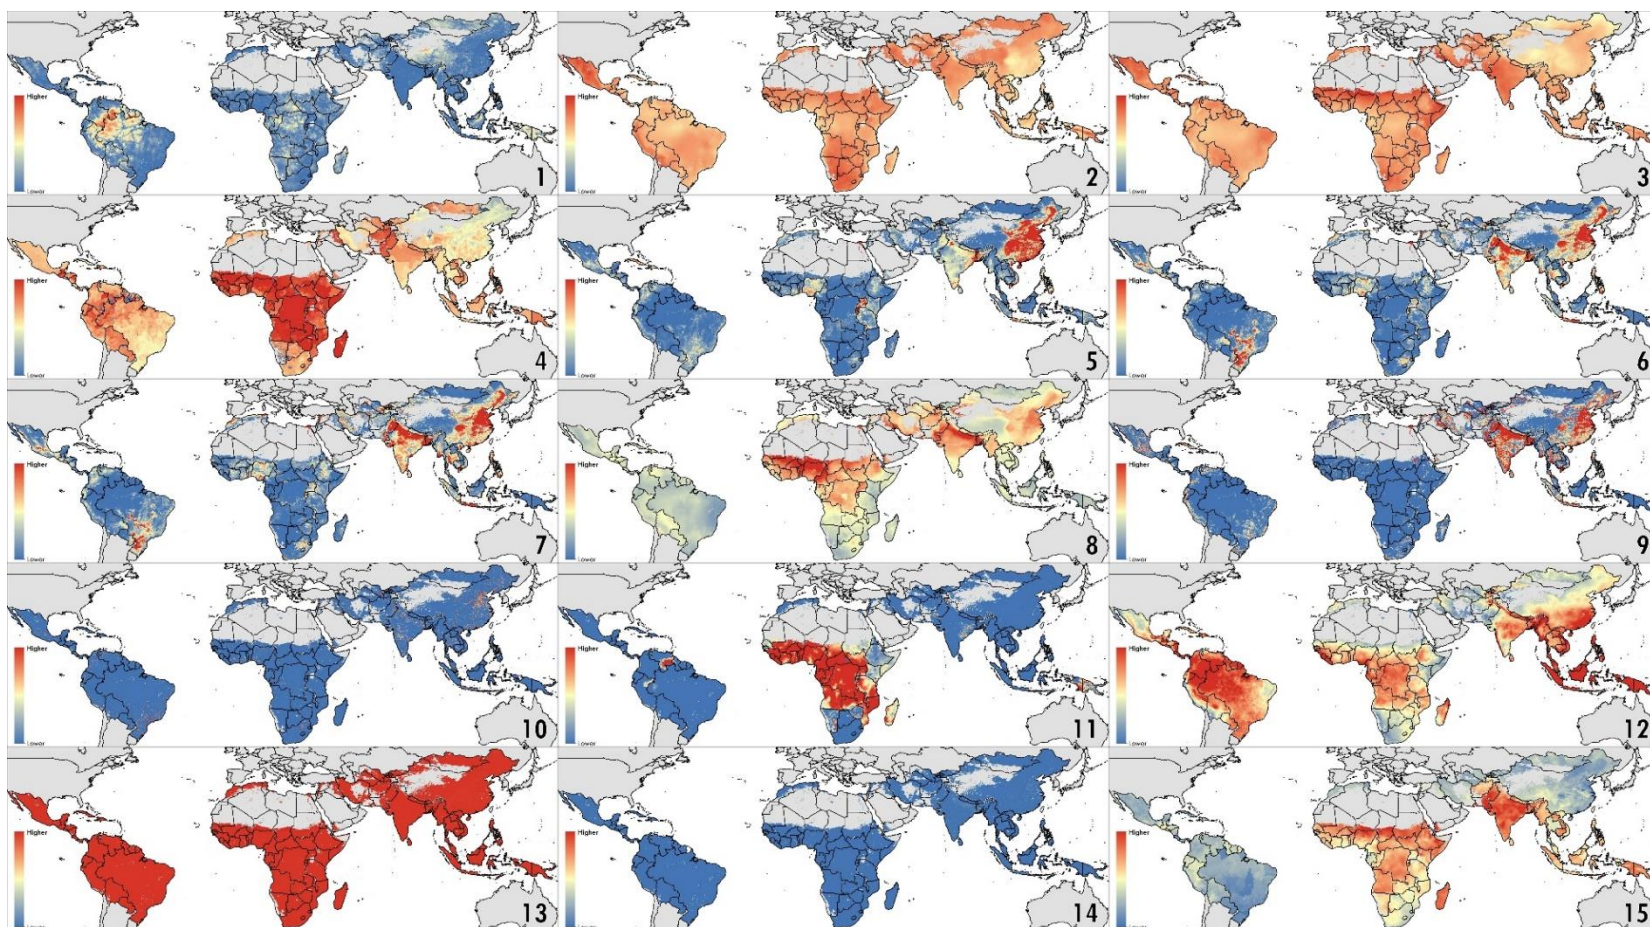

212  
213  
214  
215  
216  
217  
218  
219  
220

**Supplementary Figure 8: Covariates.**

Fifteen covariate raster layers of possible socioeconomic and environmental correlates of anaemia in LMICs were used as inputs for the stacking modelling process. Time-varying covariates are presented for the year 2018. For the year of production of non-time-varying covariates and additional details, please refer to the individual covariate citation in Supplementary Table 4: **1.** Travel time to nearest settlement >50,000 inhabitants, **2.** Average daily mean temperature, **3.** Average daily mean rainfall (Precipitation), **4.** Fertility, **5.** Nutritional yield for vitamin A, **6.** Irrigation, **7.** Malaria incidence, **8.** Population, **9.** Nutritional yield for iron, **10.** Nutritional yield for zinc, **11.** Land cover, **12.** Particulate matter in cubic micrograms (outdoor air pollution), **13.** Multi-source Weighted-Ensemble Precipitation, **14.** Tassled Cap Brightness, **15.** Prevalence of underweight.



221 **4.0 Supplementary methods**

222 4.1 Geostatistical model

223 **Supplementary Table 9: Spatial hyperparameter priors by region**

| <b>Region</b>                     | $\mu_{\theta_1}$ | $\sigma_{\theta_1}^2$ | $\mu_2$  | $\sigma_{\theta_2}^2$ |
|-----------------------------------|------------------|-----------------------|----------|-----------------------|
| Andean South America              | -4.08543         | 10                    | 2.819916 | 10                    |
| Central America and the Caribbean | -4.02711         | 10                    | 2.761601 | 10                    |
| Central sub-Saharan Africa        | -4.29914         | 10                    | 3.033632 | 10                    |
| East Asia                         | -4.02392         | 10                    | 2.758405 | 10                    |
| Eastern sub-Saharan Africa        | -3.96253         | 10                    | 2.697021 | 10                    |
| Middle East                       | -4.65437         | 10                    | 3.388858 | 10                    |
| North Africa                      | -3.9573          | 10                    | 2.691784 | 10                    |
| Southeast Asia and Oceania        | -3.9555          | 10                    | 2.689985 | 10                    |
| South and Central Asia            | -4.50051         | 10                    | 3.234994 | 10                    |
| Southern sub-Saharan Africa       | -4.34465         | 10                    | 3.079134 | 10                    |
| Tropical South America            | -4.61222         | 10                    | 3.34671  | 10                    |
| Western sub-Saharan Africa        | -4.57494         | 10                    | 3.309432 | 10                    |

224

225

226

## Finite elements mesh over Eastern Sub-Saharan Africa

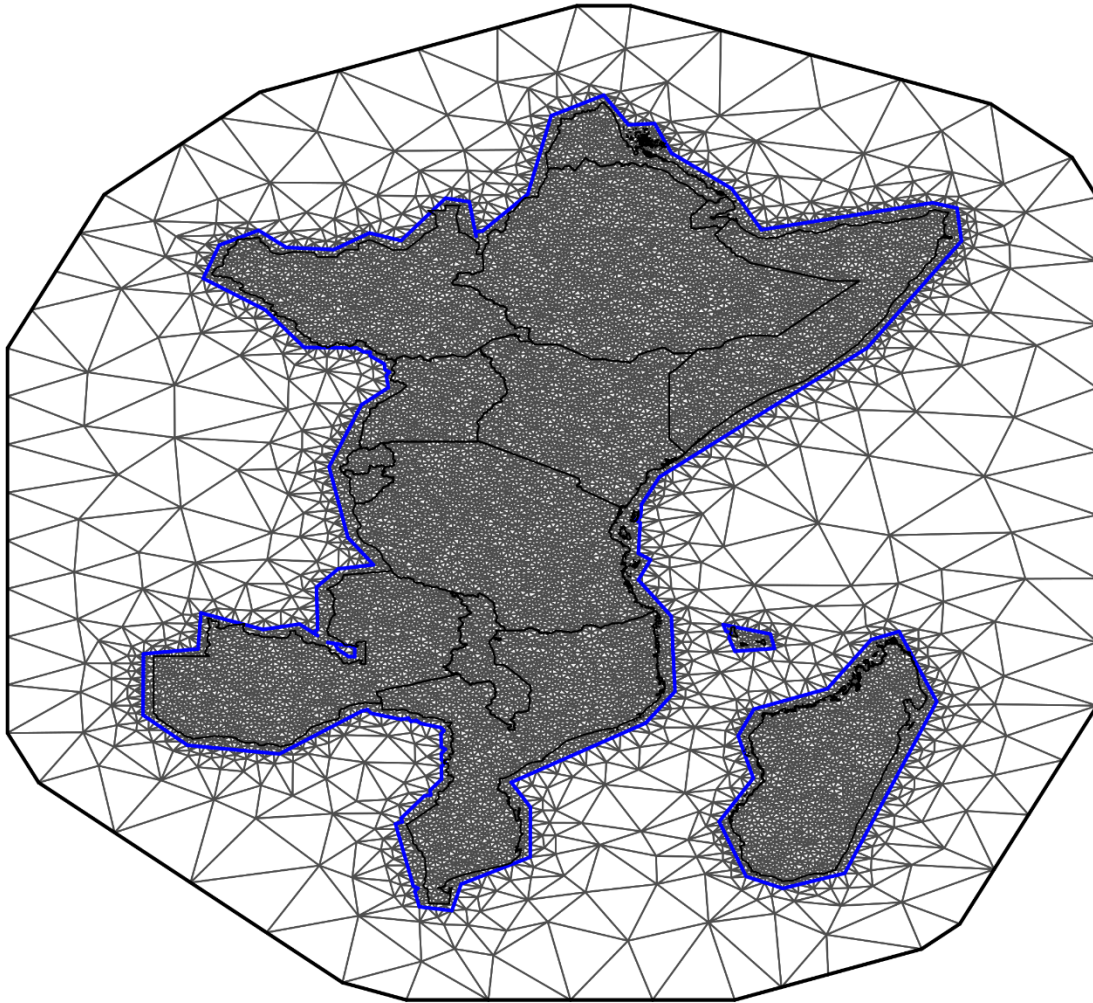

227  
228  
229

### **Supplementary Figure 9: Finite elements mesh**

230 The finite elements mesh used to fit the space-time correlated error for the Eastern sub-  
231 Saharan Africa (ESSA) region overlaid on the countries in ESSA. Both the fine-scale mesh over  
232 land in the modelling region and the coarser buffer region mesh are shown. The simplified  
233 region polygon used to determine the boundary for the modelling region is shown in blue.

234 **5.0 Model result**

235 **Supplementary Table 10: Widest absolute inequalities between subnational districts in 2000 and 2018**

| 2000                       |                        | 2018                                |                        |
|----------------------------|------------------------|-------------------------------------|------------------------|
| ≥3-fold difference<br>(17) | ≥6-fold difference (4) | ≥3-fold difference<br>(26)          | ≥6-fold difference (7) |
| Afghanistan                | Afghanistan            | Afghanistan                         | Bolivia                |
| Bolivia                    | Iran                   | Bolivia                             | Colombia               |
| Brazil                     | Mexico                 | Brazil                              | Ethiopia               |
| Burundi                    | Vietnam                | Burundi                             | Honduras               |
| China                      |                        | China                               | Kenya                  |
| Colombia                   |                        | Colombia                            | Mexico                 |
| Egypt                      |                        | Democratic Republic of<br>the Congo | Venezuela              |
| El Salvador                |                        | Egypt                               |                        |
| Ethiopia                   |                        | El Salvador                         |                        |
| Honduras                   |                        | Ethiopia                            |                        |
| India                      |                        | Haiti                               |                        |
| Iran                       |                        | Honduras                            |                        |
| Kenya                      |                        | India                               |                        |
| Mexico                     |                        | Indonesia                           |                        |
| Uganda                     |                        | Kenya                               |                        |
| Venezuela                  |                        | Mexico                              |                        |
| Vietnam                    |                        | Niger                               |                        |
|                            |                        | Nigeria                             |                        |
|                            |                        | Papua New Guinea                    |                        |
|                            |                        | Rwanda                              |                        |
|                            |                        | South Africa                        |                        |
|                            |                        | Tajikistan                          |                        |
|                            |                        | Tanzania                            |                        |
|                            |                        | Thailand                            |                        |
|                            |                        | Venezuela                           |                        |
|                            |                        | Vietnam                             |                        |

236 **Supplementary Table 11: Widest relative inequalities: LMICs with districts deviating  $\geq 50\%$  from the national mean in 2000 and 2018**

| 2000 (27 LMICs)                  | 2018 (36 LMICs)                  |
|----------------------------------|----------------------------------|
| Afghanistan                      | Afghanistan                      |
| Burundi                          | Burundi                          |
| Bolivia                          | Bolivia                          |
| Brazil                           | Brazil                           |
| China                            | China                            |
| Colombia                         | Colombia                         |
| Democratic Republic of the Congo | Democratic Republic of the Congo |
| Ecuador                          | Ecuador                          |
| Egypt                            | Egypt                            |
| El Salvador                      | El Salvador                      |
| Ethiopia                         | Ethiopia                         |
| Guyana                           | Guatemala                        |
| Honduras                         | Haiti                            |
| Haiti                            | Honduras                         |
| Indonesia                        | Indonesia                        |
| India                            | India                            |
| Iran                             | Iran                             |
| Kenya                            | Kenya                            |
| Mexico                           | Laos                             |
| Peru                             | Mexico                           |
| Rwanda                           | Mongolia                         |
| Sudan                            | Nepal                            |
| Thailand                         | Niger                            |
| Tanzania                         | Nigeria                          |
| Uganda                           | Papua New Guinea                 |
| Venezuela                        | Peru                             |
| Vietnam                          | Rwanda                           |
|                                  | South Africa                     |
|                                  | Tajikistan                       |

|  |                                                                                   |
|--|-----------------------------------------------------------------------------------|
|  | Tanzania<br>Thailand<br>Timor-Leste<br>Uganda<br>Venezuela<br>Vietnam<br>Zimbabwe |
|--|-----------------------------------------------------------------------------------|

237

238

239 **Supplementary Table 12: Shifts in the number of WRA with anaemia by districts in 2000 and 2018**

| WRA with anaemia | Number of districts in 2000 | Number of districts in 2018 |
|------------------|-----------------------------|-----------------------------|
| <5,000           | 66.8% (14643 of 21917)      | 65.2% (14292 of 21917)      |
| 5,000–14,999     | 17.7% (3879 of 21917)       | 14.6% (3199 of 21917)       |
| 15,000–49,999    | 8.8% (1926 of 21917)        | 12.4% (2716 of 21917)       |
| 50,000–150,000   | 3.8% (823 of 21917)         | 4.5% (991 of 21917)         |
| >150,000         | 3.1% (678 of 21917)         | 3.4% (751 of 21917)         |

240

241

242

243

244

245

246

247

248

249

250

251

252

253

254

255

256 **Supplementary Table 13: LMICs with extreme differences in their rates of change across subnational districts**

| LMICs with at least 2.5% annualized decreases and increases across their districts (21)                                                                                                                                                                               | LMICs with at least 5% annualized decreases and increases across their districts (21) |
|-----------------------------------------------------------------------------------------------------------------------------------------------------------------------------------------------------------------------------------------------------------------------|---------------------------------------------------------------------------------------|
| Afghanistan<br>Bolivia<br>Burkina Faso<br>Central African Republic<br>Ecuador<br>Guatemala<br>Honduras<br>India<br>Indonesia<br>Iran<br>Laos<br>Mexico<br>Niger<br>Nigeria<br>Peru<br>South Africa<br>Sri Lanka<br>Tajikistan<br>Thailand<br>Timor-Leste<br>Venezuela | Guatemala                                                                             |

257  
 258  
 259  
 260  
 261  
 262

263

264

**Supplementary Table 14: Countries and administrative units achieving the WHO GNT of reducing anaemia prevalence among WRA by 50% prevalence by 2018 and 2030 (with a baseline year of 2012) with high probability (>95%).**

265

266

This table is sorted separately for 2018 and 2030 by region, within region by country, within country by province, and within

267

province by district. If District is NA, then the row refers to a Province, and if both District and Province is NA, then the row refers to

268

a Country.

| Region                      | 2018    |            |                           | 2030    |            |                 |
|-----------------------------|---------|------------|---------------------------|---------|------------|-----------------|
|                             | Country | Province   | District                  | County  | Province   | District        |
| <b>Andean South America</b> | Bolivia | Chuquisaca | NA                        | Bolivia | Chuquisaca | NA              |
| <b>Andean South America</b> | Bolivia | Chuquisaca | Oropeza                   | Bolivia | Chuquisaca | Azurduy         |
| <b>Andean South America</b> | Bolivia | Chuquisaca | Yamparaez                 | Bolivia | Chuquisaca | Belisario Boeto |
| <b>Andean South America</b> | Bolivia | Chuquisaca | Zudanez                   | Bolivia | Chuquisaca | Hernando Siles  |
| <b>Andean South America</b> | Bolivia | Cochabamba | Arani                     | Bolivia | Chuquisaca | Nor Cinti       |
| <b>Andean South America</b> | Bolivia | Cochabamba | Quillacollo               | Bolivia | Chuquisaca | Oropeza         |
| <b>Andean South America</b> | Bolivia | La Paz     | NA                        | Bolivia | Chuquisaca | Tomina          |
| <b>Andean South America</b> | Bolivia | La Paz     | Bautista Saavedra         | Bolivia | Chuquisaca | Yamparaez       |
| <b>Andean South America</b> | Bolivia | La Paz     | Camacho                   | Bolivia | Chuquisaca | Zudanez         |
| <b>Andean South America</b> | Bolivia | La Paz     | Franz Tamayo              | Bolivia | Cochabamba | Arani           |
| <b>Andean South America</b> | Bolivia | La Paz     | General Jose Manuel Pando | Bolivia | Cochabamba | Campero         |

|                             |          |               |                    |         |            |                           |
|-----------------------------|----------|---------------|--------------------|---------|------------|---------------------------|
| <b>Andean South America</b> | Bolivia  | La Paz        | Ingavi             | Bolivia | Cochabamba | Chapare                   |
| <b>Andean South America</b> | Bolivia  | La Paz        | Larecaja           | Bolivia | Cochabamba | Mizque                    |
| <b>Andean South America</b> | Bolivia  | La Paz        | Los Andes          | Bolivia | Cochabamba | Tiraque                   |
| <b>Andean South America</b> | Bolivia  | La Paz        | Manco Kapac        | Bolivia | La Paz     | NA                        |
| <b>Andean South America</b> | Bolivia  | La Paz        | Munecas            | Bolivia | La Paz     | Bautista Saavedra         |
| <b>Andean South America</b> | Bolivia  | La Paz        | Murillo            | Bolivia | La Paz     | Camacho                   |
| <b>Andean South America</b> | Bolivia  | La Paz        | Nor Yungas         | Bolivia | La Paz     | Caranavi                  |
| <b>Andean South America</b> | Bolivia  | La Paz        | Omasuyos           | Bolivia | La Paz     | Franz Tamayo              |
| <b>Andean South America</b> | Bolivia  | La Paz        | Pacajes            | Bolivia | La Paz     | General Jose Manuel Pando |
| <b>Andean South America</b> | Bolivia  | Lake Titicaca | NA                 | Bolivia | La Paz     | Ingavi                    |
| <b>Andean South America</b> | Bolivia  | Lake Titicaca | Lake Titicaca      | Bolivia | La Paz     | Larecaja                  |
| <b>Andean South America</b> | Bolivia  | Potosi        | Charcas            | Bolivia | La Paz     | Los Andes                 |
| <b>Andean South America</b> | Bolivia  | Potosi        | Cornelio Saavedra  | Bolivia | La Paz     | Manco Kapac               |
| <b>Andean South America</b> | Bolivia  | Potosi        | Jose Maria Linares | Bolivia | La Paz     | Munecas                   |
| <b>Andean South America</b> | Colombia | NA            | NA                 | Bolivia | La Paz     | Murillo                   |



|                             |          |           |             |          |               |                    |
|-----------------------------|----------|-----------|-------------|----------|---------------|--------------------|
| <b>Andean South America</b> | Colombia | Antioquia | NA          | Bolivia  | La Paz        | Nor Yungas         |
| <b>Andean South America</b> | Colombia | Antioquia | Abejorral   | Bolivia  | La Paz        | Omasuyos           |
| <b>Andean South America</b> | Colombia | Antioquia | Abriaquí    | Bolivia  | La Paz        | Sud Yungas         |
| <b>Andean South America</b> | Colombia | Antioquia | Alejandría  | Bolivia  | Lake Titicaca | NA                 |
| <b>Andean South America</b> | Colombia | Antioquia | Amagá       | Bolivia  | Lake Titicaca | Lake Titicaca      |
| <b>Andean South America</b> | Colombia | Antioquia | Amalfi      | Bolivia  | Potosi        | NA                 |
| <b>Andean South America</b> | Colombia | Antioquia | Andes       | Bolivia  | Potosi        | Charcas            |
| <b>Andean South America</b> | Colombia | Antioquia | Angelópolis | Bolivia  | Potosi        | Chayanta           |
| <b>Andean South America</b> | Colombia | Antioquia | Angostura   | Bolivia  | Potosi        | Cornelio Saavedra  |
| <b>Andean South America</b> | Colombia | Antioquia | Anzá        | Bolivia  | Potosi        | Jose Maria Linares |
| <b>Andean South America</b> | Colombia | Antioquia | Armenia     | Bolivia  | Potosi        | Tomas Frias        |
| <b>Andean South America</b> | Colombia | Antioquia | Bello       | Colombia | Antioquia     | NA                 |
| <b>Andean South America</b> | Colombia | Antioquia | Belmira     | Colombia | Antioquia     | Abejorral          |
| <b>Andean South America</b> | Colombia | Antioquia | Betania     | Colombia | Antioquia     | Andes              |
| <b>Andean South America</b> | Colombia | Antioquia | Betulia     | Colombia | Antioquia     | Angelópolis        |

|                             |          |           |                       |          |           |             |
|-----------------------------|----------|-----------|-----------------------|----------|-----------|-------------|
| <b>Andean South America</b> | Colombia | Antioquia | Bolívar               | Colombia | Antioquia | Anzá        |
| <b>Andean South America</b> | Colombia | Antioquia | Buriticá              | Colombia | Antioquia | Betania     |
| <b>Andean South America</b> | Colombia | Antioquia | Caicedo               | Colombia | Antioquia | Caicedo     |
| <b>Andean South America</b> | Colombia | Antioquia | Caldas                | Colombia | Antioquia | Concordia   |
| <b>Andean South America</b> | Colombia | Antioquia | Caracolí              | Colombia | Antioquia | Ebéjico     |
| <b>Andean South America</b> | Colombia | Antioquia | Caramanta             | Colombia | Antioquia | Envigado    |
| <b>Andean South America</b> | Colombia | Antioquia | Carolina del Principe | Colombia | Antioquia | Heliconia   |
| <b>Andean South America</b> | Colombia | Antioquia | Caucasia              | Colombia | Antioquia | Nechí       |
| <b>Andean South America</b> | Colombia | Antioquia | Cañasgordas           | Colombia | Antioquia | Salgar      |
| <b>Andean South America</b> | Colombia | Antioquia | Cisneros              | Colombia | Antioquia | Titiribí    |
| <b>Andean South America</b> | Colombia | Antioquia | Cocorná               | Colombia | Antioquia | Urrao       |
| <b>Andean South America</b> | Colombia | Antioquia | Concepción            | Colombia | Antioquia | Valparaíso  |
| <b>Andean South America</b> | Colombia | Antioquia | Concordia             | Colombia | Antioquia | Venecia     |
| <b>Andean South America</b> | Colombia | Antioquia | Cáceres               | Colombia | Bolívar   | Achí        |
| <b>Andean South America</b> | Colombia | Antioquia | Dabeiba               | Colombia | Bolívar   | Montecristo |

|                             |          |           |                      |          |        |                   |
|-----------------------------|----------|-----------|----------------------|----------|--------|-------------------|
| <b>Andean South America</b> | Colombia | Antioquia | Don Matías           | Colombia | Nariño | NA                |
| <b>Andean South America</b> | Colombia | Antioquia | Ebéjico              | Colombia | Nariño | Aldana            |
| <b>Andean South America</b> | Colombia | Antioquia | El Bagre             | Colombia | Nariño | Barbacoas         |
| <b>Andean South America</b> | Colombia | Antioquia | El Carmen de Viboral | Colombia | Nariño | Contadero         |
| <b>Andean South America</b> | Colombia | Antioquia | El Santuario         | Colombia | Nariño | Cuaspué           |
| <b>Andean South America</b> | Colombia | Antioquia | Entreríos            | Colombia | Nariño | Cumbal            |
| <b>Andean South America</b> | Colombia | Antioquia | Envigado             | Colombia | Nariño | El Charco         |
| <b>Andean South America</b> | Colombia | Antioquia | Frontino             | Colombia | Nariño | El Rosario        |
| <b>Andean South America</b> | Colombia | Antioquia | Giraldo              | Colombia | Nariño | Francisco Pizarro |
| <b>Andean South America</b> | Colombia | Antioquia | Granada              | Colombia | Nariño | Guachucal         |
| <b>Andean South America</b> | Colombia | Antioquia | Guadalupe            | Colombia | Nariño | Guaitarilla       |
| <b>Andean South America</b> | Colombia | Antioquia | Guarne               | Colombia | Nariño | Gualmatán         |
| <b>Andean South America</b> | Colombia | Antioquia | Gómez Plata          | Colombia | Nariño | Iles              |
| <b>Andean South America</b> | Colombia | Antioquia | Heliconia            | Colombia | Nariño | Imués             |
| <b>Andean South America</b> | Colombia | Antioquia | Hispania             | Colombia | Nariño | Ipiales           |

|                             |          |           |                   |          |        |                      |
|-----------------------------|----------|-----------|-------------------|----------|--------|----------------------|
| <b>Andean South America</b> | Colombia | Antioquia | Itagüí            | Colombia | Nariño | La Tola              |
| <b>Andean South America</b> | Colombia | Antioquia | Jardín            | Colombia | Nariño | Leiva                |
| <b>Andean South America</b> | Colombia | Antioquia | Jericó            | Colombia | Nariño | Magüí                |
| <b>Andean South America</b> | Colombia | Antioquia | La Ceja           | Colombia | Nariño | Mosquera             |
| <b>Andean South America</b> | Colombia | Antioquia | La Estrella       | Colombia | Nariño | Olaya Herrera        |
| <b>Andean South America</b> | Colombia | Antioquia | La Unión de Sucre | Colombia | Nariño | Ospina               |
| <b>Andean South America</b> | Colombia | Antioquia | Liborina          | Colombia | Nariño | Potosí               |
| <b>Andean South America</b> | Colombia | Antioquia | Marinilla         | Colombia | Nariño | Pupiales             |
| <b>Andean South America</b> | Colombia | Antioquia | Medellín          | Colombia | Nariño | Ricaurte             |
| <b>Andean South America</b> | Colombia | Antioquia | Montebello        | Colombia | Nariño | Roberto Payán        |
| <b>Andean South America</b> | Colombia | Antioquia | Murindó           | Colombia | Nariño | San Bernardo         |
| <b>Andean South America</b> | Colombia | Antioquia | Mutatá            | Colombia | Nariño | San Juan de Pasto    |
| <b>Andean South America</b> | Colombia | Antioquia | Nechí             | Colombia | Nariño | San Pedro de Cartago |
| <b>Andean South America</b> | Colombia | Antioquia | Pequé             | Colombia | Nariño | Santa Bárbara        |
| <b>Andean South America</b> | Colombia | Antioquia | Pueblorrico       | Colombia | Nariño | Sapuyes              |

|                             |          |           |                           |          |           |              |
|-----------------------------|----------|-----------|---------------------------|----------|-----------|--------------|
| <b>Andean South America</b> | Colombia | Antioquia | Retiro                    | Colombia | Nariño    | Tangua       |
| <b>Andean South America</b> | Colombia | Antioquia | Rionegro                  | Colombia | Nariño    | Tumaco       |
| <b>Andean South America</b> | Colombia | Antioquia | Sabanalarga               | Colombia | Nariño    | Túquerres    |
| <b>Andean South America</b> | Colombia | Antioquia | Sabaneta                  | Colombia | Nariño    | Yacuanquer   |
| <b>Andean South America</b> | Colombia | Antioquia | Salgar                    | Colombia | Risaralda | Guática      |
| <b>Andean South America</b> | Colombia | Antioquia | San Carlos                | Colombia | Santander | Aratoca      |
| <b>Andean South America</b> | Colombia | Antioquia | San Jerónimo              | Colombia | Santander | Barichara    |
| <b>Andean South America</b> | Colombia | Antioquia | San José de la Montaña    | Colombia | Santander | Cabrera      |
| <b>Andean South America</b> | Colombia | Antioquia | San Pedro de los Milagros | Colombia | Santander | Cerrito      |
| <b>Andean South America</b> | Colombia | Antioquia | San Rafael                | Colombia | Santander | Charalá      |
| <b>Andean South America</b> | Colombia | Antioquia | San Roque                 | Colombia | Santander | Chimá        |
| <b>Andean South America</b> | Colombia | Antioquia | San Vicente               | Colombia | Santander | Confines     |
| <b>Andean South America</b> | Colombia | Antioquia | Santa Rosa de Osos        | Colombia | Santander | Contratación |
| <b>Andean South America</b> | Colombia | Antioquia | Santo Domingo             | Colombia | Santander | Galán        |
| <b>Andean South America</b> | Colombia | Antioquia | Sopetrán                  | Colombia | Santander | Guadalupe    |

|                             |          |           |             |          |                 |                    |
|-----------------------------|----------|-----------|-------------|----------|-----------------|--------------------|
| <b>Andean South America</b> | Colombia | Antioquia | Tarazá      | Colombia | Santander       | Guapotá            |
| <b>Andean South America</b> | Colombia | Antioquia | Tarso       | Colombia | Santander       | Hato               |
| <b>Andean South America</b> | Colombia | Antioquia | Titiribí    | Colombia | Santander       | Jordán             |
| <b>Andean South America</b> | Colombia | Antioquia | Toledo      | Colombia | Santander       | Los Santos         |
| <b>Andean South America</b> | Colombia | Antioquia | Támesis     | Colombia | Santander       | Macaravita         |
| <b>Andean South America</b> | Colombia | Antioquia | Uramita     | Colombia | Santander       | Ocamonte           |
| <b>Andean South America</b> | Colombia | Antioquia | Urrao       | Colombia | Santander       | Oiba               |
| <b>Andean South America</b> | Colombia | Antioquia | Valparaíso  | Colombia | Santander       | Palmar             |
| <b>Andean South America</b> | Colombia | Antioquia | Venecia     | Colombia | Santander       | Palmas del Socorro |
| <b>Andean South America</b> | Colombia | Antioquia | Yarumal     | Colombia | Santander       | Pinchote           |
| <b>Andean South America</b> | Colombia | Bolívar   | Montecristo | Colombia | Santander       | Páramo             |
| <b>Andean South America</b> | Colombia | Boyacá    | Duitama     | Colombia | Santander       | Socorro            |
| <b>Andean South America</b> | Colombia | Caldas    | NA          | Colombia | Santander       | Villanueva         |
| <b>Andean South America</b> | Colombia | Caldas    | Aguadas     | Colombia | Santander       | Zapatoca           |
| <b>Andean South America</b> | Colombia | Caldas    | Anserma     | Colombia | Valle del Cauca | Andalucía          |

|                             |          |        |             |          |                 |            |
|-----------------------------|----------|--------|-------------|----------|-----------------|------------|
| <b>Andean South America</b> | Colombia | Caldas | Aranzazú    | Colombia | Valle del Cauca | Bolívar    |
| <b>Andean South America</b> | Colombia | Caldas | Belalcázar  | Ecuador  | Azuay           | Nabón      |
| <b>Andean South America</b> | Colombia | Caldas | Chinchiná   | Ecuador  | El Oro          | Balsas     |
| <b>Andean South America</b> | Colombia | Caldas | Filadelfia  | Ecuador  | El Oro          | Chilla     |
| <b>Andean South America</b> | Colombia | Caldas | La Merced   | Ecuador  | El Oro          | El Guabo   |
| <b>Andean South America</b> | Colombia | Caldas | Manizales   | Ecuador  | El Oro          | Las Lajas  |
| <b>Andean South America</b> | Colombia | Caldas | Manzanares  | Ecuador  | El Oro          | Marcabellí |
| <b>Andean South America</b> | Colombia | Caldas | Marquetalia | Ecuador  | El Oro          | Pasaje     |
| <b>Andean South America</b> | Colombia | Caldas | Marulanda   | Ecuador  | El Oro          | Piñas      |
| <b>Andean South America</b> | Colombia | Caldas | Neira       | Ecuador  | El Oro          | Portovelo  |
| <b>Andean South America</b> | Colombia | Caldas | Palestina   | Ecuador  | El Oro          | Santa Rosa |
| <b>Andean South America</b> | Colombia | Caldas | Pácora      | Ecuador  | El Oro          | Zaruma     |
| <b>Andean South America</b> | Colombia | Caldas | Riosucio    | Ecuador  | Loja            | NA         |
| <b>Andean South America</b> | Colombia | Caldas | Risaralda   | Ecuador  | Loja            | Calvas     |
| <b>Andean South America</b> | Colombia | Caldas | Salamina    | Ecuador  | Loja            | Catamayo   |

|                             |          |              |            |         |                  |                      |
|-----------------------------|----------|--------------|------------|---------|------------------|----------------------|
| <b>Andean South America</b> | Colombia | Caldas       | Villamaría | Ecuador | Loja             | Chaguarpamba         |
| <b>Andean South America</b> | Colombia | Caldas       | Viterbo    | Ecuador | Loja             | Espíndola            |
| <b>Andean South America</b> | Colombia | Cauca        | Argelia    | Ecuador | Loja             | Gonzanamá            |
| <b>Andean South America</b> | Colombia | Cauca        | Balboa     | Ecuador | Loja             | Olmedo               |
| <b>Andean South America</b> | Colombia | Cauca        | La Sierra  | Ecuador | Loja             | Paltas               |
| <b>Andean South America</b> | Colombia | Cauca        | Rosas      | Ecuador | Loja             | Quilanga             |
| <b>Andean South America</b> | Colombia | Cauca        | Sotará     | Ecuador | Loja             | Saraguro             |
| <b>Andean South America</b> | Colombia | Cundinamarca | Chipaque   | Ecuador | Loja             | Sozoranga            |
| <b>Andean South America</b> | Colombia | Cundinamarca | Choachí    | Ecuador | Zamora Chinchipe | NA                   |
| <b>Andean South America</b> | Colombia | Cundinamarca | Manta      | Ecuador | Zamora Chinchipe | Centinela del Cóndor |
| <b>Andean South America</b> | Colombia | Cundinamarca | Ubaque     | Ecuador | Zamora Chinchipe | Chinchipe            |
| <b>Andean South America</b> | Colombia | Nariño       | NA         | Ecuador | Zamora Chinchipe | Yacuambi             |
| <b>Andean South America</b> | Colombia | Nariño       | Albán      | Ecuador | Zamora Chinchipe | Yantzaza             |
| <b>Andean South America</b> | Colombia | Nariño       | Aldana     | Peru    | Amazonas         | NA                   |
| <b>Andean South America</b> | Colombia | Nariño       | Ancuyá     | Peru    | Amazonas         | Bongará              |



|                             |          |        |                    |      |          |                           |
|-----------------------------|----------|--------|--------------------|------|----------|---------------------------|
| <b>Andean South America</b> | Colombia | Nariño | Arboleda           | Peru | Amazonas | Chachapoyas               |
| <b>Andean South America</b> | Colombia | Nariño | Barbacoas          | Peru | Amazonas | Luya                      |
| <b>Andean South America</b> | Colombia | Nariño | Belén              | Peru | Amazonas | Rodríguez de Mendoza      |
| <b>Andean South America</b> | Colombia | Nariño | Buesaco            | Peru | Amazonas | Utcubamba                 |
| <b>Andean South America</b> | Colombia | Nariño | Consacá            | Peru | Ancash   | NA                        |
| <b>Andean South America</b> | Colombia | Nariño | Contadero          | Peru | Ancash   | Aija                      |
| <b>Andean South America</b> | Colombia | Nariño | Cuaspud            | Peru | Ancash   | Antonio Raymondi          |
| <b>Andean South America</b> | Colombia | Nariño | Cumbal             | Peru | Ancash   | Asunción                  |
| <b>Andean South America</b> | Colombia | Nariño | Cumbitara          | Peru | Ancash   | Bolognesi                 |
| <b>Andean South America</b> | Colombia | Nariño | Córdoba            | Peru | Ancash   | Carhuaz                   |
| <b>Andean South America</b> | Colombia | Nariño | El Charco          | Peru | Ancash   | Carlos Fermin Fitzcarrald |
| <b>Andean South America</b> | Colombia | Nariño | El Rosario         | Peru | Ancash   | Corongo                   |
| <b>Andean South America</b> | Colombia | Nariño | El Tablón de Gomez | Peru | Ancash   | Huaraz                    |
| <b>Andean South America</b> | Colombia | Nariño | El Tambo           | Peru | Ancash   | Huari                     |
| <b>Andean South America</b> | Colombia | Nariño | Francisco Pizarro  | Peru | Ancash   | Huaylas                   |

|                             |          |        |             |      |          |                    |
|-----------------------------|----------|--------|-------------|------|----------|--------------------|
| <b>Andean South America</b> | Colombia | Nariño | Funes       | Peru | Ancash   | Mariscal Luzuriaga |
| <b>Andean South America</b> | Colombia | Nariño | Guachucal   | Peru | Ancash   | Ocros              |
| <b>Andean South America</b> | Colombia | Nariño | Guaitarilla | Peru | Ancash   | Pallasca           |
| <b>Andean South America</b> | Colombia | Nariño | Gualmatán   | Peru | Ancash   | Pomabamba          |
| <b>Andean South America</b> | Colombia | Nariño | Iles        | Peru | Ancash   | Recuay             |
| <b>Andean South America</b> | Colombia | Nariño | Imués       | Peru | Ancash   | Sihuas             |
| <b>Andean South America</b> | Colombia | Nariño | Ipiales     | Peru | Ancash   | Yungay             |
| <b>Andean South America</b> | Colombia | Nariño | La Cruz     | Peru | Apurímac | NA                 |
| <b>Andean South America</b> | Colombia | Nariño | La Florida  | Peru | Apurímac | Abancay            |
| <b>Andean South America</b> | Colombia | Nariño | La Llanada  | Peru | Apurímac | Andahuaylas        |
| <b>Andean South America</b> | Colombia | Nariño | La Tola     | Peru | Apurímac | Antabamba          |
| <b>Andean South America</b> | Colombia | Nariño | Leiva       | Peru | Apurímac | Aymaraes           |
| <b>Andean South America</b> | Colombia | Nariño | Los Andes   | Peru | Apurímac | Chincheros         |
| <b>Andean South America</b> | Colombia | Nariño | Magüí       | Peru | Apurímac | Cotabambas         |
| <b>Andean South America</b> | Colombia | Nariño | Mallama     | Peru | Apurímac | Grau               |

|                             |          |        |                      |      |          |               |
|-----------------------------|----------|--------|----------------------|------|----------|---------------|
| <b>Andean South America</b> | Colombia | Nariño | Mosquera             | Peru | Arequipa | NA            |
| <b>Andean South America</b> | Colombia | Nariño | Olaya Herrera        | Peru | Arequipa | Arequipa      |
| <b>Andean South America</b> | Colombia | Nariño | Ospina               | Peru | Arequipa | Camaná        |
| <b>Andean South America</b> | Colombia | Nariño | Policarpa            | Peru | Arequipa | Caravelí      |
| <b>Andean South America</b> | Colombia | Nariño | Potosí               | Peru | Arequipa | Castilla      |
| <b>Andean South America</b> | Colombia | Nariño | Providencia          | Peru | Arequipa | Caylloma      |
| <b>Andean South America</b> | Colombia | Nariño | Puerres              | Peru | Arequipa | Condesuyos    |
| <b>Andean South America</b> | Colombia | Nariño | Pupiales             | Peru | Arequipa | Islay         |
| <b>Andean South America</b> | Colombia | Nariño | Ricaurte             | Peru | Arequipa | La Unión      |
| <b>Andean South America</b> | Colombia | Nariño | Roberto Payán        | Peru | Ayacucho | NA            |
| <b>Andean South America</b> | Colombia | Nariño | San Bernardo         | Peru | Ayacucho | Cangallo      |
| <b>Andean South America</b> | Colombia | Nariño | San Juan de Pasto    | Peru | Ayacucho | Huamanga      |
| <b>Andean South America</b> | Colombia | Nariño | San Lorenzo          | Peru | Ayacucho | Huanca Sancos |
| <b>Andean South America</b> | Colombia | Nariño | San Pablo            | Peru | Ayacucho | Huanta        |
| <b>Andean South America</b> | Colombia | Nariño | San Pedro de Cartago | Peru | Ayacucho | La Mar        |

|                             |          |                    |                        |      |           |                      |
|-----------------------------|----------|--------------------|------------------------|------|-----------|----------------------|
| <b>Andean South America</b> | Colombia | Nariño             | Santa Bárbara          | Peru | Ayacucho  | Lucanas              |
| <b>Andean South America</b> | Colombia | Nariño             | Santa Cruz             | Peru | Ayacucho  | Parinacochas         |
| <b>Andean South America</b> | Colombia | Nariño             | Sapuyes                | Peru | Ayacucho  | Paucar del Sara Sara |
| <b>Andean South America</b> | Colombia | Nariño             | Tangua                 | Peru | Ayacucho  | Sucre                |
| <b>Andean South America</b> | Colombia | Nariño             | Tumaco                 | Peru | Ayacucho  | Victor Fajardo       |
| <b>Andean South America</b> | Colombia | Nariño             | Túquerres              | Peru | Ayacucho  | Vilcas Huamán        |
| <b>Andean South America</b> | Colombia | Nariño             | Yacuanquer             | Peru | Cajamarca | NA                   |
| <b>Andean South America</b> | Colombia | Norte de Santander | Santo Domingo de Silos | Peru | Cajamarca | Cajabamba            |
| <b>Andean South America</b> | Colombia | Putumayo           | Colón                  | Peru | Cajamarca | Cajamarca            |
| <b>Andean South America</b> | Colombia | Quindío            | NA                     | Peru | Cajamarca | Celendín             |
| <b>Andean South America</b> | Colombia | Quindío            | Armenia                | Peru | Cajamarca | Chota                |
| <b>Andean South America</b> | Colombia | Quindío            | Calarcá                | Peru | Cajamarca | Contumazá            |
| <b>Andean South America</b> | Colombia | Quindío            | Circasia               | Peru | Cajamarca | Cutervo              |
| <b>Andean South America</b> | Colombia | Quindío            | Córdoba                | Peru | Cajamarca | Hualgayoc            |
| <b>Andean South America</b> | Colombia | Quindío            | Salento                | Peru | Cajamarca | Jaén                 |

|                             |          |           |                     |      |           |               |
|-----------------------------|----------|-----------|---------------------|------|-----------|---------------|
| <b>Andean South America</b> | Colombia | Risaralda | NA                  | Peru | Cajamarca | San Ignacio   |
| <b>Andean South America</b> | Colombia | Risaralda | Apía                | Peru | Cajamarca | San Marcos    |
| <b>Andean South America</b> | Colombia | Risaralda | Belén de Umbría     | Peru | Cajamarca | San Miguel    |
| <b>Andean South America</b> | Colombia | Risaralda | Dosquebradas        | Peru | Cajamarca | San Pablo     |
| <b>Andean South America</b> | Colombia | Risaralda | Guática             | Peru | Cajamarca | Santa Cruz    |
| <b>Andean South America</b> | Colombia | Risaralda | La Celia            | Peru | Cusco     | NA            |
| <b>Andean South America</b> | Colombia | Risaralda | La Virginia         | Peru | Cusco     | Acomayo       |
| <b>Andean South America</b> | Colombia | Risaralda | Marsella            | Peru | Cusco     | Anta          |
| <b>Andean South America</b> | Colombia | Risaralda | Mistrato            | Peru | Cusco     | Calca         |
| <b>Andean South America</b> | Colombia | Risaralda | Pereira             | Peru | Cusco     | Canas         |
| <b>Andean South America</b> | Colombia | Risaralda | Pueblo Rico         | Peru | Cusco     | Canchis       |
| <b>Andean South America</b> | Colombia | Risaralda | Quinchía            | Peru | Cusco     | Chumbivilcas  |
| <b>Andean South America</b> | Colombia | Risaralda | Santa Rosa de Cabal | Peru | Cusco     | Cusco         |
| <b>Andean South America</b> | Colombia | Risaralda | Santuario           | Peru | Cusco     | Espinar       |
| <b>Andean South America</b> | Colombia | Santander | Aguada              | Peru | Cusco     | La Convención |

|                             |          |           |              |      |              |                |
|-----------------------------|----------|-----------|--------------|------|--------------|----------------|
| <b>Andean South America</b> | Colombia | Santander | Aratoca      | Peru | Cusco        | Paruro         |
| <b>Andean South America</b> | Colombia | Santander | Barbosa      | Peru | Cusco        | Paucartambo    |
| <b>Andean South America</b> | Colombia | Santander | Barichara    | Peru | Cusco        | Quispicanchi   |
| <b>Andean South America</b> | Colombia | Santander | Cabrera      | Peru | Cusco        | Urubamba       |
| <b>Andean South America</b> | Colombia | Santander | California   | Peru | Huancavelica | NA             |
| <b>Andean South America</b> | Colombia | Santander | Carcasí      | Peru | Huancavelica | Acobamba       |
| <b>Andean South America</b> | Colombia | Santander | Cepitá       | Peru | Huancavelica | Angaraes       |
| <b>Andean South America</b> | Colombia | Santander | Cerrito      | Peru | Huancavelica | Castrovirreyna |
| <b>Andean South America</b> | Colombia | Santander | Charalá      | Peru | Huancavelica | Churcampa      |
| <b>Andean South America</b> | Colombia | Santander | Chimá        | Peru | Huancavelica | Huancavelica   |
| <b>Andean South America</b> | Colombia | Santander | Chipatá      | Peru | Huancavelica | Huaytara       |
| <b>Andean South America</b> | Colombia | Santander | Concepción   | Peru | Huancavelica | Tayacaja       |
| <b>Andean South America</b> | Colombia | Santander | Confines     | Peru | Huánuco      | NA             |
| <b>Andean South America</b> | Colombia | Santander | Contratación | Peru | Huánuco      | Ambo           |
| <b>Andean South America</b> | Colombia | Santander | Coromoro     | Peru | Huánuco      | Dos de Mayo    |

|                             |          |           |              |      |         |             |
|-----------------------------|----------|-----------|--------------|------|---------|-------------|
| <b>Andean South America</b> | Colombia | Santander | Curití       | Peru | Huánuco | Huacaybamba |
| <b>Andean South America</b> | Colombia | Santander | El Guacamayo | Peru | Huánuco | Huamalíes   |
| <b>Andean South America</b> | Colombia | Santander | El Peñon     | Peru | Huánuco | Huenuco     |
| <b>Andean South America</b> | Colombia | Santander | Galán        | Peru | Huánuco | Lauricocha  |
| <b>Andean South America</b> | Colombia | Santander | Guaca        | Peru | Huánuco | Marañón     |
| <b>Andean South America</b> | Colombia | Santander | Guadalupe    | Peru | Huánuco | Pachitea    |
| <b>Andean South America</b> | Colombia | Santander | Guapotá      | Peru | Huánuco | Yarowilca   |
| <b>Andean South America</b> | Colombia | Santander | Güepsa       | Peru | Ica     | Ica         |
| <b>Andean South America</b> | Colombia | Santander | Hato         | Peru | Junín   | NA          |
| <b>Andean South America</b> | Colombia | Santander | Jordán       | Peru | Junín   | Chupaca     |
| <b>Andean South America</b> | Colombia | Santander | Los Santos   | Peru | Junín   | Concepción  |
| <b>Andean South America</b> | Colombia | Santander | Macaravita   | Peru | Junín   | Huancayo    |
| <b>Andean South America</b> | Colombia | Santander | Mogotes      | Peru | Junín   | Jauja       |
| <b>Andean South America</b> | Colombia | Santander | Molagavita   | Peru | Junín   | Junín       |
| <b>Andean South America</b> | Colombia | Santander | Ocamonte     | Peru | Junín   | Satipo      |

|                             |          |           |                     |      |             |                   |
|-----------------------------|----------|-----------|---------------------|------|-------------|-------------------|
| <b>Andean South America</b> | Colombia | Santander | Oiba                | Peru | Junín       | Tarma             |
| <b>Andean South America</b> | Colombia | Santander | Onzaga              | Peru | Junín       | Yauli             |
| <b>Andean South America</b> | Colombia | Santander | Palmar              | Peru | La Libertad | NA                |
| <b>Andean South America</b> | Colombia | Santander | Palmas del Socorro  | Peru | La Libertad | Bolívar           |
| <b>Andean South America</b> | Colombia | Santander | Pinchote            | Peru | La Libertad | Gran Chimú        |
| <b>Andean South America</b> | Colombia | Santander | Páramo              | Peru | La Libertad | Julcan            |
| <b>Andean South America</b> | Colombia | Santander | San Benito          | Peru | La Libertad | Otuzco            |
| <b>Andean South America</b> | Colombia | Santander | San Joaquín         | Peru | La Libertad | Pataz             |
| <b>Andean South America</b> | Colombia | Santander | San José de Miranda | Peru | La Libertad | Santiago de Chuco |
| <b>Andean South America</b> | Colombia | Santander | San Miguel          | Peru | La Libertad | Sánchez Carrión   |
| <b>Andean South America</b> | Colombia | Santander | Socorro             | Peru | Lima        | Cajatambo         |
| <b>Andean South America</b> | Colombia | Santander | Suaita              | Peru | Lima        | Canta             |
| <b>Andean South America</b> | Colombia | Santander | Sucre               | Peru | Lima        | Huarochari        |
| <b>Andean South America</b> | Colombia | Santander | Valle de San José   | Peru | Lima        | Oyon              |
| <b>Andean South America</b> | Colombia | Santander | Vetas               | Peru | Lima        | Yauyos            |



|                             |          |                 |                     |      |               |                        |
|-----------------------------|----------|-----------------|---------------------|------|---------------|------------------------|
| <b>Andean South America</b> | Colombia | Santander       | Villanueva          | Peru | Madre de Dios | NA                     |
| <b>Andean South America</b> | Colombia | Santander       | Zapatoca            | Peru | Madre de Dios | Manu                   |
| <b>Andean South America</b> | Colombia | Valle del Cauca | Andalucía           | Peru | Madre de Dios | Tahuamanu              |
| <b>Andean South America</b> | Colombia | Valle del Cauca | Bolívar             | Peru | Madre de Dios | Tambopata              |
| <b>Andean South America</b> | Colombia | Valle del Cauca | Bugalagrande        | Peru | Moquegua      | NA                     |
| <b>Andean South America</b> | Colombia | Valle del Cauca | El Águila           | Peru | Moquegua      | General Sánchez Cerro  |
| <b>Andean South America</b> | Colombia | Valle del Cauca | Guacarí             | Peru | Moquegua      | Mariscal Nieto         |
| <b>Andean South America</b> | Colombia | Valle del Cauca | Guadalajara de Buga | Peru | Pasco         | NA                     |
| <b>Andean South America</b> | Colombia | Valle del Cauca | La Cumbre           | Peru | Pasco         | Daniel Alcides Carrión |
| <b>Andean South America</b> | Colombia | Valle del Cauca | Pradera             | Peru | Pasco         | Pasco                  |
| <b>Andean South America</b> | Colombia | Valle del Cauca | Riofrío             | Peru | Piura         | Ayabaca                |
| <b>Andean South America</b> | Colombia | Valle del Cauca | Roldanillo          | Peru | Piura         | Huancabamba            |
| <b>Andean South America</b> | Colombia | Valle del Cauca | San Pedro           | Peru | Puno          | NA                     |
| <b>Andean South America</b> | Colombia | Valle del Cauca | Trujillo            | Peru | Puno          | Azángaro               |
| <b>Andean South America</b> | Colombia | Valle del Cauca | Tuluá               | Peru | Puno          | Carabaya               |

|                             |          |                 |              |      |       |                       |
|-----------------------------|----------|-----------------|--------------|------|-------|-----------------------|
| <b>Andean South America</b> | Colombia | Valle del Cauca | Yotoco       | Peru | Puno  | Chucuító              |
| <b>Andean South America</b> | Colombia | Valle del Cauca | Zarzal       | Peru | Puno  | El Collao             |
| <b>Andean South America</b> | Ecuador  | Azuay           | NA           | Peru | Puno  | Huancane              |
| <b>Andean South America</b> | Ecuador  | Azuay           | Chordeleg    | Peru | Puno  | Lago Titicaca         |
| <b>Andean South America</b> | Ecuador  | Azuay           | Cuenca       | Peru | Puno  | Lampa                 |
| <b>Andean South America</b> | Ecuador  | Azuay           | El Pan       | Peru | Puno  | Melgar                |
| <b>Andean South America</b> | Ecuador  | Azuay           | Girón        | Peru | Puno  | Moho                  |
| <b>Andean South America</b> | Ecuador  | Azuay           | Guachapala   | Peru | Puno  | Puno                  |
| <b>Andean South America</b> | Ecuador  | Azuay           | Gualaceo     | Peru | Puno  | San Antonio de Putina |
| <b>Andean South America</b> | Ecuador  | Azuay           | Nabón        | Peru | Puno  | San Román             |
| <b>Andean South America</b> | Ecuador  | Azuay           | Oña          | Peru | Puno  | Sandia                |
| <b>Andean South America</b> | Ecuador  | Azuay           | Paute        | Peru | Puno  | Yunguyo               |
| <b>Andean South America</b> | Ecuador  | Azuay           | Pucará       | Peru | Tacna | NA                    |
| <b>Andean South America</b> | Ecuador  | Azuay           | San Fernando | Peru | Tacna | Candarave             |
| <b>Andean South America</b> | Ecuador  | Azuay           | Santa Isabel | Peru | Tacna | Jorge Basadre         |

|                             |         |         |                    |           |          |                |
|-----------------------------|---------|---------|--------------------|-----------|----------|----------------|
| <b>Andean South America</b> | Ecuador | Azuay   | Sevilla de Oro     | Peru      | Tacna    | Tacna          |
| <b>Andean South America</b> | Ecuador | Azuay   | Sigsig             | Peru      | Tacna    | Tarata         |
| <b>Andean South America</b> | Ecuador | Bolivar | NA                 | Venezuela | Carabobo | Juan José Mora |
| <b>Andean South America</b> | Ecuador | Bolivar | Chillanes          | NA        | NA       | NA             |
| <b>Andean South America</b> | Ecuador | Bolivar | Chimbo             | NA        | NA       | NA             |
| <b>Andean South America</b> | Ecuador | Bolivar | Guaranda           | NA        | NA       | NA             |
| <b>Andean South America</b> | Ecuador | Bolivar | San Miguel         | NA        | NA       | NA             |
| <b>Andean South America</b> | Ecuador | Carchi  | NA                 | NA        | NA       | NA             |
| <b>Andean South America</b> | Ecuador | Carchi  | Espejo             | NA        | NA       | NA             |
| <b>Andean South America</b> | Ecuador | Carchi  | Montúfar           | NA        | NA       | NA             |
| <b>Andean South America</b> | Ecuador | Carchi  | San Pedro de Huaca | NA        | NA       | NA             |
| <b>Andean South America</b> | Ecuador | Carchi  | Tulcán             | NA        | NA       | NA             |
| <b>Andean South America</b> | Ecuador | Cañar   | NA                 | NA        | NA       | NA             |
| <b>Andean South America</b> | Ecuador | Cañar   | Azogues            | NA        | NA       | NA             |
| <b>Andean South America</b> | Ecuador | Cañar   | Biblián            | NA        | NA       | NA             |

|                             |         |            |            |    |    |    |
|-----------------------------|---------|------------|------------|----|----|----|
| <b>Andean South America</b> | Ecuador | Cañar      | Cañar      | NA | NA | NA |
| <b>Andean South America</b> | Ecuador | Cañar      | Déleg      | NA | NA | NA |
| <b>Andean South America</b> | Ecuador | Cañar      | El Tambo   | NA | NA | NA |
| <b>Andean South America</b> | Ecuador | Cañar      | Suscal     | NA | NA | NA |
| <b>Andean South America</b> | Ecuador | Chimborazo | NA         | NA | NA | NA |
| <b>Andean South America</b> | Ecuador | Chimborazo | Alausí     | NA | NA | NA |
| <b>Andean South America</b> | Ecuador | Chimborazo | Chambo     | NA | NA | NA |
| <b>Andean South America</b> | Ecuador | Chimborazo | Chunchi    | NA | NA | NA |
| <b>Andean South America</b> | Ecuador | Chimborazo | Colta      | NA | NA | NA |
| <b>Andean South America</b> | Ecuador | Chimborazo | Guamote    | NA | NA | NA |
| <b>Andean South America</b> | Ecuador | Chimborazo | Guano      | NA | NA | NA |
| <b>Andean South America</b> | Ecuador | Chimborazo | Pallatanga | NA | NA | NA |
| <b>Andean South America</b> | Ecuador | Chimborazo | Penipe     | NA | NA | NA |
| <b>Andean South America</b> | Ecuador | Chimborazo | Riobamba   | NA | NA | NA |
| <b>Andean South America</b> | Ecuador | Cotopaxi   | NA         | NA | NA | NA |

|                             |         |          |           |    |    |    |
|-----------------------------|---------|----------|-----------|----|----|----|
| <b>Andean South America</b> | Ecuador | Cotopaxi | Latacunga | NA | NA | NA |
| <b>Andean South America</b> | Ecuador | Cotopaxi | Pujilí    | NA | NA | NA |
| <b>Andean South America</b> | Ecuador | Cotopaxi | Salcedo   | NA | NA | NA |
| <b>Andean South America</b> | Ecuador | Cotopaxi | Saquisilí | NA | NA | NA |
| <b>Andean South America</b> | Ecuador | Cotopaxi | Saquisilí | NA | NA | NA |
| <b>Andean South America</b> | Ecuador | Cotopaxi | Sigchos   | NA | NA | NA |
| <b>Andean South America</b> | Ecuador | El Oro   | Atahualpa | NA | NA | NA |
| <b>Andean South America</b> | Ecuador | El Oro   | Balsas    | NA | NA | NA |
| <b>Andean South America</b> | Ecuador | El Oro   | Chilla    | NA | NA | NA |
| <b>Andean South America</b> | Ecuador | El Oro   | Marcabelí | NA | NA | NA |
| <b>Andean South America</b> | Ecuador | El Oro   | Pasaje    | NA | NA | NA |
| <b>Andean South America</b> | Ecuador | El Oro   | Piñas     | NA | NA | NA |
| <b>Andean South America</b> | Ecuador | El Oro   | Portovelo | NA | NA | NA |
| <b>Andean South America</b> | Ecuador | El Oro   | Zaruma    | NA | NA | NA |
| <b>Andean South America</b> | Ecuador | Imbabura | NA        | NA | NA | NA |

|                             |         |          |              |    |    |    |
|-----------------------------|---------|----------|--------------|----|----|----|
| <b>Andean South America</b> | Ecuador | Imbabura | Antonio Ante | NA | NA | NA |
| <b>Andean South America</b> | Ecuador | Imbabura | Ibarra       | NA | NA | NA |
| <b>Andean South America</b> | Ecuador | Imbabura | Otavalo      | NA | NA | NA |
| <b>Andean South America</b> | Ecuador | Loja     | NA           | NA | NA | NA |
| <b>Andean South America</b> | Ecuador | Loja     | Calvas       | NA | NA | NA |
| <b>Andean South America</b> | Ecuador | Loja     | Catamayo     | NA | NA | NA |
| <b>Andean South America</b> | Ecuador | Loja     | Chaguarpamba | NA | NA | NA |
| <b>Andean South America</b> | Ecuador | Loja     | Espíndola    | NA | NA | NA |
| <b>Andean South America</b> | Ecuador | Loja     | Gonzanamá    | NA | NA | NA |
| <b>Andean South America</b> | Ecuador | Loja     | Loja         | NA | NA | NA |
| <b>Andean South America</b> | Ecuador | Loja     | Olmedo       | NA | NA | NA |
| <b>Andean South America</b> | Ecuador | Loja     | Paltas       | NA | NA | NA |
| <b>Andean South America</b> | Ecuador | Loja     | Quilanga     | NA | NA | NA |
| <b>Andean South America</b> | Ecuador | Loja     | Saraguro     | NA | NA | NA |
| <b>Andean South America</b> | Ecuador | Loja     | Sozoranga    | NA | NA | NA |

|                             |         |                     |                      |    |    |    |
|-----------------------------|---------|---------------------|----------------------|----|----|----|
| <b>Andean South America</b> | Ecuador | Pichincha           | NA                   | NA | NA | NA |
| <b>Andean South America</b> | Ecuador | Pichincha           | Mejía                | NA | NA | NA |
| <b>Andean South America</b> | Ecuador | Pichincha           | Quito                | NA | NA | NA |
| <b>Andean South America</b> | Ecuador | Pichincha           | Rumiñahui            | NA | NA | NA |
| <b>Andean South America</b> | Ecuador | Tungurahua          | NA                   | NA | NA | NA |
| <b>Andean South America</b> | Ecuador | Tungurahua          | Ambato               | NA | NA | NA |
| <b>Andean South America</b> | Ecuador | Tungurahua          | Baños de Agua Santa  | NA | NA | NA |
| <b>Andean South America</b> | Ecuador | Tungurahua          | Cevallos             | NA | NA | NA |
| <b>Andean South America</b> | Ecuador | Tungurahua          | Mocha                | NA | NA | NA |
| <b>Andean South America</b> | Ecuador | Tungurahua          | Patate               | NA | NA | NA |
| <b>Andean South America</b> | Ecuador | Tungurahua          | Quero                | NA | NA | NA |
| <b>Andean South America</b> | Ecuador | Tungurahua          | San Pedro de Pelileo | NA | NA | NA |
| <b>Andean South America</b> | Ecuador | Tungurahua          | Santiago de Pillaro  | NA | NA | NA |
| <b>Andean South America</b> | Ecuador | Tungurahua          | Tisaleo              | NA | NA | NA |
| <b>Andean South America</b> | Ecuador | Zamora<br>Chinchipe | NA                   | NA | NA | NA |

|                             |         |                  |                      |    |    |    |
|-----------------------------|---------|------------------|----------------------|----|----|----|
| <b>Andean South America</b> | Ecuador | Zamora Chinchipe | Centinela del Cóndor | NA | NA | NA |
| <b>Andean South America</b> | Ecuador | Zamora Chinchipe | Chinchipe            | NA | NA | NA |
| <b>Andean South America</b> | Ecuador | Zamora Chinchipe | Yacuambi             | NA | NA | NA |
| <b>Andean South America</b> | Ecuador | Zamora Chinchipe | Yantzaza             | NA | NA | NA |
| <b>Andean South America</b> | Ecuador | Zamora Chinchipe | Zamora               | NA | NA | NA |
| <b>Andean South America</b> | Peru    | Amazonas         | NA                   | NA | NA | NA |
| <b>Andean South America</b> | Peru    | Amazonas         | Bongará              | NA | NA | NA |
| <b>Andean South America</b> | Peru    | Amazonas         | Chachapoyas          | NA | NA | NA |
| <b>Andean South America</b> | Peru    | Amazonas         | Luya                 | NA | NA | NA |
| <b>Andean South America</b> | Peru    | Amazonas         | Rodríguez de Mendoza | NA | NA | NA |
| <b>Andean South America</b> | Peru    | Amazonas         | Utcubamba            | NA | NA | NA |
| <b>Andean South America</b> | Peru    | Ancash           | NA                   | NA | NA | NA |
| <b>Andean South America</b> | Peru    | Ancash           | Aija                 | NA | NA | NA |
| <b>Andean South America</b> | Peru    | Ancash           | Antonio Raymondi     | NA | NA | NA |
| <b>Andean South America</b> | Peru    | Ancash           | Asunción             | NA | NA | NA |



|                             |      |          |                           |    |    |    |
|-----------------------------|------|----------|---------------------------|----|----|----|
| <b>Andean South America</b> | Peru | Ancash   | Bolognesi                 | NA | NA | NA |
| <b>Andean South America</b> | Peru | Ancash   | Carhuaz                   | NA | NA | NA |
| <b>Andean South America</b> | Peru | Ancash   | Carlos Fermin Fitzcarrald | NA | NA | NA |
| <b>Andean South America</b> | Peru | Ancash   | Corongo                   | NA | NA | NA |
| <b>Andean South America</b> | Peru | Ancash   | Huaraz                    | NA | NA | NA |
| <b>Andean South America</b> | Peru | Ancash   | Huari                     | NA | NA | NA |
| <b>Andean South America</b> | Peru | Ancash   | Huaylas                   | NA | NA | NA |
| <b>Andean South America</b> | Peru | Ancash   | Mariscal Luzuriaga        | NA | NA | NA |
| <b>Andean South America</b> | Peru | Ancash   | Ocros                     | NA | NA | NA |
| <b>Andean South America</b> | Peru | Ancash   | Pallasca                  | NA | NA | NA |
| <b>Andean South America</b> | Peru | Ancash   | Pomabamba                 | NA | NA | NA |
| <b>Andean South America</b> | Peru | Ancash   | Recuay                    | NA | NA | NA |
| <b>Andean South America</b> | Peru | Ancash   | Sihuas                    | NA | NA | NA |
| <b>Andean South America</b> | Peru | Ancash   | Yungay                    | NA | NA | NA |
| <b>Andean South America</b> | Peru | Apurímac | NA                        | NA | NA | NA |

|                             |      |          |             |    |    |    |
|-----------------------------|------|----------|-------------|----|----|----|
| <b>Andean South America</b> | Peru | Apurímac | Abancay     | NA | NA | NA |
| <b>Andean South America</b> | Peru | Apurímac | Andahuaylas | NA | NA | NA |
| <b>Andean South America</b> | Peru | Apurímac | Antabamba   | NA | NA | NA |
| <b>Andean South America</b> | Peru | Apurímac | Aymaraes    | NA | NA | NA |
| <b>Andean South America</b> | Peru | Apurímac | Chincheros  | NA | NA | NA |
| <b>Andean South America</b> | Peru | Apurímac | Cotabambas  | NA | NA | NA |
| <b>Andean South America</b> | Peru | Apurímac | Graú        | NA | NA | NA |
| <b>Andean South America</b> | Peru | Arequipa | NA          | NA | NA | NA |
| <b>Andean South America</b> | Peru | Arequipa | Arequipa    | NA | NA | NA |
| <b>Andean South America</b> | Peru | Arequipa | Camaná      | NA | NA | NA |
| <b>Andean South America</b> | Peru | Arequipa | Caravelí    | NA | NA | NA |
| <b>Andean South America</b> | Peru | Arequipa | Castilla    | NA | NA | NA |
| <b>Andean South America</b> | Peru | Arequipa | Caylloma    | NA | NA | NA |
| <b>Andean South America</b> | Peru | Arequipa | Condesuyos  | NA | NA | NA |
| <b>Andean South America</b> | Peru | Arequipa | Islay       | NA | NA | NA |

|                             |      |           |                      |    |    |    |
|-----------------------------|------|-----------|----------------------|----|----|----|
| <b>Andean South America</b> | Peru | Arequipa  | La Unión             | NA | NA | NA |
| <b>Andean South America</b> | Peru | Ayacucho  | NA                   | NA | NA | NA |
| <b>Andean South America</b> | Peru | Ayacucho  | Cangallo             | NA | NA | NA |
| <b>Andean South America</b> | Peru | Ayacucho  | Huamanga             | NA | NA | NA |
| <b>Andean South America</b> | Peru | Ayacucho  | Huanca Sancos        | NA | NA | NA |
| <b>Andean South America</b> | Peru | Ayacucho  | Huanta               | NA | NA | NA |
| <b>Andean South America</b> | Peru | Ayacucho  | La Mar               | NA | NA | NA |
| <b>Andean South America</b> | Peru | Ayacucho  | Lucanas              | NA | NA | NA |
| <b>Andean South America</b> | Peru | Ayacucho  | Parinacochas         | NA | NA | NA |
| <b>Andean South America</b> | Peru | Ayacucho  | Paucar del Sara Sara | NA | NA | NA |
| <b>Andean South America</b> | Peru | Ayacucho  | Sucre                | NA | NA | NA |
| <b>Andean South America</b> | Peru | Ayacucho  | Victor Fajardo       | NA | NA | NA |
| <b>Andean South America</b> | Peru | Ayacucho  | Vilcas Huamán        | NA | NA | NA |
| <b>Andean South America</b> | Peru | Cajamarca | NA                   | NA | NA | NA |
| <b>Andean South America</b> | Peru | Cajamarca | Cajabamba            | NA | NA | NA |

|                             |      |           |             |    |    |    |
|-----------------------------|------|-----------|-------------|----|----|----|
| <b>Andean South America</b> | Peru | Cajamarca | Cajamarca   | NA | NA | NA |
| <b>Andean South America</b> | Peru | Cajamarca | Celendín    | NA | NA | NA |
| <b>Andean South America</b> | Peru | Cajamarca | Chota       | NA | NA | NA |
| <b>Andean South America</b> | Peru | Cajamarca | Contumazá   | NA | NA | NA |
| <b>Andean South America</b> | Peru | Cajamarca | Cutervo     | NA | NA | NA |
| <b>Andean South America</b> | Peru | Cajamarca | Hualgayoc   | NA | NA | NA |
| <b>Andean South America</b> | Peru | Cajamarca | Jaén        | NA | NA | NA |
| <b>Andean South America</b> | Peru | Cajamarca | San Ignacio | NA | NA | NA |
| <b>Andean South America</b> | Peru | Cajamarca | San Marcos  | NA | NA | NA |
| <b>Andean South America</b> | Peru | Cajamarca | San Miguel  | NA | NA | NA |
| <b>Andean South America</b> | Peru | Cajamarca | San Pablo   | NA | NA | NA |
| <b>Andean South America</b> | Peru | Cajamarca | Santa Cruz  | NA | NA | NA |
| <b>Andean South America</b> | Peru | Cusco     | NA          | NA | NA | NA |
| <b>Andean South America</b> | Peru | Cusco     | Acomayo     | NA | NA | NA |
| <b>Andean South America</b> | Peru | Cusco     | Anta        | NA | NA | NA |

|                             |      |              |                |    |    |    |
|-----------------------------|------|--------------|----------------|----|----|----|
| <b>Andean South America</b> | Peru | Cusco        | Calca          | NA | NA | NA |
| <b>Andean South America</b> | Peru | Cusco        | Canas          | NA | NA | NA |
| <b>Andean South America</b> | Peru | Cusco        | Canchis        | NA | NA | NA |
| <b>Andean South America</b> | Peru | Cusco        | Chumbivilcas   | NA | NA | NA |
| <b>Andean South America</b> | Peru | Cusco        | Cusco          | NA | NA | NA |
| <b>Andean South America</b> | Peru | Cusco        | Espinar        | NA | NA | NA |
| <b>Andean South America</b> | Peru | Cusco        | La Convención  | NA | NA | NA |
| <b>Andean South America</b> | Peru | Cusco        | Paruro         | NA | NA | NA |
| <b>Andean South America</b> | Peru | Cusco        | Paucartambo    | NA | NA | NA |
| <b>Andean South America</b> | Peru | Cusco        | Quispicanchi   | NA | NA | NA |
| <b>Andean South America</b> | Peru | Cusco        | Urubamba       | NA | NA | NA |
| <b>Andean South America</b> | Peru | Huancavelica | NA             | NA | NA | NA |
| <b>Andean South America</b> | Peru | Huancavelica | Acobamba       | NA | NA | NA |
| <b>Andean South America</b> | Peru | Huancavelica | Angaraes       | NA | NA | NA |
| <b>Andean South America</b> | Peru | Huancavelica | Castrovirreyna | NA | NA | NA |

|                             |      |              |              |    |    |    |
|-----------------------------|------|--------------|--------------|----|----|----|
| <b>Andean South America</b> | Peru | Huancavelica | Churcampa    | NA | NA | NA |
| <b>Andean South America</b> | Peru | Huancavelica | Huancavelica | NA | NA | NA |
| <b>Andean South America</b> | Peru | Huancavelica | Huaytara     | NA | NA | NA |
| <b>Andean South America</b> | Peru | Huancavelica | Tayacaja     | NA | NA | NA |
| <b>Andean South America</b> | Peru | Huánuco      | NA           | NA | NA | NA |
| <b>Andean South America</b> | Peru | Huánuco      | Ambo         | NA | NA | NA |
| <b>Andean South America</b> | Peru | Huánuco      | Dos de Mayo  | NA | NA | NA |
| <b>Andean South America</b> | Peru | Huánuco      | Huacaybamba  | NA | NA | NA |
| <b>Andean South America</b> | Peru | Huánuco      | Huamalíes    | NA | NA | NA |
| <b>Andean South America</b> | Peru | Huánuco      | Huenuco      | NA | NA | NA |
| <b>Andean South America</b> | Peru | Huánuco      | Lauricocha   | NA | NA | NA |
| <b>Andean South America</b> | Peru | Huánuco      | Marañón      | NA | NA | NA |
| <b>Andean South America</b> | Peru | Huánuco      | Pachitea     | NA | NA | NA |
| <b>Andean South America</b> | Peru | Huánuco      | Yarowilca    | NA | NA | NA |
| <b>Andean South America</b> | Peru | Ica          | Ica          | NA | NA | NA |

|                             |      |             |            |    |    |    |
|-----------------------------|------|-------------|------------|----|----|----|
| <b>Andean South America</b> | Peru | Ica         | Nazca      | NA | NA | NA |
| <b>Andean South America</b> | Peru | Junín       | NA         | NA | NA | NA |
| <b>Andean South America</b> | Peru | Junín       | Chupaca    | NA | NA | NA |
| <b>Andean South America</b> | Peru | Junín       | Concepción | NA | NA | NA |
| <b>Andean South America</b> | Peru | Junín       | Huancayo   | NA | NA | NA |
| <b>Andean South America</b> | Peru | Junín       | Jauja      | NA | NA | NA |
| <b>Andean South America</b> | Peru | Junín       | Junín      | NA | NA | NA |
| <b>Andean South America</b> | Peru | Junín       | Satipo     | NA | NA | NA |
| <b>Andean South America</b> | Peru | Junín       | Tarma      | NA | NA | NA |
| <b>Andean South America</b> | Peru | Junín       | Yauli      | NA | NA | NA |
| <b>Andean South America</b> | Peru | La Libertad | Bolívar    | NA | NA | NA |
| <b>Andean South America</b> | Peru | La Libertad | Gran Chimú | NA | NA | NA |
| <b>Andean South America</b> | Peru | La Libertad | Julcan     | NA | NA | NA |
| <b>Andean South America</b> | Peru | La Libertad | Otuzco     | NA | NA | NA |
| <b>Andean South America</b> | Peru | La Libertad | Pataz      | NA | NA | NA |

|                             |      |               |                       |    |    |    |
|-----------------------------|------|---------------|-----------------------|----|----|----|
| <b>Andean South America</b> | Peru | La Libertad   | Santiago de Chuco     | NA | NA | NA |
| <b>Andean South America</b> | Peru | La Libertad   | Sánchez Carrión       | NA | NA | NA |
| <b>Andean South America</b> | Peru | Lima          | Cajatambo             | NA | NA | NA |
| <b>Andean South America</b> | Peru | Lima          | Canta                 | NA | NA | NA |
| <b>Andean South America</b> | Peru | Lima          | Huarochoiri           | NA | NA | NA |
| <b>Andean South America</b> | Peru | Lima          | Oyon                  | NA | NA | NA |
| <b>Andean South America</b> | Peru | Lima          | Yauyos                | NA | NA | NA |
| <b>Andean South America</b> | Peru | Madre de Dios | NA                    | NA | NA | NA |
| <b>Andean South America</b> | Peru | Madre de Dios | Manu                  | NA | NA | NA |
| <b>Andean South America</b> | Peru | Madre de Dios | Tahuamanu             | NA | NA | NA |
| <b>Andean South America</b> | Peru | Madre de Dios | Tambopata             | NA | NA | NA |
| <b>Andean South America</b> | Peru | Moquegua      | NA                    | NA | NA | NA |
| <b>Andean South America</b> | Peru | Moquegua      | General Sánchez Cerro | NA | NA | NA |
| <b>Andean South America</b> | Peru | Moquegua      | Mariscal Nieto        | NA | NA | NA |
| <b>Andean South America</b> | Peru | Pasco         | NA                    | NA | NA | NA |



|                             |      |       |                        |    |    |    |
|-----------------------------|------|-------|------------------------|----|----|----|
| <b>Andean South America</b> | Peru | Pasco | Daniel Alcides Carrión | NA | NA | NA |
| <b>Andean South America</b> | Peru | Pasco | Pasco                  | NA | NA | NA |
| <b>Andean South America</b> | Peru | Piura | Ayabaca                | NA | NA | NA |
| <b>Andean South America</b> | Peru | Piura | Huancabamba            | NA | NA | NA |
| <b>Andean South America</b> | Peru | Puno  | NA                     | NA | NA | NA |
| <b>Andean South America</b> | Peru | Puno  | Azángaro               | NA | NA | NA |
| <b>Andean South America</b> | Peru | Puno  | Carabaya               | NA | NA | NA |
| <b>Andean South America</b> | Peru | Puno  | Chucuító               | NA | NA | NA |
| <b>Andean South America</b> | Peru | Puno  | El Collao              | NA | NA | NA |
| <b>Andean South America</b> | Peru | Puno  | Huancane               | NA | NA | NA |
| <b>Andean South America</b> | Peru | Puno  | Lago Titicaca          | NA | NA | NA |
| <b>Andean South America</b> | Peru | Puno  | Lampa                  | NA | NA | NA |
| <b>Andean South America</b> | Peru | Puno  | Melgar                 | NA | NA | NA |
| <b>Andean South America</b> | Peru | Puno  | Moho                   | NA | NA | NA |
| <b>Andean South America</b> | Peru | Puno  | Puno                   | NA | NA | NA |

|                             |           |          |                       |    |    |    |
|-----------------------------|-----------|----------|-----------------------|----|----|----|
| <b>Andean South America</b> | Peru      | Puno     | San Antonio de Putina | NA | NA | NA |
| <b>Andean South America</b> | Peru      | Puno     | San Román             | NA | NA | NA |
| <b>Andean South America</b> | Peru      | Puno     | Sandia                | NA | NA | NA |
| <b>Andean South America</b> | Peru      | Puno     | Yunguyo               | NA | NA | NA |
| <b>Andean South America</b> | Peru      | Tacna    | NA                    | NA | NA | NA |
| <b>Andean South America</b> | Peru      | Tacna    | Candarave             | NA | NA | NA |
| <b>Andean South America</b> | Peru      | Tacna    | Jorge Basadre         | NA | NA | NA |
| <b>Andean South America</b> | Peru      | Tacna    | Tacna                 | NA | NA | NA |
| <b>Andean South America</b> | Peru      | Tacna    | Tarata                | NA | NA | NA |
| <b>Andean South America</b> | Venezuela | Carabobo | Juan José Mora        | NA | NA | NA |
| <b>Andean South America</b> | Venezuela | Carabobo | Libertador            | NA | NA | NA |
| <b>Andean South America</b> | Venezuela | Cojedes  | NA                    | NA | NA | NA |
| <b>Andean South America</b> | Venezuela | Cojedes  | Ezequiel Zomora       | NA | NA | NA |
| <b>Andean South America</b> | Venezuela | Cojedes  | Falcón                | NA | NA | NA |
| <b>Andean South America</b> | Venezuela | Cojedes  | Romulo Gallegos       | NA | NA | NA |

|                                      |             |            |               |             |            |            |
|--------------------------------------|-------------|------------|---------------|-------------|------------|------------|
| <b>Andean South America</b>          | Venezuela   | Cojedes    | Tinaco        | NA          | NA         | NA         |
| <b>Andean South America</b>          | Venezuela   | Falcón     | Palma Sola    | NA          | NA         | NA         |
| <b>Andean South America</b>          | Venezuela   | Lara       | Crespo        | NA          | NA         | NA         |
| <b>Andean South America</b>          | Venezuela   | Yaracuy    | NA            | NA          | NA         | NA         |
| <b>Andean South America</b>          | Venezuela   | Yaracuy    | Bruzual       | NA          | NA         | NA         |
| <b>Andean South America</b>          | Venezuela   | Yaracuy    | Independencia | NA          | NA         | NA         |
| <b>Andean South America</b>          | Venezuela   | Yaracuy    | Manuel Monge  | NA          | NA         | NA         |
| <b>Andean South America</b>          | Venezuela   | Yaracuy    | Nirgua        | NA          | NA         | NA         |
| <b>Andean South America</b>          | Venezuela   | Yaracuy    | Peña          | NA          | NA         | NA         |
| <b>Andean South America</b>          | Venezuela   | Yaracuy    | San Felipe    | NA          | NA         | NA         |
| <b>Andean South America</b>          | Venezuela   | Yaracuy    | Veroes        | NA          | NA         | NA         |
| <b>Central America and Caribbean</b> | El Salvador | NA         | NA            | El Salvador | Ahuachapán | NA         |
| <b>Central America and Caribbean</b> | El Salvador | Ahuachapán | NA            | El Salvador | Ahuachapán | Ahuachapán |
| <b>Central America and Caribbean</b> | El Salvador | Ahuachapán | Ahuachapán    | El Salvador | Ahuachapán | Apaneca    |
| <b>Central America and Caribbean</b> | El Salvador | Ahuachapán | Apaneca       | El Salvador | Ahuachapán | Atiquizaya |

|                                      |             |              |                        |             |             |                        |
|--------------------------------------|-------------|--------------|------------------------|-------------|-------------|------------------------|
| <b>Central America and Caribbean</b> | El Salvador | Ahuachapán   | Atiquizaya             | El Salvador | Ahuachapán  | Concepción de Ataco    |
| <b>Central America and Caribbean</b> | El Salvador | Ahuachapán   | Concepción de Ataco    | El Salvador | Ahuachapán  | El Refugio             |
| <b>Central America and Caribbean</b> | El Salvador | Ahuachapán   | El Refugio             | El Salvador | Ahuachapán  | Guaymango              |
| <b>Central America and Caribbean</b> | El Salvador | Ahuachapán   | Guaymango              | El Salvador | Ahuachapán  | Jujutla                |
| <b>Central America and Caribbean</b> | El Salvador | Ahuachapán   | Jujutla                | El Salvador | Ahuachapán  | San Francisco Menéndez |
| <b>Central America and Caribbean</b> | El Salvador | Ahuachapán   | San Francisco Menéndez | El Salvador | Ahuachapán  | San Lorenzo            |
| <b>Central America and Caribbean</b> | El Salvador | Ahuachapán   | San Lorenzo            | El Salvador | Ahuachapán  | San Pedro Puxtla       |
| <b>Central America and Caribbean</b> | El Salvador | Ahuachapán   | San Pedro Puxtla       | El Salvador | Ahuachapán  | Tacuba                 |
| <b>Central America and Caribbean</b> | El Salvador | Ahuachapán   | Tacuba                 | El Salvador | Ahuachapán  | Turín                  |
| <b>Central America and Caribbean</b> | El Salvador | Ahuachapán   | Turín                  | El Salvador | La Libertad | NA                     |
| <b>Central America and Caribbean</b> | El Salvador | Cabañas      | Cinquera               | El Salvador | La Libertad | Ciudad Arce            |
| <b>Central America and Caribbean</b> | El Salvador | Cabañas      | Tejutepeque            | El Salvador | La Libertad | Colón                  |
| <b>Central America and Caribbean</b> | El Salvador | Chalatenango | NA                     | El Salvador | La Libertad | Jayaque                |
| <b>Central America and Caribbean</b> | El Salvador | Chalatenango | Agua Caliente          | El Salvador | La Libertad | Jicalapa               |
| <b>Central America and Caribbean</b> | El Salvador | Chalatenango | Dulce Nombre de María  | El Salvador | La Libertad | Sacacoyo               |

|                                      |             |              |                         |             |             |                           |
|--------------------------------------|-------------|--------------|-------------------------|-------------|-------------|---------------------------|
| <b>Central America and Caribbean</b> | El Salvador | Chalatenango | Embalse Cerron Grande   | El Salvador | La Libertad | San Pablo Tacachico       |
| <b>Central America and Caribbean</b> | El Salvador | Chalatenango | La Palma                | El Salvador | La Libertad | Teotepeque                |
| <b>Central America and Caribbean</b> | El Salvador | Chalatenango | La Reina                | El Salvador | La Libertad | Tepecoyo                  |
| <b>Central America and Caribbean</b> | El Salvador | Chalatenango | Nueva Concepción        | El Salvador | Santa Ana   | NA                        |
| <b>Central America and Caribbean</b> | El Salvador | Chalatenango | San Francisco Morazán   | El Salvador | Santa Ana   | Candelaria de la Frontera |
| <b>Central America and Caribbean</b> | El Salvador | Chalatenango | San Luis del Carmen     | El Salvador | Santa Ana   | Chalchuapa                |
| <b>Central America and Caribbean</b> | El Salvador | Chalatenango | San Rafael              | El Salvador | Santa Ana   | Coatepeque                |
| <b>Central America and Caribbean</b> | El Salvador | Chalatenango | Tejutla                 | El Salvador | Santa Ana   | El Congo                  |
| <b>Central America and Caribbean</b> | El Salvador | Cuscatlán    | NA                      | El Salvador | Santa Ana   | El Porvenir               |
| <b>Central America and Caribbean</b> | El Salvador | Cuscatlán    | Oratorio de Concepción  | El Salvador | Santa Ana   | Lago de Coatepeque        |
| <b>Central America and Caribbean</b> | El Salvador | Cuscatlán    | San Bartolomé Perulapía | El Salvador | Santa Ana   | Lago de Guija             |
| <b>Central America and Caribbean</b> | El Salvador | Cuscatlán    | San José Guayabal       | El Salvador | Santa Ana   | Masahuat                  |
| <b>Central America and Caribbean</b> | El Salvador | Cuscatlán    | Suchitoto               | El Salvador | Santa Ana   | Metapán                   |
| <b>Central America and Caribbean</b> | El Salvador | Cuscatlán    | Tenancingo              | El Salvador | Santa Ana   | San Antonio Pajonal       |
| <b>Central America and Caribbean</b> | El Salvador | La Libertad  | NA                      | El Salvador | Santa Ana   | San Sebastián Salitrillo  |

|                                      |             |             |                     |             |           |                         |
|--------------------------------------|-------------|-------------|---------------------|-------------|-----------|-------------------------|
| <b>Central America and Caribbean</b> | El Salvador | La Libertad | Antiguo Cuscatlán   | El Salvador | Santa Ana | Santa Ana               |
| <b>Central America and Caribbean</b> | El Salvador | La Libertad | Chiltiupán          | El Salvador | Santa Ana | Santiago de la Frontera |
| <b>Central America and Caribbean</b> | El Salvador | La Libertad | Ciudad Arce         | El Salvador | Santa Ana | Texistepeque            |
| <b>Central America and Caribbean</b> | El Salvador | La Libertad | Colón               | El Salvador | Sonsonate | NA                      |
| <b>Central America and Caribbean</b> | El Salvador | La Libertad | Comasagua           | El Salvador | Sonsonate | Acajutla                |
| <b>Central America and Caribbean</b> | El Salvador | La Libertad | Huizúcar            | El Salvador | Sonsonate | Armenia                 |
| <b>Central America and Caribbean</b> | El Salvador | La Libertad | Jayaque             | El Salvador | Sonsonate | Caluco                  |
| <b>Central America and Caribbean</b> | El Salvador | La Libertad | Jicalapa            | El Salvador | Sonsonate | Cuisnahuat              |
| <b>Central America and Caribbean</b> | El Salvador | La Libertad | Nueva San Salvador  | El Salvador | Sonsonate | Izalco                  |
| <b>Central America and Caribbean</b> | El Salvador | La Libertad | Opico               | El Salvador | Sonsonate | Juayúa                  |
| <b>Central America and Caribbean</b> | El Salvador | La Libertad | Quezaltepeque       | El Salvador | Sonsonate | Nahuizalco              |
| <b>Central America and Caribbean</b> | El Salvador | La Libertad | Sacacoyo            | El Salvador | Sonsonate | Nahulingo               |
| <b>Central America and Caribbean</b> | El Salvador | La Libertad | San José Villanueva | El Salvador | Sonsonate | Salcoatitán             |
| <b>Central America and Caribbean</b> | El Salvador | La Libertad | San Matías          | El Salvador | Sonsonate | San Antonio del Monte   |
| <b>Central America and Caribbean</b> | El Salvador | La Libertad | San Pablo Tacachico | El Salvador | Sonsonate | San Julián              |

|                                      |             |              |               |             |              |                         |
|--------------------------------------|-------------|--------------|---------------|-------------|--------------|-------------------------|
| <b>Central America and Caribbean</b> | El Salvador | La Libertad  | Talnique      | El Salvador | Sonsonate    | Santa Catarina Masahuat |
| <b>Central America and Caribbean</b> | El Salvador | La Libertad  | Tamanique     | El Salvador | Sonsonate    | Santa Isabel Ishuatán   |
| <b>Central America and Caribbean</b> | El Salvador | La Libertad  | Teotepeque    | El Salvador | Sonsonate    | Santo Domingo           |
| <b>Central America and Caribbean</b> | El Salvador | La Libertad  | Tepecoyo      | El Salvador | Sonsonate    | Sonsonate               |
| <b>Central America and Caribbean</b> | El Salvador | La Libertad  | Zaragoza      | El Salvador | Sonsonate    | Sonzacate               |
| <b>Central America and Caribbean</b> | El Salvador | La Paz       | Olocuilta     | Guatemala   | Alta Verapaz | Cobán                   |
| <b>Central America and Caribbean</b> | El Salvador | San Salvador | NA            | Guatemala   | Alta Verapaz | San Cristóbal Verapaz   |
| <b>Central America and Caribbean</b> | El Salvador | San Salvador | Aguilares     | Guatemala   | Alta Verapaz | San Juan Chamelco       |
| <b>Central America and Caribbean</b> | El Salvador | San Salvador | Apopa         | Guatemala   | Alta Verapaz | Santa Cruz Verapaz      |
| <b>Central America and Caribbean</b> | El Salvador | San Salvador | Ayutuxtepeque | Guatemala   | Alta Verapaz | Tactic                  |
| <b>Central America and Caribbean</b> | El Salvador | San Salvador | Cuscatancingo | Guatemala   | Baja Verapaz | NA                      |
| <b>Central America and Caribbean</b> | El Salvador | San Salvador | Delgado       | Guatemala   | Baja Verapaz | Cubulco                 |
| <b>Central America and Caribbean</b> | El Salvador | San Salvador | El Paisnal    | Guatemala   | Baja Verapaz | Granados                |
| <b>Central America and Caribbean</b> | El Salvador | San Salvador | Guazapa       | Guatemala   | Baja Verapaz | Rabinal                 |
| <b>Central America and Caribbean</b> | El Salvador | San Salvador | Ilopango      | Guatemala   | Baja Verapaz | San Miguel Chicaj       |

|                                      |             |              |                           |           |               |                        |
|--------------------------------------|-------------|--------------|---------------------------|-----------|---------------|------------------------|
| <b>Central America and Caribbean</b> | El Salvador | San Salvador | Mejicanos                 | Guatemala | Baja Verapaz  | Santa Cruz El Chol     |
| <b>Central America and Caribbean</b> | El Salvador | San Salvador | Nejapa                    | Guatemala | Chimaltenango | NA                     |
| <b>Central America and Caribbean</b> | El Salvador | San Salvador | Panchimalco               | Guatemala | Chimaltenango | Acatenango             |
| <b>Central America and Caribbean</b> | El Salvador | San Salvador | Rosario de Mora           | Guatemala | Chimaltenango | Chimaltenango          |
| <b>Central America and Caribbean</b> | El Salvador | San Salvador | San Marcos                | Guatemala | Chimaltenango | Comalapa               |
| <b>Central America and Caribbean</b> | El Salvador | San Salvador | San Martín                | Guatemala | Chimaltenango | El Tejar               |
| <b>Central America and Caribbean</b> | El Salvador | San Salvador | San Salvador              | Guatemala | Chimaltenango | Parramos               |
| <b>Central America and Caribbean</b> | El Salvador | San Salvador | Soyapango                 | Guatemala | Chimaltenango | Patzicía               |
| <b>Central America and Caribbean</b> | El Salvador | San Salvador | Tonacatepeque             | Guatemala | Chimaltenango | Patzún                 |
| <b>Central America and Caribbean</b> | El Salvador | Santa Ana    | NA                        | Guatemala | Chimaltenango | Pochuta                |
| <b>Central America and Caribbean</b> | El Salvador | Santa Ana    | Candelaria de la Frontera | Guatemala | Chimaltenango | San Andrés Itzapa      |
| <b>Central America and Caribbean</b> | El Salvador | Santa Ana    | Chalchuapa                | Guatemala | Chimaltenango | San José Poaquil       |
| <b>Central America and Caribbean</b> | El Salvador | Santa Ana    | Coatepeque                | Guatemala | Chimaltenango | San Martín Jilotepeque |
| <b>Central America and Caribbean</b> | El Salvador | Santa Ana    | El Congo                  | Guatemala | Chimaltenango | Santa Apolonia         |
| <b>Central America and Caribbean</b> | El Salvador | Santa Ana    | El Porvenir               | Guatemala | Chimaltenango | Santa Cruz Balanyá     |



|                                      |             |           |                          |           |               |                    |
|--------------------------------------|-------------|-----------|--------------------------|-----------|---------------|--------------------|
| <b>Central America and Caribbean</b> | El Salvador | Santa Ana | Lago de Coatepeque       | Guatemala | Chimaltenango | Tecpán Guatemala   |
| <b>Central America and Caribbean</b> | El Salvador | Santa Ana | Lago de Guija            | Guatemala | Chimaltenango | Yepocapa           |
| <b>Central America and Caribbean</b> | El Salvador | Santa Ana | Masahuat                 | Guatemala | Chimaltenango | Zaragoza           |
| <b>Central America and Caribbean</b> | El Salvador | Santa Ana | Metapán                  | Guatemala | Escuintla     | Escuintla          |
| <b>Central America and Caribbean</b> | El Salvador | Santa Ana | San Antonio Pajonal      | Guatemala | Escuintla     | Palín              |
| <b>Central America and Caribbean</b> | El Salvador | Santa Ana | San Sebastián Salitrillo | Guatemala | Escuintla     | San Vicente Pacaya |
| <b>Central America and Caribbean</b> | El Salvador | Santa Ana | Santa Ana                | Guatemala | Guatemala     | NA                 |
| <b>Central America and Caribbean</b> | El Salvador | Santa Ana | Santa Rosa Guachipilín   | Guatemala | Guatemala     | Amatitlán          |
| <b>Central America and Caribbean</b> | El Salvador | Santa Ana | Santiago de la Frontera  | Guatemala | Guatemala     | Chinautla          |
| <b>Central America and Caribbean</b> | El Salvador | Santa Ana | Texistepeque             | Guatemala | Guatemala     | Chuarrancho        |
| <b>Central America and Caribbean</b> | El Salvador | Sonsonate | NA                       | Guatemala | Guatemala     | Fraijanes          |
| <b>Central America and Caribbean</b> | El Salvador | Sonsonate | Acajutla                 | Guatemala | Guatemala     | Mixco              |
| <b>Central America and Caribbean</b> | El Salvador | Sonsonate | Armenia                  | Guatemala | Guatemala     | Palencia           |
| <b>Central America and Caribbean</b> | El Salvador | Sonsonate | Caluco                   | Guatemala | Guatemala     | Petapa             |
| <b>Central America and Caribbean</b> | El Salvador | Sonsonate | Cuisnahuat               | Guatemala | Guatemala     | San José Pinula    |

|                                      |             |              |                         |           |           |                        |
|--------------------------------------|-------------|--------------|-------------------------|-----------|-----------|------------------------|
| <b>Central America and Caribbean</b> | El Salvador | Sonsonate    | Izalco                  | Guatemala | Guatemala | San José del Golfo     |
| <b>Central America and Caribbean</b> | El Salvador | Sonsonate    | Juayúa                  | Guatemala | Guatemala | San Juan Sacatepéquez  |
| <b>Central America and Caribbean</b> | El Salvador | Sonsonate    | Nahuizalco              | Guatemala | Guatemala | San Pedro Ayampuc      |
| <b>Central America and Caribbean</b> | El Salvador | Sonsonate    | Nahulingo               | Guatemala | Guatemala | San Pedro Sacatepéquez |
| <b>Central America and Caribbean</b> | El Salvador | Sonsonate    | Salcoatitán             | Guatemala | Guatemala | San Raymundo           |
| <b>Central America and Caribbean</b> | El Salvador | Sonsonate    | San Antonio del Monte   | Guatemala | Guatemala | Santa Catarina Pinula  |
| <b>Central America and Caribbean</b> | El Salvador | Sonsonate    | San Julián              | Guatemala | Guatemala | Villa Canales          |
| <b>Central America and Caribbean</b> | El Salvador | Sonsonate    | Santa Catarina Masahuat | Guatemala | Guatemala | Villa Nueva            |
| <b>Central America and Caribbean</b> | El Salvador | Sonsonate    | Santa Isabel Ishuatán   | Guatemala | Guatemala | ZONA 1                 |
| <b>Central America and Caribbean</b> | El Salvador | Sonsonate    | Santo Domingo           | Guatemala | Guatemala | ZONA 10                |
| <b>Central America and Caribbean</b> | El Salvador | Sonsonate    | Sonsonate               | Guatemala | Guatemala | ZONA 11                |
| <b>Central America and Caribbean</b> | El Salvador | Sonsonate    | Sonzacate               | Guatemala | Guatemala | ZONA 12                |
| <b>Central America and Caribbean</b> | Guatemala   | Alta Verapaz | Cobán                   | Guatemala | Guatemala | ZONA 13                |
| <b>Central America and Caribbean</b> | Guatemala   | Alta Verapaz | San Cristóbal Verapaz   | Guatemala | Guatemala | ZONA 14                |
| <b>Central America and Caribbean</b> | Guatemala   | Alta Verapaz | San Juan Chamelco       | Guatemala | Guatemala | ZONA 15                |

|                                      |           |               |                    |           |           |         |
|--------------------------------------|-----------|---------------|--------------------|-----------|-----------|---------|
| <b>Central America and Caribbean</b> | Guatemala | Alta Verapaz  | Santa Cruz Verapaz | Guatemala | Guatemala | ZONA 16 |
| <b>Central America and Caribbean</b> | Guatemala | Alta Verapaz  | Tactic             | Guatemala | Guatemala | ZONA 17 |
| <b>Central America and Caribbean</b> | Guatemala | Baja Verapaz  | NA                 | Guatemala | Guatemala | ZONA 18 |
| <b>Central America and Caribbean</b> | Guatemala | Baja Verapaz  | Cubulco            | Guatemala | Guatemala | ZONA 19 |
| <b>Central America and Caribbean</b> | Guatemala | Baja Verapaz  | Granados           | Guatemala | Guatemala | ZONA 2  |
| <b>Central America and Caribbean</b> | Guatemala | Baja Verapaz  | Rabinal            | Guatemala | Guatemala | ZONA 22 |
| <b>Central America and Caribbean</b> | Guatemala | Baja Verapaz  | San Miguel Chicaj  | Guatemala | Guatemala | ZONA 24 |
| <b>Central America and Caribbean</b> | Guatemala | Baja Verapaz  | Santa Cruz El Chol | Guatemala | Guatemala | ZONA 25 |
| <b>Central America and Caribbean</b> | Guatemala | Chimaltenango | NA                 | Guatemala | Guatemala | ZONA 3  |
| <b>Central America and Caribbean</b> | Guatemala | Chimaltenango | Acatenango         | Guatemala | Guatemala | ZONA 4  |
| <b>Central America and Caribbean</b> | Guatemala | Chimaltenango | Chimaltenango      | Guatemala | Guatemala | ZONA 5  |
| <b>Central America and Caribbean</b> | Guatemala | Chimaltenango | Comalapa           | Guatemala | Guatemala | ZONA 6  |
| <b>Central America and Caribbean</b> | Guatemala | Chimaltenango | El Tejar           | Guatemala | Guatemala | ZONA 7  |
| <b>Central America and Caribbean</b> | Guatemala | Chimaltenango | Parramos           | Guatemala | Guatemala | ZONA 8  |
| <b>Central America and Caribbean</b> | Guatemala | Chimaltenango | Patzicía           | Guatemala | Guatemala | ZONA 9  |

|                                      |           |               |                        |           |               |                          |
|--------------------------------------|-----------|---------------|------------------------|-----------|---------------|--------------------------|
| <b>Central America and Caribbean</b> | Guatemala | Chimaltenango | Patzún                 | Guatemala | Huehuetenango | NA                       |
| <b>Central America and Caribbean</b> | Guatemala | Chimaltenango | San Andrés Itzapa      | Guatemala | Huehuetenango | Aguacatán                |
| <b>Central America and Caribbean</b> | Guatemala | Chimaltenango | San José Poaquil       | Guatemala | Huehuetenango | Chiantla                 |
| <b>Central America and Caribbean</b> | Guatemala | Chimaltenango | San Martín Jilotepeque | Guatemala | Huehuetenango | Colotenango              |
| <b>Central America and Caribbean</b> | Guatemala | Chimaltenango | Santa Apolonia         | Guatemala | Huehuetenango | Concepción Huista        |
| <b>Central America and Caribbean</b> | Guatemala | Chimaltenango | Santa Cruz Balanyá     | Guatemala | Huehuetenango | Cuilco                   |
| <b>Central America and Caribbean</b> | Guatemala | Chimaltenango | Tecpán Guatemala       | Guatemala | Huehuetenango | Huehuetenango            |
| <b>Central America and Caribbean</b> | Guatemala | Chimaltenango | Zaragoza               | Guatemala | Huehuetenango | Jacaltenango             |
| <b>Central America and Caribbean</b> | Guatemala | El Progreso   | San Antonio La Paz     | Guatemala | Huehuetenango | La Democracia            |
| <b>Central America and Caribbean</b> | Guatemala | Guatemala     | NA                     | Guatemala | Huehuetenango | La Libertad              |
| <b>Central America and Caribbean</b> | Guatemala | Guatemala     | Amatitlán              | Guatemala | Huehuetenango | Malacatancito            |
| <b>Central America and Caribbean</b> | Guatemala | Guatemala     | Chinautla              | Guatemala | Huehuetenango | San Antonio Huista       |
| <b>Central America and Caribbean</b> | Guatemala | Guatemala     | Churranchó             | Guatemala | Huehuetenango | San Gaspar Ixchil        |
| <b>Central America and Caribbean</b> | Guatemala | Guatemala     | Fraijanes              | Guatemala | Huehuetenango | San Ildefonso Ixtahuacán |
| <b>Central America and Caribbean</b> | Guatemala | Guatemala     | Mixco                  | Guatemala | Huehuetenango | San Juan Atitán          |

|                                      |           |           |                        |           |               |                             |
|--------------------------------------|-----------|-----------|------------------------|-----------|---------------|-----------------------------|
| <b>Central America and Caribbean</b> | Guatemala | Guatemala | Palencia               | Guatemala | Huehuetenango | San Juan Ixcoy              |
| <b>Central America and Caribbean</b> | Guatemala | Guatemala | Petapa                 | Guatemala | Huehuetenango | San Miguel Acatán           |
| <b>Central America and Caribbean</b> | Guatemala | Guatemala | San José Pinula        | Guatemala | Huehuetenango | San Pedro Necta             |
| <b>Central America and Caribbean</b> | Guatemala | Guatemala | San José del Golfo     | Guatemala | Huehuetenango | San Rafael La Independencia |
| <b>Central America and Caribbean</b> | Guatemala | Guatemala | San Juan Sacatepéquez  | Guatemala | Huehuetenango | San Rafael Petzal           |
| <b>Central America and Caribbean</b> | Guatemala | Guatemala | San Pedro Ayampuc      | Guatemala | Huehuetenango | San Sebastián Coatán        |
| <b>Central America and Caribbean</b> | Guatemala | Guatemala | San Pedro Sacatepéquez | Guatemala | Huehuetenango | San Sebastián Huehuetenango |
| <b>Central America and Caribbean</b> | Guatemala | Guatemala | San Raymundo           | Guatemala | Huehuetenango | Santa Ana Huista            |
| <b>Central America and Caribbean</b> | Guatemala | Guatemala | Santa Catarina Pinula  | Guatemala | Huehuetenango | Santa Bárbara               |
| <b>Central America and Caribbean</b> | Guatemala | Guatemala | Villa Canales          | Guatemala | Huehuetenango | Santa Eulalia               |
| <b>Central America and Caribbean</b> | Guatemala | Guatemala | Villa Nueva            | Guatemala | Huehuetenango | Santiago Chimaltenango      |
| <b>Central America and Caribbean</b> | Guatemala | Guatemala | ZONA 1                 | Guatemala | Huehuetenango | Soloma                      |
| <b>Central America and Caribbean</b> | Guatemala | Guatemala | ZONA 10                | Guatemala | Huehuetenango | Tectitán                    |
| <b>Central America and Caribbean</b> | Guatemala | Guatemala | ZONA 11                | Guatemala | Huehuetenango | Todos Santos Cuchumatán     |
| <b>Central America and Caribbean</b> | Guatemala | Guatemala | ZONA 12                | Guatemala | Quezaltenango | NA                          |

|                                      |           |           |         |           |               |                          |
|--------------------------------------|-----------|-----------|---------|-----------|---------------|--------------------------|
| <b>Central America and Caribbean</b> | Guatemala | Guatemala | ZONA 13 | Guatemala | Quezaltenango | Almolonga                |
| <b>Central America and Caribbean</b> | Guatemala | Guatemala | ZONA 14 | Guatemala | Quezaltenango | Cabricán                 |
| <b>Central America and Caribbean</b> | Guatemala | Guatemala | ZONA 15 | Guatemala | Quezaltenango | Cajolá                   |
| <b>Central America and Caribbean</b> | Guatemala | Guatemala | ZONA 16 | Guatemala | Quezaltenango | Cantel                   |
| <b>Central America and Caribbean</b> | Guatemala | Guatemala | ZONA 17 | Guatemala | Quezaltenango | Concepción Chiquirichapa |
| <b>Central America and Caribbean</b> | Guatemala | Guatemala | ZONA 18 | Guatemala | Quezaltenango | El Palmar                |
| <b>Central America and Caribbean</b> | Guatemala | Guatemala | ZONA 19 | Guatemala | Quezaltenango | Huitán                   |
| <b>Central America and Caribbean</b> | Guatemala | Guatemala | ZONA 2  | Guatemala | Quezaltenango | La Esperanza             |
| <b>Central America and Caribbean</b> | Guatemala | Guatemala | ZONA 22 | Guatemala | Quezaltenango | Olintepeque              |
| <b>Central America and Caribbean</b> | Guatemala | Guatemala | ZONA 24 | Guatemala | Quezaltenango | Ostuncalco               |
| <b>Central America and Caribbean</b> | Guatemala | Guatemala | ZONA 25 | Guatemala | Quezaltenango | Palestina de Los Altos   |
| <b>Central America and Caribbean</b> | Guatemala | Guatemala | ZONA 3  | Guatemala | Quezaltenango | Quetzaltenango           |
| <b>Central America and Caribbean</b> | Guatemala | Guatemala | ZONA 4  | Guatemala | Quezaltenango | Salcajá                  |
| <b>Central America and Caribbean</b> | Guatemala | Guatemala | ZONA 5  | Guatemala | Quezaltenango | San Carlos Sija          |
| <b>Central America and Caribbean</b> | Guatemala | Guatemala | ZONA 6  | Guatemala | Quezaltenango | San Francisco La Unión   |

|                                      |           |               |                   |           |               |                         |
|--------------------------------------|-----------|---------------|-------------------|-----------|---------------|-------------------------|
| <b>Central America and Caribbean</b> | Guatemala | Guatemala     | ZONA 7            | Guatemala | Quezaltenango | San Martín Sacatepéquez |
| <b>Central America and Caribbean</b> | Guatemala | Guatemala     | ZONA 8            | Guatemala | Quezaltenango | San Mateo               |
| <b>Central America and Caribbean</b> | Guatemala | Guatemala     | ZONA 9            | Guatemala | Quezaltenango | San Miguel Sigüilá      |
| <b>Central America and Caribbean</b> | Guatemala | Huehuetenango | NA                | Guatemala | Quezaltenango | Sibilia                 |
| <b>Central America and Caribbean</b> | Guatemala | Huehuetenango | Aguacatán         | Guatemala | Quezaltenango | Zunil                   |
| <b>Central America and Caribbean</b> | Guatemala | Huehuetenango | Chiantla          | Guatemala | Quiché        | NA                      |
| <b>Central America and Caribbean</b> | Guatemala | Huehuetenango | Colotenango       | Guatemala | Quiché        | Canillá                 |
| <b>Central America and Caribbean</b> | Guatemala | Huehuetenango | Concepción Huista | Guatemala | Quiché        | Chajul                  |
| <b>Central America and Caribbean</b> | Guatemala | Huehuetenango | Cuilco            | Guatemala | Quiché        | Chicaman                |
| <b>Central America and Caribbean</b> | Guatemala | Huehuetenango | Huehuetenango     | Guatemala | Quiché        | Chichicastenango        |
| <b>Central America and Caribbean</b> | Guatemala | Huehuetenango | Jacaltenango      | Guatemala | Quiché        | Chiché                  |
| <b>Central America and Caribbean</b> | Guatemala | Huehuetenango | La Democracia     | Guatemala | Quiché        | Chinique                |
| <b>Central America and Caribbean</b> | Guatemala | Huehuetenango | La Libertad       | Guatemala | Quiché        | Cunén                   |
| <b>Central America and Caribbean</b> | Guatemala | Huehuetenango | Malacatancito     | Guatemala | Quiché        | Joyabaj                 |
| <b>Central America and Caribbean</b> | Guatemala | Huehuetenango | Nentón            | Guatemala | Quiché        | Nebaj                   |

|                                      |           |               |                             |           |              |                           |
|--------------------------------------|-----------|---------------|-----------------------------|-----------|--------------|---------------------------|
| <b>Central America and Caribbean</b> | Guatemala | Huehuetenango | San Antonio Huista          | Guatemala | Quiché       | Pachalúm                  |
| <b>Central America and Caribbean</b> | Guatemala | Huehuetenango | San Gaspar Ixchil           | Guatemala | Quiché       | Patzité                   |
| <b>Central America and Caribbean</b> | Guatemala | Huehuetenango | San Ildefonso Ixtahuacán    | Guatemala | Quiché       | Sacapulas                 |
| <b>Central America and Caribbean</b> | Guatemala | Huehuetenango | San Juan Atitán             | Guatemala | Quiché       | San Andrés Sajcabajá      |
| <b>Central America and Caribbean</b> | Guatemala | Huehuetenango | San Juan Ixcoy              | Guatemala | Quiché       | San Antonio Ilootenango   |
| <b>Central America and Caribbean</b> | Guatemala | Huehuetenango | San Mateo Ixtatán           | Guatemala | Quiché       | San Bartolomé Jocotenango |
| <b>Central America and Caribbean</b> | Guatemala | Huehuetenango | San Miguel Acatán           | Guatemala | Quiché       | San Juan Cotzal           |
| <b>Central America and Caribbean</b> | Guatemala | Huehuetenango | San Pedro Necta             | Guatemala | Quiché       | San Pedro Jocopilas       |
| <b>Central America and Caribbean</b> | Guatemala | Huehuetenango | San Rafael La Independencia | Guatemala | Quiché       | Santa Cruz del Quiché     |
| <b>Central America and Caribbean</b> | Guatemala | Huehuetenango | San Rafael Petzal           | Guatemala | Quiché       | Uspantán                  |
| <b>Central America and Caribbean</b> | Guatemala | Huehuetenango | San Sebastián Coatán        | Guatemala | Quiché       | Zacualpa                  |
| <b>Central America and Caribbean</b> | Guatemala | Huehuetenango | San Sebastián Huehuetenango | Guatemala | Sacatepéquez | NA                        |
| <b>Central America and Caribbean</b> | Guatemala | Huehuetenango | Santa Ana Huista            | Guatemala | Sacatepéquez | Antigua Guatemala         |
| <b>Central America and Caribbean</b> | Guatemala | Huehuetenango | Santa Bárbara               | Guatemala | Sacatepéquez | Ciudad Vieja              |
| <b>Central America and Caribbean</b> | Guatemala | Huehuetenango | Santa Cruz Barillas         | Guatemala | Sacatepéquez | Jocotenango               |



|                                      |           |               |                          |           |              |                             |
|--------------------------------------|-----------|---------------|--------------------------|-----------|--------------|-----------------------------|
| <b>Central America and Caribbean</b> | Guatemala | Huehuetenango | Santa Eulalia            | Guatemala | Sacatepéquez | Magdalena Milpas Altas      |
| <b>Central America and Caribbean</b> | Guatemala | Huehuetenango | Santiago Chimaltenango   | Guatemala | Sacatepéquez | Pastores                    |
| <b>Central America and Caribbean</b> | Guatemala | Huehuetenango | Soloma                   | Guatemala | Sacatepéquez | San Antonio Aguas Calientes |
| <b>Central America and Caribbean</b> | Guatemala | Huehuetenango | Tectitán                 | Guatemala | Sacatepéquez | San Bartolomé Milpas Altas  |
| <b>Central America and Caribbean</b> | Guatemala | Huehuetenango | Todos Santos Cuchumatán  | Guatemala | Sacatepéquez | San Lucas Sacatepéquez      |
| <b>Central America and Caribbean</b> | Guatemala | Quezaltenango | NA                       | Guatemala | Sacatepéquez | San Miguel Dueñas           |
| <b>Central America and Caribbean</b> | Guatemala | Quezaltenango | Almolonga                | Guatemala | Sacatepéquez | Santa Lucía Milpas Altas    |
| <b>Central America and Caribbean</b> | Guatemala | Quezaltenango | Cabricán                 | Guatemala | Sacatepéquez | Santa María de Jesús        |
| <b>Central America and Caribbean</b> | Guatemala | Quezaltenango | Cajolá                   | Guatemala | Sacatepéquez | Santiago Sacatepéquez       |
| <b>Central America and Caribbean</b> | Guatemala | Quezaltenango | Cantel                   | Guatemala | Sacatepéquez | Santo Domingo Xenacoj       |
| <b>Central America and Caribbean</b> | Guatemala | Quezaltenango | Concepción Chiquirichapa | Guatemala | Sacatepéquez | Sumpango                    |
| <b>Central America and Caribbean</b> | Guatemala | Quezaltenango | Huitán                   | Guatemala | San Marcos   | NA                          |
| <b>Central America and Caribbean</b> | Guatemala | Quezaltenango | La Esperanza             | Guatemala | San Marcos   | Comitancillo                |
| <b>Central America and Caribbean</b> | Guatemala | Quezaltenango | Olintepeque              | Guatemala | San Marcos   | Concepción Tutuapa          |
| <b>Central America and Caribbean</b> | Guatemala | Quezaltenango | Ostuncalco               | Guatemala | San Marcos   | El Tumbador                 |

|                                      |           |               |                         |           |            |                             |
|--------------------------------------|-----------|---------------|-------------------------|-----------|------------|-----------------------------|
| <b>Central America and Caribbean</b> | Guatemala | Quezaltenango | Palestina de Los Altos  | Guatemala | San Marcos | Esquipulas Palo Gordo       |
| <b>Central America and Caribbean</b> | Guatemala | Quezaltenango | Quetzaltenango          | Guatemala | San Marcos | Ixchiguan                   |
| <b>Central America and Caribbean</b> | Guatemala | Quezaltenango | Salcajá                 | Guatemala | San Marcos | La Reforma                  |
| <b>Central America and Caribbean</b> | Guatemala | Quezaltenango | San Carlos Sija         | Guatemala | San Marcos | Río Blanco                  |
| <b>Central America and Caribbean</b> | Guatemala | Quezaltenango | San Francisco La Unión  | Guatemala | San Marcos | San Antonio Sacatepéquez    |
| <b>Central America and Caribbean</b> | Guatemala | Quezaltenango | San Martín Sacatepéquez | Guatemala | San Marcos | San Cristobal Cucho         |
| <b>Central America and Caribbean</b> | Guatemala | Quezaltenango | San Mateo               | Guatemala | San Marcos | San José Ojetenam           |
| <b>Central America and Caribbean</b> | Guatemala | Quezaltenango | San Miguel Sigüilá      | Guatemala | San Marcos | San Lorenzo                 |
| <b>Central America and Caribbean</b> | Guatemala | Quezaltenango | Sibilia                 | Guatemala | San Marcos | San Marcos                  |
| <b>Central America and Caribbean</b> | Guatemala | Quezaltenango | Zunil                   | Guatemala | San Marcos | San Miguel Ixtahuacán       |
| <b>Central America and Caribbean</b> | Guatemala | Quiché        | NA                      | Guatemala | San Marcos | San Pablo                   |
| <b>Central America and Caribbean</b> | Guatemala | Quiché        | Canillá                 | Guatemala | San Marcos | San Pedro Sacatepéquez      |
| <b>Central America and Caribbean</b> | Guatemala | Quiché        | Chajul                  | Guatemala | San Marcos | San Rafael Pie de la Cuesta |
| <b>Central America and Caribbean</b> | Guatemala | Quiché        | Chicaman                | Guatemala | San Marcos | San Sibinal                 |
| <b>Central America and Caribbean</b> | Guatemala | Quiché        | Chichicastenango        | Guatemala | San Marcos | Sipacapa                    |

|                                      |           |        |                              |           |            |                         |
|--------------------------------------|-----------|--------|------------------------------|-----------|------------|-------------------------|
| <b>Central America and Caribbean</b> | Guatemala | Quiché | Chiché                       | Guatemala | San Marcos | Tacaná                  |
| <b>Central America and Caribbean</b> | Guatemala | Quiché | Chinique                     | Guatemala | San Marcos | Tajumulco               |
| <b>Central America and Caribbean</b> | Guatemala | Quiché | Cunén                        | Guatemala | San Marcos | Tejutla                 |
| <b>Central America and Caribbean</b> | Guatemala | Quiché | Joyabaj                      | Guatemala | Santa Rosa | Nueva Santa Rosa        |
| <b>Central America and Caribbean</b> | Guatemala | Quiché | Nebaj                        | Guatemala | Santa Rosa | Santa Cruz<br>Naranjo   |
| <b>Central America and Caribbean</b> | Guatemala | Quiché | Pachalúm                     | Guatemala | Santa Rosa | Santa Rosa de<br>Lima   |
| <b>Central America and Caribbean</b> | Guatemala | Quiché | Patzité                      | Guatemala | Sololá     | NA                      |
| <b>Central America and Caribbean</b> | Guatemala | Quiché | Sacapulas                    | Guatemala | Sololá     | NA                      |
| <b>Central America and Caribbean</b> | Guatemala | Quiché | San Andrés Sajcabajá         | Guatemala | Sololá     | Concepción              |
| <b>Central America and Caribbean</b> | Guatemala | Quiché | San Antonio Ilotenango       | Guatemala | Sololá     | Nahualá                 |
| <b>Central America and Caribbean</b> | Guatemala | Quiché | San Bartolomé<br>Jocotenango | Guatemala | Sololá     | Panajachel              |
| <b>Central America and Caribbean</b> | Guatemala | Quiché | San Juan Cotzal              | Guatemala | Sololá     | San Andrés<br>Semetabaj |
| <b>Central America and Caribbean</b> | Guatemala | Quiché | San Pedro Jocopilas          | Guatemala | Sololá     | San Antonio<br>Palopó   |
| <b>Central America and Caribbean</b> | Guatemala | Quiché | Santa Cruz del Quiché        | Guatemala | Sololá     | San José Chacayá        |
| <b>Central America and Caribbean</b> | Guatemala | Quiché | Uspantán                     | Guatemala | Sololá     | San Juan La<br>Laguna   |

|                                      |           |              |                             |           |               |                           |
|--------------------------------------|-----------|--------------|-----------------------------|-----------|---------------|---------------------------|
| <b>Central America and Caribbean</b> | Guatemala | Quiché       | Zacualpa                    | Guatemala | Sololá        | San Lucas Tolimán         |
| <b>Central America and Caribbean</b> | Guatemala | Sacatepéquez | NA                          | Guatemala | Sololá        | San Marcos La Laguna      |
| <b>Central America and Caribbean</b> | Guatemala | Sacatepéquez | Antigua Guatemala           | Guatemala | Sololá        | San Pablo La Laguna       |
| <b>Central America and Caribbean</b> | Guatemala | Sacatepéquez | Ciudad Vieja                | Guatemala | Sololá        | San Pedro La Laguna       |
| <b>Central America and Caribbean</b> | Guatemala | Sacatepéquez | Jocotenango                 | Guatemala | Sololá        | Santa Catarina Ixtahuacan |
| <b>Central America and Caribbean</b> | Guatemala | Sacatepéquez | Magdalena Milpas Altas      | Guatemala | Sololá        | Santa Catarina Palopó     |
| <b>Central America and Caribbean</b> | Guatemala | Sacatepéquez | Pastores                    | Guatemala | Sololá        | Santa Clara La Laguna     |
| <b>Central America and Caribbean</b> | Guatemala | Sacatepéquez | San Antonio Aguas Calientes | Guatemala | Sololá        | Santa Cruz La Laguna      |
| <b>Central America and Caribbean</b> | Guatemala | Sacatepéquez | San Bartolomé Milpas Altas  | Guatemala | Sololá        | Santa Lucía Utatlán       |
| <b>Central America and Caribbean</b> | Guatemala | Sacatepéquez | San Lucas Sacatepéquez      | Guatemala | Sololá        | Santa María Visitación    |
| <b>Central America and Caribbean</b> | Guatemala | Sacatepéquez | San Miguel Dueñas           | Guatemala | Sololá        | Santiago Atitlán          |
| <b>Central America and Caribbean</b> | Guatemala | Sacatepéquez | Santa Catarina Barahona     | Guatemala | Sololá        | Sololá                    |
| <b>Central America and Caribbean</b> | Guatemala | Sacatepéquez | Santa Lucía Milpas Altas    | Guatemala | Suchitepéquez | NA                        |
| <b>Central America and Caribbean</b> | Guatemala | Sacatepéquez | Santa María de Jesús        | Guatemala | Suchitepéquez | Chicacao                  |
| <b>Central America and Caribbean</b> | Guatemala | Sacatepéquez | Santiago Sacatepéquez       | Guatemala | Suchitepéquez | Samayac                   |

|                                      |           |              |                          |           |             |                           |
|--------------------------------------|-----------|--------------|--------------------------|-----------|-------------|---------------------------|
| <b>Central America and Caribbean</b> | Guatemala | Sacatepéquez | Santo Domingo Xenacoj    | Guatemala | Totonicapán | NA                        |
| <b>Central America and Caribbean</b> | Guatemala | Sacatepéquez | Sumpango                 | Guatemala | Totonicapán | Momostenango              |
| <b>Central America and Caribbean</b> | Guatemala | San Marcos   | NA                       | Guatemala | Totonicapán | San Andrés Xecul          |
| <b>Central America and Caribbean</b> | Guatemala | San Marcos   | Comitancillo             | Guatemala | Totonicapán | San Bartolo               |
| <b>Central America and Caribbean</b> | Guatemala | San Marcos   | Concepción Tutuapa       | Guatemala | Totonicapán | San Cristóbal Totonicapán |
| <b>Central America and Caribbean</b> | Guatemala | San Marcos   | El Tumbador              | Guatemala | Totonicapán | San Francisco El Alto     |
| <b>Central America and Caribbean</b> | Guatemala | San Marcos   | Esquipulas Palo Gordo    | Guatemala | Totonicapán | Santa Lucía La Reforma    |
| <b>Central America and Caribbean</b> | Guatemala | San Marcos   | Ixchiguan                | Guatemala | Totonicapán | Santa María Chiquimula    |
| <b>Central America and Caribbean</b> | Guatemala | San Marcos   | La Reforma               | Guatemala | Totonicapán | Totonicapán               |
| <b>Central America and Caribbean</b> | Guatemala | San Marcos   | Nuevo Progreso           | Haiti     | Nord-Est    | Vallières                 |
| <b>Central America and Caribbean</b> | Guatemala | San Marcos   | Río Blanco               | Honduras  | Copán       | NA                        |
| <b>Central America and Caribbean</b> | Guatemala | San Marcos   | San Antonio Sacatepéquez | Honduras  | Copán       | Cabañas                   |
| <b>Central America and Caribbean</b> | Guatemala | San Marcos   | San Cristobal Cucho      | Honduras  | Copán       | Concepción                |
| <b>Central America and Caribbean</b> | Guatemala | San Marcos   | San José Ojetenam        | Honduras  | Copán       | Copán Ruinas              |
| <b>Central America and Caribbean</b> | Guatemala | San Marcos   | San Lorenzo              | Honduras  | Copán       | La Unión                  |

|                                      |           |            |                             |          |            |                  |
|--------------------------------------|-----------|------------|-----------------------------|----------|------------|------------------|
| <b>Central America and Caribbean</b> | Guatemala | San Marcos | San Marcos                  | Honduras | Copán      | Santa Rita       |
| <b>Central America and Caribbean</b> | Guatemala | San Marcos | San Miguel Ixtahuacán       | Honduras | Lempira    | Cololaca         |
| <b>Central America and Caribbean</b> | Guatemala | San Marcos | San Pablo                   | Honduras | Lempira    | Guarita          |
| <b>Central America and Caribbean</b> | Guatemala | San Marcos | San Pedro Sacatepéquez      | Honduras | Lempira    | La Virtud        |
| <b>Central America and Caribbean</b> | Guatemala | San Marcos | San Rafael Pie de la Cuesta | Honduras | Lempira    | Mapulaca         |
| <b>Central America and Caribbean</b> | Guatemala | San Marcos | San Sibinal                 | Honduras | Lempira    | San Sebastian    |
| <b>Central America and Caribbean</b> | Guatemala | San Marcos | Sipacapa                    | Honduras | Lempira    | Talgua           |
| <b>Central America and Caribbean</b> | Guatemala | San Marcos | Tacaná                      | Honduras | Lempira    | Virginia         |
| <b>Central America and Caribbean</b> | Guatemala | San Marcos | Tajumulco                   | Honduras | Ocotepeque | NA               |
| <b>Central America and Caribbean</b> | Guatemala | San Marcos | Tejutla                     | Honduras | Ocotepeque | Belén Gualcho    |
| <b>Central America and Caribbean</b> | Guatemala | Santa Rosa | Santa Cruz Naranjo          | Honduras | Ocotepeque | Concepción       |
| <b>Central America and Caribbean</b> | Guatemala | Santa Rosa | Santa Rosa de Lima          | Honduras | Ocotepeque | Dolores Merendon |
| <b>Central America and Caribbean</b> | Guatemala | Sololá     | NA                          | Honduras | Ocotepeque | Fraternidad      |
| <b>Central America and Caribbean</b> | Guatemala | Sololá     | NA                          | Honduras | Ocotepeque | La Encarnación   |
| <b>Central America and Caribbean</b> | Guatemala | Sololá     | Concepción                  | Honduras | Ocotepeque | La Labor         |

|                                      |           |        |                           |          |            |                           |
|--------------------------------------|-----------|--------|---------------------------|----------|------------|---------------------------|
| <b>Central America and Caribbean</b> | Guatemala | Sololá | Nahualá                   | Honduras | Ocotepeque | Lucerna                   |
| <b>Central America and Caribbean</b> | Guatemala | Sololá | Panajachel                | Honduras | Ocotepeque | Mercedes                  |
| <b>Central America and Caribbean</b> | Guatemala | Sololá | San Andrés Semetabaj      | Honduras | Ocotepeque | Ocotepeque                |
| <b>Central America and Caribbean</b> | Guatemala | Sololá | San Antonio Palopó        | Honduras | Ocotepeque | San Fernando              |
| <b>Central America and Caribbean</b> | Guatemala | Sololá | San José Chacayá          | Honduras | Ocotepeque | San Francisco del Valle   |
| <b>Central America and Caribbean</b> | Guatemala | Sololá | San Juan La Laguna        | Honduras | Ocotepeque | San Jorge                 |
| <b>Central America and Caribbean</b> | Guatemala | Sololá | San Lucas Tolimán         | Honduras | Ocotepeque | San Marcos                |
| <b>Central America and Caribbean</b> | Guatemala | Sololá | San Marcos La Laguna      | Honduras | Ocotepeque | Santa Fé                  |
| <b>Central America and Caribbean</b> | Guatemala | Sololá | San Pablo La Laguna       | Honduras | Ocotepeque | Sensenti                  |
| <b>Central America and Caribbean</b> | Guatemala | Sololá | San Pedro La Laguna       | Honduras | Ocotepeque | Sinuapa                   |
| <b>Central America and Caribbean</b> | Guatemala | Sololá | Santa Catarina Ixtahuacan | Mexico   | Chiapas    | Amatenango De La Frontera |
| <b>Central America and Caribbean</b> | Guatemala | Sololá | Santa Catarina Palopó     | Mexico   | Chiapas    | Bejucal De Ocampo         |
| <b>Central America and Caribbean</b> | Guatemala | Sololá | Santa Clara La Laguna     | Mexico   | Chiapas    | Bella Vista               |
| <b>Central America and Caribbean</b> | Guatemala | Sololá | Santa Cruz La Laguna      | Mexico   | Chiapas    | Cacahoatan                |
| <b>Central America and Caribbean</b> | Guatemala | Sololá | Santa Lucía Utatlán       | Mexico   | Chiapas    | Chicomuselo               |

|                                      |           |             |                           |        |         |                      |
|--------------------------------------|-----------|-------------|---------------------------|--------|---------|----------------------|
| <b>Central America and Caribbean</b> | Guatemala | Sololá      | Santa María Visitación    | Mexico | Chiapas | Comitan De Dominguez |
| <b>Central America and Caribbean</b> | Guatemala | Sololá      | Santiago Atitlán          | Mexico | Chiapas | El Porvenir          |
| <b>Central America and Caribbean</b> | Guatemala | Sololá      | Sololá                    | Mexico | Chiapas | Escuintla            |
| <b>Central America and Caribbean</b> | Guatemala | Totonicapán | NA                        | Mexico | Chiapas | Frontera Comalapa    |
| <b>Central America and Caribbean</b> | Guatemala | Totonicapán | Momostenango              | Mexico | Chiapas | Frontera Hidalgo     |
| <b>Central America and Caribbean</b> | Guatemala | Totonicapán | San Andrés Xecul          | Mexico | Chiapas | Huehuetan            |
| <b>Central America and Caribbean</b> | Guatemala | Totonicapán | San Bartolo               | Mexico | Chiapas | Huixtla              |
| <b>Central America and Caribbean</b> | Guatemala | Totonicapán | San Cristóbal Totonicapán | Mexico | Chiapas | La Grandeza          |
| <b>Central America and Caribbean</b> | Guatemala | Totonicapán | San Francisco El Alto     | Mexico | Chiapas | La Independencia     |
| <b>Central America and Caribbean</b> | Guatemala | Totonicapán | Santa Lucía La Reforma    | Mexico | Chiapas | La Trinitaria        |
| <b>Central America and Caribbean</b> | Guatemala | Totonicapán | Santa María Chiquimula    | Mexico | Chiapas | Las Margaritas       |
| <b>Central America and Caribbean</b> | Guatemala | Totonicapán | Totonicapán               | Mexico | Chiapas | Maravilla Tenejapa   |
| <b>Central America and Caribbean</b> | Honduras  | Copán       | NA                        | Mexico | Chiapas | Mazapa De Madero     |
| <b>Central America and Caribbean</b> | Honduras  | Copán       | Cabañas                   | Mexico | Chiapas | Mazatan              |
| <b>Central America and Caribbean</b> | Honduras  | Copán       | Concepción                | Mexico | Chiapas | Metapa               |



|                                      |          |       |                     |        |           |                     |
|--------------------------------------|----------|-------|---------------------|--------|-----------|---------------------|
| <b>Central America and Caribbean</b> | Honduras | Copán | Copán Ruinas        | Mexico | Chiapas   | Motozintla          |
| <b>Central America and Caribbean</b> | Honduras | Copán | Corquín             | Mexico | Chiapas   | Siltepec            |
| <b>Central America and Caribbean</b> | Honduras | Copán | Cucuyagua           | Mexico | Chiapas   | Tapachula           |
| <b>Central America and Caribbean</b> | Honduras | Copán | Dolores             | Mexico | Chiapas   | Tuxtla Chico        |
| <b>Central America and Caribbean</b> | Honduras | Copán | Dulce Nombre        | Mexico | Chiapas   | Tuzantan            |
| <b>Central America and Caribbean</b> | Honduras | Copán | La Unión            | Mexico | Chiapas   | Tzimol              |
| <b>Central America and Caribbean</b> | Honduras | Copán | San Agustín         | Mexico | Chiapas   | Union Juarez        |
| <b>Central America and Caribbean</b> | Honduras | Copán | San Jerónimo        | Mexico | Chiapas   | Villa Comaltitlan   |
| <b>Central America and Caribbean</b> | Honduras | Copán | San José            | Mexico | Chihuahua | Ignacio Zaragoza    |
| <b>Central America and Caribbean</b> | Honduras | Copán | San Juan de Opoa    | Mexico | Chihuahua | Janos               |
| <b>Central America and Caribbean</b> | Honduras | Copán | San Nicolás         | Mexico | Durango   | Coneto De Comonfort |
| <b>Central America and Caribbean</b> | Honduras | Copán | San Pedro           | Mexico | Durango   | Hidalgo             |
| <b>Central America and Caribbean</b> | Honduras | Copán | Santa Rita          | Mexico | Durango   | Rodeo               |
| <b>Central America and Caribbean</b> | Honduras | Copán | Santa Rosa de Copán | Mexico | Sinaloa   | Choix               |
| <b>Central America and Caribbean</b> | Honduras | Copán | Veracruz            | Mexico | Zacatecas | Mazapil             |

|                                      |          |          |               |        |           |                |
|--------------------------------------|----------|----------|---------------|--------|-----------|----------------|
| <b>Central America and Caribbean</b> | Honduras | Intibucá | Colomoncagua  | Mexico | Zacatecas | Melchor Ocampo |
| <b>Central America and Caribbean</b> | Honduras | Intibucá | Dolores       | NA     | NA        | NA             |
| <b>Central America and Caribbean</b> | Honduras | Intibucá | San Antonio   | NA     | NA        | NA             |
| <b>Central America and Caribbean</b> | Honduras | Intibucá | San Juan      | NA     | NA        | NA             |
| <b>Central America and Caribbean</b> | Honduras | Intibucá | San Miguelito | NA     | NA        | NA             |
| <b>Central America and Caribbean</b> | Honduras | Intibucá | Santa Lucía   | NA     | NA        | NA             |
| <b>Central America and Caribbean</b> | Honduras | Intibucá | Yamaranguila  | NA     | NA        | NA             |
| <b>Central America and Caribbean</b> | Honduras | Lempira  | NA            | NA     | NA        | NA             |
| <b>Central America and Caribbean</b> | Honduras | Lempira  | Candelaria    | NA     | NA        | NA             |
| <b>Central America and Caribbean</b> | Honduras | Lempira  | Cololaca      | NA     | NA        | NA             |
| <b>Central America and Caribbean</b> | Honduras | Lempira  | Erandique     | NA     | NA        | NA             |
| <b>Central America and Caribbean</b> | Honduras | Lempira  | Guarita       | NA     | NA        | NA             |
| <b>Central America and Caribbean</b> | Honduras | Lempira  | La Campa      | NA     | NA        | NA             |
| <b>Central America and Caribbean</b> | Honduras | Lempira  | La Virtud     | NA     | NA        | NA             |
| <b>Central America and Caribbean</b> | Honduras | Lempira  | Mapulaca      | NA     | NA        | NA             |

|                                      |          |            |                       |    |    |    |
|--------------------------------------|----------|------------|-----------------------|----|----|----|
| <b>Central America and Caribbean</b> | Honduras | Lempira    | San Andrés            | NA | NA | NA |
| <b>Central America and Caribbean</b> | Honduras | Lempira    | San Juan Guarita      | NA | NA | NA |
| <b>Central America and Caribbean</b> | Honduras | Lempira    | San Manuel Colohete   | NA | NA | NA |
| <b>Central America and Caribbean</b> | Honduras | Lempira    | San Marcos de Caiquín | NA | NA | NA |
| <b>Central America and Caribbean</b> | Honduras | Lempira    | San Sebastian         | NA | NA | NA |
| <b>Central America and Caribbean</b> | Honduras | Lempira    | Santa Cruz            | NA | NA | NA |
| <b>Central America and Caribbean</b> | Honduras | Lempira    | Talgua                | NA | NA | NA |
| <b>Central America and Caribbean</b> | Honduras | Lempira    | Tambla                | NA | NA | NA |
| <b>Central America and Caribbean</b> | Honduras | Lempira    | Tomalá                | NA | NA | NA |
| <b>Central America and Caribbean</b> | Honduras | Lempira    | Valladolid            | NA | NA | NA |
| <b>Central America and Caribbean</b> | Honduras | Lempira    | Virginia              | NA | NA | NA |
| <b>Central America and Caribbean</b> | Honduras | Ocotepeque | NA                    | NA | NA | NA |
| <b>Central America and Caribbean</b> | Honduras | Ocotepeque | Belén Gualcho         | NA | NA | NA |
| <b>Central America and Caribbean</b> | Honduras | Ocotepeque | Concepción            | NA | NA | NA |
| <b>Central America and Caribbean</b> | Honduras | Ocotepeque | Dolores Merendon      | NA | NA | NA |

|                                      |          |                |                         |    |    |    |
|--------------------------------------|----------|----------------|-------------------------|----|----|----|
| <b>Central America and Caribbean</b> | Honduras | Ocotepeque     | Fraternidad             | NA | NA | NA |
| <b>Central America and Caribbean</b> | Honduras | Ocotepeque     | La Encarnación          | NA | NA | NA |
| <b>Central America and Caribbean</b> | Honduras | Ocotepeque     | La Labor                | NA | NA | NA |
| <b>Central America and Caribbean</b> | Honduras | Ocotepeque     | Lucerna                 | NA | NA | NA |
| <b>Central America and Caribbean</b> | Honduras | Ocotepeque     | Mercedes                | NA | NA | NA |
| <b>Central America and Caribbean</b> | Honduras | Ocotepeque     | Ocotepeque              | NA | NA | NA |
| <b>Central America and Caribbean</b> | Honduras | Ocotepeque     | San Fernando            | NA | NA | NA |
| <b>Central America and Caribbean</b> | Honduras | Ocotepeque     | San Francisco del Valle | NA | NA | NA |
| <b>Central America and Caribbean</b> | Honduras | Ocotepeque     | San Jorge               | NA | NA | NA |
| <b>Central America and Caribbean</b> | Honduras | Ocotepeque     | San Marcos              | NA | NA | NA |
| <b>Central America and Caribbean</b> | Honduras | Ocotepeque     | Santa Fé                | NA | NA | NA |
| <b>Central America and Caribbean</b> | Honduras | Ocotepeque     | Sensenti                | NA | NA | NA |
| <b>Central America and Caribbean</b> | Honduras | Ocotepeque     | Sinuapa                 | NA | NA | NA |
| <b>Central America and Caribbean</b> | Mexico   | NA             | NA                      | NA | NA | NA |
| <b>Central America and Caribbean</b> | Mexico   | Aguascalientes | NA                      | NA | NA | NA |

|                                      |        |                 |                           |    |    |    |
|--------------------------------------|--------|-----------------|---------------------------|----|----|----|
| <b>Central America and Caribbean</b> | Mexico | Aguascalientes  | Aguascalientes            | NA | NA | NA |
| <b>Central America and Caribbean</b> | Mexico | Aguascalientes  | Asientos                  | NA | NA | NA |
| <b>Central America and Caribbean</b> | Mexico | Aguascalientes  | Cosio                     | NA | NA | NA |
| <b>Central America and Caribbean</b> | Mexico | Aguascalientes  | El Llano                  | NA | NA | NA |
| <b>Central America and Caribbean</b> | Mexico | Aguascalientes  | Jesus Maria               | NA | NA | NA |
| <b>Central America and Caribbean</b> | Mexico | Aguascalientes  | Pabellon De Arteaga       | NA | NA | NA |
| <b>Central America and Caribbean</b> | Mexico | Aguascalientes  | San Francisco De Los Romo | NA | NA | NA |
| <b>Central America and Caribbean</b> | Mexico | Aguascalientes  | San Jose De Gracia        | NA | NA | NA |
| <b>Central America and Caribbean</b> | Mexico | Baja California | Mexicali                  | NA | NA | NA |
| <b>Central America and Caribbean</b> | Mexico | Chiapas         | Acacoyagua                | NA | NA | NA |
| <b>Central America and Caribbean</b> | Mexico | Chiapas         | Acapetahua                | NA | NA | NA |
| <b>Central America and Caribbean</b> | Mexico | Chiapas         | Amatenango De La Frontera | NA | NA | NA |
| <b>Central America and Caribbean</b> | Mexico | Chiapas         | Bejucal De Ocampo         | NA | NA | NA |
| <b>Central America and Caribbean</b> | Mexico | Chiapas         | Bella Vista               | NA | NA | NA |
| <b>Central America and Caribbean</b> | Mexico | Chiapas         | Cacahoatan                | NA | NA | NA |

|                                      |        |         |                      |    |    |    |
|--------------------------------------|--------|---------|----------------------|----|----|----|
| <b>Central America and Caribbean</b> | Mexico | Chiapas | Chicomuselo          | NA | NA | NA |
| <b>Central America and Caribbean</b> | Mexico | Chiapas | Comitan De Dominguez | NA | NA | NA |
| <b>Central America and Caribbean</b> | Mexico | Chiapas | El Porvenir          | NA | NA | NA |
| <b>Central America and Caribbean</b> | Mexico | Chiapas | Escuintla            | NA | NA | NA |
| <b>Central America and Caribbean</b> | Mexico | Chiapas | Frontera Comalapa    | NA | NA | NA |
| <b>Central America and Caribbean</b> | Mexico | Chiapas | Frontera Hidalgo     | NA | NA | NA |
| <b>Central America and Caribbean</b> | Mexico | Chiapas | Huehuetan            | NA | NA | NA |
| <b>Central America and Caribbean</b> | Mexico | Chiapas | Huixtla              | NA | NA | NA |
| <b>Central America and Caribbean</b> | Mexico | Chiapas | La Grandeza          | NA | NA | NA |
| <b>Central America and Caribbean</b> | Mexico | Chiapas | La Independencia     | NA | NA | NA |
| <b>Central America and Caribbean</b> | Mexico | Chiapas | La Trinitaria        | NA | NA | NA |
| <b>Central America and Caribbean</b> | Mexico | Chiapas | Las Margaritas       | NA | NA | NA |
| <b>Central America and Caribbean</b> | Mexico | Chiapas | Maravilla Tenejapa   | NA | NA | NA |
| <b>Central America and Caribbean</b> | Mexico | Chiapas | Mazapa De Madero     | NA | NA | NA |
| <b>Central America and Caribbean</b> | Mexico | Chiapas | Mazatan              | NA | NA | NA |

|                                      |        |           |                   |    |    |    |
|--------------------------------------|--------|-----------|-------------------|----|----|----|
| <b>Central America and Caribbean</b> | Mexico | Chiapas   | Metapa            | NA | NA | NA |
| <b>Central America and Caribbean</b> | Mexico | Chiapas   | Motozintla        | NA | NA | NA |
| <b>Central America and Caribbean</b> | Mexico | Chiapas   | Siltepec          | NA | NA | NA |
| <b>Central America and Caribbean</b> | Mexico | Chiapas   | Tapachula         | NA | NA | NA |
| <b>Central America and Caribbean</b> | Mexico | Chiapas   | Tuxtla Chico      | NA | NA | NA |
| <b>Central America and Caribbean</b> | Mexico | Chiapas   | Tuzantan          | NA | NA | NA |
| <b>Central America and Caribbean</b> | Mexico | Chiapas   | Tzimol            | NA | NA | NA |
| <b>Central America and Caribbean</b> | Mexico | Chiapas   | Union Juarez      | NA | NA | NA |
| <b>Central America and Caribbean</b> | Mexico | Chiapas   | Villa Comaltitlan | NA | NA | NA |
| <b>Central America and Caribbean</b> | Mexico | Chihuahua | NA                | NA | NA | NA |
| <b>Central America and Caribbean</b> | Mexico | Chihuahua | Ahumada           | NA | NA | NA |
| <b>Central America and Caribbean</b> | Mexico | Chihuahua | Aldama            | NA | NA | NA |
| <b>Central America and Caribbean</b> | Mexico | Chihuahua | Allende           | NA | NA | NA |
| <b>Central America and Caribbean</b> | Mexico | Chihuahua | Aquiles Serdan    | NA | NA | NA |
| <b>Central America and Caribbean</b> | Mexico | Chihuahua | Ascension         | NA | NA | NA |

|                                      |        |           |                         |    |    |    |
|--------------------------------------|--------|-----------|-------------------------|----|----|----|
| <b>Central America and Caribbean</b> | Mexico | Chihuahua | Bachiniva               | NA | NA | NA |
| <b>Central America and Caribbean</b> | Mexico | Chihuahua | Bocoyna                 | NA | NA | NA |
| <b>Central America and Caribbean</b> | Mexico | Chihuahua | Buenaventura            | NA | NA | NA |
| <b>Central America and Caribbean</b> | Mexico | Chihuahua | Camargo                 | NA | NA | NA |
| <b>Central America and Caribbean</b> | Mexico | Chihuahua | Carichi                 | NA | NA | NA |
| <b>Central America and Caribbean</b> | Mexico | Chihuahua | Casas Grandes           | NA | NA | NA |
| <b>Central America and Caribbean</b> | Mexico | Chihuahua | Chihuahua               | NA | NA | NA |
| <b>Central America and Caribbean</b> | Mexico | Chihuahua | Coronado                | NA | NA | NA |
| <b>Central America and Caribbean</b> | Mexico | Chihuahua | Coyame Del Sotol        | NA | NA | NA |
| <b>Central America and Caribbean</b> | Mexico | Chihuahua | Cuauhtemoc              | NA | NA | NA |
| <b>Central America and Caribbean</b> | Mexico | Chihuahua | Cusihuiachi             | NA | NA | NA |
| <b>Central America and Caribbean</b> | Mexico | Chihuahua | Delicias                | NA | NA | NA |
| <b>Central America and Caribbean</b> | Mexico | Chihuahua | Dr. Belisario Dominguez | NA | NA | NA |
| <b>Central America and Caribbean</b> | Mexico | Chihuahua | El Tule                 | NA | NA | NA |
| <b>Central America and Caribbean</b> | Mexico | Chihuahua | Galeana                 | NA | NA | NA |



|                                      |        |           |                  |    |    |    |
|--------------------------------------|--------|-----------|------------------|----|----|----|
| <b>Central America and Caribbean</b> | Mexico | Chihuahua | Gomez Farias     | NA | NA | NA |
| <b>Central America and Caribbean</b> | Mexico | Chihuahua | Gran Morelos     | NA | NA | NA |
| <b>Central America and Caribbean</b> | Mexico | Chihuahua | Guerrero         | NA | NA | NA |
| <b>Central America and Caribbean</b> | Mexico | Chihuahua | Huejotitan       | NA | NA | NA |
| <b>Central America and Caribbean</b> | Mexico | Chihuahua | Ignacio Zaragoza | NA | NA | NA |
| <b>Central America and Caribbean</b> | Mexico | Chihuahua | Janos            | NA | NA | NA |
| <b>Central America and Caribbean</b> | Mexico | Chihuahua | Jimenez          | NA | NA | NA |
| <b>Central America and Caribbean</b> | Mexico | Chihuahua | Julimes          | NA | NA | NA |
| <b>Central America and Caribbean</b> | Mexico | Chihuahua | La Cruz          | NA | NA | NA |
| <b>Central America and Caribbean</b> | Mexico | Chihuahua | Lopez            | NA | NA | NA |
| <b>Central America and Caribbean</b> | Mexico | Chihuahua | Madera           | NA | NA | NA |
| <b>Central America and Caribbean</b> | Mexico | Chihuahua | Maguarichi       | NA | NA | NA |
| <b>Central America and Caribbean</b> | Mexico | Chihuahua | Manuel Benavides | NA | NA | NA |
| <b>Central America and Caribbean</b> | Mexico | Chihuahua | Matachi          | NA | NA | NA |
| <b>Central America and Caribbean</b> | Mexico | Chihuahua | Matamoros        | NA | NA | NA |

|                                      |        |           |                          |    |    |    |
|--------------------------------------|--------|-----------|--------------------------|----|----|----|
| <b>Central America and Caribbean</b> | Mexico | Chihuahua | Meoqui                   | NA | NA | NA |
| <b>Central America and Caribbean</b> | Mexico | Chihuahua | Namiquipa                | NA | NA | NA |
| <b>Central America and Caribbean</b> | Mexico | Chihuahua | Nuevo Casas Grandes      | NA | NA | NA |
| <b>Central America and Caribbean</b> | Mexico | Chihuahua | Ocampo                   | NA | NA | NA |
| <b>Central America and Caribbean</b> | Mexico | Chihuahua | Ojinaga                  | NA | NA | NA |
| <b>Central America and Caribbean</b> | Mexico | Chihuahua | Praxedis G. Guerrero     | NA | NA | NA |
| <b>Central America and Caribbean</b> | Mexico | Chihuahua | Riva Palacio             | NA | NA | NA |
| <b>Central America and Caribbean</b> | Mexico | Chihuahua | Rosales                  | NA | NA | NA |
| <b>Central America and Caribbean</b> | Mexico | Chihuahua | Rosario                  | NA | NA | NA |
| <b>Central America and Caribbean</b> | Mexico | Chihuahua | San Francisco De Borja   | NA | NA | NA |
| <b>Central America and Caribbean</b> | Mexico | Chihuahua | San Francisco De Conchos | NA | NA | NA |
| <b>Central America and Caribbean</b> | Mexico | Chihuahua | Santa Isabel             | NA | NA | NA |
| <b>Central America and Caribbean</b> | Mexico | Chihuahua | Satevo                   | NA | NA | NA |
| <b>Central America and Caribbean</b> | Mexico | Chihuahua | Saucillo                 | NA | NA | NA |
| <b>Central America and Caribbean</b> | Mexico | Chihuahua | Temosachi                | NA | NA | NA |

|                                      |        |                      |                     |    |    |    |
|--------------------------------------|--------|----------------------|---------------------|----|----|----|
| <b>Central America and Caribbean</b> | Mexico | Chihuahua            | Valle De Zaragoza   | NA | NA | NA |
| <b>Central America and Caribbean</b> | Mexico | Coahuila De Zaragoza | NA                  | NA | NA | NA |
| <b>Central America and Caribbean</b> | Mexico | Coahuila De Zaragoza | Francisco I. Madero | NA | NA | NA |
| <b>Central America and Caribbean</b> | Mexico | Coahuila De Zaragoza | General Cepeda      | NA | NA | NA |
| <b>Central America and Caribbean</b> | Mexico | Coahuila De Zaragoza | Matamoros           | NA | NA | NA |
| <b>Central America and Caribbean</b> | Mexico | Coahuila De Zaragoza | Ocampo              | NA | NA | NA |
| <b>Central America and Caribbean</b> | Mexico | Coahuila De Zaragoza | Parras              | NA | NA | NA |
| <b>Central America and Caribbean</b> | Mexico | Coahuila De Zaragoza | San Pedro           | NA | NA | NA |
| <b>Central America and Caribbean</b> | Mexico | Coahuila De Zaragoza | Sierra Mojada       | NA | NA | NA |
| <b>Central America and Caribbean</b> | Mexico | Coahuila De Zaragoza | Torreon             | NA | NA | NA |
| <b>Central America and Caribbean</b> | Mexico | Coahuila De Zaragoza | Viesca              | NA | NA | NA |
| <b>Central America and Caribbean</b> | Mexico | Durango              | NA                  | NA | NA | NA |
| <b>Central America and Caribbean</b> | Mexico | Durango              | Coneto De Comonfort | NA | NA | NA |
| <b>Central America and Caribbean</b> | Mexico | Durango              | Cuencame            | NA | NA | NA |
| <b>Central America and Caribbean</b> | Mexico | Durango              | El Oro              | NA | NA | NA |

|                                      |        |         |                       |    |    |    |
|--------------------------------------|--------|---------|-----------------------|----|----|----|
| <b>Central America and Caribbean</b> | Mexico | Durango | Gomez Palacio         | NA | NA | NA |
| <b>Central America and Caribbean</b> | Mexico | Durango | Gral. Simon Bolivar   | NA | NA | NA |
| <b>Central America and Caribbean</b> | Mexico | Durango | Hidalgo               | NA | NA | NA |
| <b>Central America and Caribbean</b> | Mexico | Durango | Inde                  | NA | NA | NA |
| <b>Central America and Caribbean</b> | Mexico | Durango | Lerdo                 | NA | NA | NA |
| <b>Central America and Caribbean</b> | Mexico | Durango | Mapimi                | NA | NA | NA |
| <b>Central America and Caribbean</b> | Mexico | Durango | Nazas                 | NA | NA | NA |
| <b>Central America and Caribbean</b> | Mexico | Durango | Nuevo Ideal           | NA | NA | NA |
| <b>Central America and Caribbean</b> | Mexico | Durango | Ocampo                | NA | NA | NA |
| <b>Central America and Caribbean</b> | Mexico | Durango | Penon Blanco          | NA | NA | NA |
| <b>Central America and Caribbean</b> | Mexico | Durango | Rodeo                 | NA | NA | NA |
| <b>Central America and Caribbean</b> | Mexico | Durango | San Bernardo          | NA | NA | NA |
| <b>Central America and Caribbean</b> | Mexico | Durango | San Juan De Guadalupe | NA | NA | NA |
| <b>Central America and Caribbean</b> | Mexico | Durango | San Juan Del Rio      | NA | NA | NA |
| <b>Central America and Caribbean</b> | Mexico | Durango | San Luis Del Cordero  | NA | NA | NA |

|                                      |        |            |                      |    |    |    |
|--------------------------------------|--------|------------|----------------------|----|----|----|
| <b>Central America and Caribbean</b> | Mexico | Durango    | San Pedro Del Gallo  | NA | NA | NA |
| <b>Central America and Caribbean</b> | Mexico | Durango    | Santa Clara          | NA | NA | NA |
| <b>Central America and Caribbean</b> | Mexico | Durango    | Santiago Papasquiaro | NA | NA | NA |
| <b>Central America and Caribbean</b> | Mexico | Durango    | Tepehuanes           | NA | NA | NA |
| <b>Central America and Caribbean</b> | Mexico | Durango    | Tlahualilo           | NA | NA | NA |
| <b>Central America and Caribbean</b> | Mexico | Guanajuato | NA                   | NA | NA | NA |
| <b>Central America and Caribbean</b> | Mexico | Guanajuato | Abasolo              | NA | NA | NA |
| <b>Central America and Caribbean</b> | Mexico | Guanajuato | Cueramaro            | NA | NA | NA |
| <b>Central America and Caribbean</b> | Mexico | Guanajuato | Huanimaro            | NA | NA | NA |
| <b>Central America and Caribbean</b> | Mexico | Guanajuato | Irapuato             | NA | NA | NA |
| <b>Central America and Caribbean</b> | Mexico | Guanajuato | Jaral Del Progreso   | NA | NA | NA |
| <b>Central America and Caribbean</b> | Mexico | Guanajuato | Manuel Doblado       | NA | NA | NA |
| <b>Central America and Caribbean</b> | Mexico | Guanajuato | Penjamo              | NA | NA | NA |
| <b>Central America and Caribbean</b> | Mexico | Guanajuato | Pueblo Nuevo         | NA | NA | NA |
| <b>Central America and Caribbean</b> | Mexico | Guanajuato | Romita               | NA | NA | NA |

|                                      |        |                     |                            |    |    |    |
|--------------------------------------|--------|---------------------|----------------------------|----|----|----|
| <b>Central America and Caribbean</b> | Mexico | Guanajuato          | Salamanca                  | NA | NA | NA |
| <b>Central America and Caribbean</b> | Mexico | Guanajuato          | Silao                      | NA | NA | NA |
| <b>Central America and Caribbean</b> | Mexico | Guanajuato          | Valle De Santiago          | NA | NA | NA |
| <b>Central America and Caribbean</b> | Mexico | Guanajuato          | Villagran                  | NA | NA | NA |
| <b>Central America and Caribbean</b> | Mexico | Jalisco             | Chimaltitan                | NA | NA | NA |
| <b>Central America and Caribbean</b> | Mexico | Jalisco             | Encarnacion De Diaz        | NA | NA | NA |
| <b>Central America and Caribbean</b> | Mexico | Jalisco             | Jalostotitlan              | NA | NA | NA |
| <b>Central America and Caribbean</b> | Mexico | Jalisco             | Mexicacan                  | NA | NA | NA |
| <b>Central America and Caribbean</b> | Mexico | Jalisco             | San Juan De Los Lagos      | NA | NA | NA |
| <b>Central America and Caribbean</b> | Mexico | Jalisco             | San Martin De Bolanos      | NA | NA | NA |
| <b>Central America and Caribbean</b> | Mexico | Jalisco             | Santa Maria De Los Angeles | NA | NA | NA |
| <b>Central America and Caribbean</b> | Mexico | Michoacán De Ocampo | NA                         | NA | NA | NA |
| <b>Central America and Caribbean</b> | Mexico | Michoacán De Ocampo | Angamacutiro               | NA | NA | NA |
| <b>Central America and Caribbean</b> | Mexico | Michoacán De Ocampo | Caracuaro                  | NA | NA | NA |
| <b>Central America and Caribbean</b> | Mexico | Michoacán De Ocampo | Churintzio                 | NA | NA | NA |

|                                      |        |                     |                             |    |    |    |
|--------------------------------------|--------|---------------------|-----------------------------|----|----|----|
| <b>Central America and Caribbean</b> | Mexico | Michoacán De Ocampo | Churumuco                   | NA | NA | NA |
| <b>Central America and Caribbean</b> | Mexico | Michoacán De Ocampo | Huetamo                     | NA | NA | NA |
| <b>Central America and Caribbean</b> | Mexico | Michoacán De Ocampo | Jimenez                     | NA | NA | NA |
| <b>Central America and Caribbean</b> | Mexico | Michoacán De Ocampo | Jose Sixto Verduzco         | NA | NA | NA |
| <b>Central America and Caribbean</b> | Mexico | Michoacán De Ocampo | La Huacana                  | NA | NA | NA |
| <b>Central America and Caribbean</b> | Mexico | Michoacán De Ocampo | La Piedad                   | NA | NA | NA |
| <b>Central America and Caribbean</b> | Mexico | Michoacán De Ocampo | Nocupetaro                  | NA | NA | NA |
| <b>Central America and Caribbean</b> | Mexico | Michoacán De Ocampo | Numaran                     | NA | NA | NA |
| <b>Central America and Caribbean</b> | Mexico | Michoacán De Ocampo | Panindicuaro                | NA | NA | NA |
| <b>Central America and Caribbean</b> | Mexico | Michoacán De Ocampo | Penjamillo                  | NA | NA | NA |
| <b>Central America and Caribbean</b> | Mexico | Michoacán De Ocampo | Puruandiro                  | NA | NA | NA |
| <b>Central America and Caribbean</b> | Mexico | Michoacán De Ocampo | San Lucas                   | NA | NA | NA |
| <b>Central America and Caribbean</b> | Mexico | Michoacán De Ocampo | Tiquicheo De Nicolas Romero | NA | NA | NA |
| <b>Central America and Caribbean</b> | Mexico | Michoacán De Ocampo | Tlazazalca                  | NA | NA | NA |
| <b>Central America and Caribbean</b> | Mexico | Michoacán De Ocampo | Zacapu                      | NA | NA | NA |

|                                      |        |                     |                         |    |    |    |
|--------------------------------------|--------|---------------------|-------------------------|----|----|----|
| <b>Central America and Caribbean</b> | Mexico | Michoacán De Ocampo | Zinaparo                | NA | NA | NA |
| <b>Central America and Caribbean</b> | Mexico | México              | Aculco                  | NA | NA | NA |
| <b>Central America and Caribbean</b> | Mexico | México              | Atlacomulco             | NA | NA | NA |
| <b>Central America and Caribbean</b> | Mexico | México              | Chapa De Mota           | NA | NA | NA |
| <b>Central America and Caribbean</b> | Mexico | México              | Coyotepec               | NA | NA | NA |
| <b>Central America and Caribbean</b> | Mexico | México              | Huehuetoca              | NA | NA | NA |
| <b>Central America and Caribbean</b> | Mexico | México              | Jilotepec               | NA | NA | NA |
| <b>Central America and Caribbean</b> | Mexico | México              | Jocotitlan              | NA | NA | NA |
| <b>Central America and Caribbean</b> | Mexico | México              | Morelos                 | NA | NA | NA |
| <b>Central America and Caribbean</b> | Mexico | México              | Polotitlan              | NA | NA | NA |
| <b>Central America and Caribbean</b> | Mexico | México              | Soyaniquilpan De Juarez | NA | NA | NA |
| <b>Central America and Caribbean</b> | Mexico | México              | Timilpan                | NA | NA | NA |
| <b>Central America and Caribbean</b> | Mexico | México              | Villa Del Carbon        | NA | NA | NA |
| <b>Central America and Caribbean</b> | Mexico | Nayarit             | Ahuacatlan              | NA | NA | NA |
| <b>Central America and Caribbean</b> | Mexico | Nayarit             | Amatlan De Canas        | NA | NA | NA |



|                                      |        |            |                      |    |    |    |
|--------------------------------------|--------|------------|----------------------|----|----|----|
| <b>Central America and Caribbean</b> | Mexico | Nayarit    | Ixtlan Del Rio       | NA | NA | NA |
| <b>Central America and Caribbean</b> | Mexico | Nayarit    | Jala                 | NA | NA | NA |
| <b>Central America and Caribbean</b> | Mexico | Nayarit    | La Yesca             | NA | NA | NA |
| <b>Central America and Caribbean</b> | Mexico | Nayarit    | San Pedro Lagunillas | NA | NA | NA |
| <b>Central America and Caribbean</b> | Mexico | Nayarit    | Santa Maria Del Oro  | NA | NA | NA |
| <b>Central America and Caribbean</b> | Mexico | Nuevo León | Aramberri            | NA | NA | NA |
| <b>Central America and Caribbean</b> | Mexico | Nuevo León | Dr. Arroyo           | NA | NA | NA |
| <b>Central America and Caribbean</b> | Mexico | Nuevo León | Galeana              | NA | NA | NA |
| <b>Central America and Caribbean</b> | Mexico | Nuevo León | Gral. Zaragoza       | NA | NA | NA |
| <b>Central America and Caribbean</b> | Mexico | Nuevo León | Hualahuises          | NA | NA | NA |
| <b>Central America and Caribbean</b> | Mexico | Nuevo León | Iturbide             | NA | NA | NA |
| <b>Central America and Caribbean</b> | Mexico | Nuevo León | Linares              | NA | NA | NA |
| <b>Central America and Caribbean</b> | Mexico | Nuevo León | Mier Y Noriega       | NA | NA | NA |
| <b>Central America and Caribbean</b> | Mexico | Nuevo León | Rayones              | NA | NA | NA |
| <b>Central America and Caribbean</b> | Mexico | Oaxaca     | Asuncion Tlacolulita | NA | NA | NA |

|                                      |        |        |                        |    |    |    |
|--------------------------------------|--------|--------|------------------------|----|----|----|
| <b>Central America and Caribbean</b> | Mexico | Puebla | Acatzingo              | NA | NA | NA |
| <b>Central America and Caribbean</b> | Mexico | Puebla | Ahuatlan               | NA | NA | NA |
| <b>Central America and Caribbean</b> | Mexico | Puebla | Ahuehuetitla           | NA | NA | NA |
| <b>Central America and Caribbean</b> | Mexico | Puebla | Ajalpan                | NA | NA | NA |
| <b>Central America and Caribbean</b> | Mexico | Puebla | Aljojuca               | NA | NA | NA |
| <b>Central America and Caribbean</b> | Mexico | Puebla | Altepexi               | NA | NA | NA |
| <b>Central America and Caribbean</b> | Mexico | Puebla | Atexcal                | NA | NA | NA |
| <b>Central America and Caribbean</b> | Mexico | Puebla | Atzitzintla            | NA | NA | NA |
| <b>Central America and Caribbean</b> | Mexico | Puebla | Axutla                 | NA | NA | NA |
| <b>Central America and Caribbean</b> | Mexico | Puebla | Canada Morelos         | NA | NA | NA |
| <b>Central America and Caribbean</b> | Mexico | Puebla | Chalchicomula De Sesma | NA | NA | NA |
| <b>Central America and Caribbean</b> | Mexico | Puebla | Chapulco               | NA | NA | NA |
| <b>Central America and Caribbean</b> | Mexico | Puebla | Chigmecatitlan         | NA | NA | NA |
| <b>Central America and Caribbean</b> | Mexico | Puebla | Chila De La Sal        | NA | NA | NA |
| <b>Central America and Caribbean</b> | Mexico | Puebla | Chinantla              | NA | NA | NA |

|                                      |        |        |                              |    |    |    |
|--------------------------------------|--------|--------|------------------------------|----|----|----|
| <b>Central America and Caribbean</b> | Mexico | Puebla | Cohetzala                    | NA | NA | NA |
| <b>Central America and Caribbean</b> | Mexico | Puebla | Coxcatlan                    | NA | NA | NA |
| <b>Central America and Caribbean</b> | Mexico | Puebla | Coyomeapan                   | NA | NA | NA |
| <b>Central America and Caribbean</b> | Mexico | Puebla | Esperanza                    | NA | NA | NA |
| <b>Central America and Caribbean</b> | Mexico | Puebla | General Felipe Angeles       | NA | NA | NA |
| <b>Central America and Caribbean</b> | Mexico | Puebla | Guadalupe Victoria           | NA | NA | NA |
| <b>Central America and Caribbean</b> | Mexico | Puebla | Huatlatlauca                 | NA | NA | NA |
| <b>Central America and Caribbean</b> | Mexico | Puebla | Huehuetlan El Grande         | NA | NA | NA |
| <b>Central America and Caribbean</b> | Mexico | Puebla | Huitziltepec                 | NA | NA | NA |
| <b>Central America and Caribbean</b> | Mexico | Puebla | Juan N. Mendez               | NA | NA | NA |
| <b>Central America and Caribbean</b> | Mexico | Puebla | La Magdalena Tlatlauquitepec | NA | NA | NA |
| <b>Central America and Caribbean</b> | Mexico | Puebla | Libres                       | NA | NA | NA |
| <b>Central America and Caribbean</b> | Mexico | Puebla | Mazapiltepec De Juarez       | NA | NA | NA |
| <b>Central America and Caribbean</b> | Mexico | Puebla | Molcaxac                     | NA | NA | NA |
| <b>Central America and Caribbean</b> | Mexico | Puebla | Nicolas Bravo                | NA | NA | NA |

|                                      |        |        |                           |    |    |    |
|--------------------------------------|--------|--------|---------------------------|----|----|----|
| <b>Central America and Caribbean</b> | Mexico | Puebla | Oriental                  | NA | NA | NA |
| <b>Central America and Caribbean</b> | Mexico | Puebla | Palmar De Bravo           | NA | NA | NA |
| <b>Central America and Caribbean</b> | Mexico | Puebla | Piactla                   | NA | NA | NA |
| <b>Central America and Caribbean</b> | Mexico | Puebla | Quecholac                 | NA | NA | NA |
| <b>Central America and Caribbean</b> | Mexico | Puebla | Rafael Lara Grajales      | NA | NA | NA |
| <b>Central America and Caribbean</b> | Mexico | Puebla | San Jose Chiapa           | NA | NA | NA |
| <b>Central America and Caribbean</b> | Mexico | Puebla | San Jose Miahuatlan       | NA | NA | NA |
| <b>Central America and Caribbean</b> | Mexico | Puebla | San Juan Atenco           | NA | NA | NA |
| <b>Central America and Caribbean</b> | Mexico | Puebla | San Juan Atzompa          | NA | NA | NA |
| <b>Central America and Caribbean</b> | Mexico | Puebla | San Miguel Ixitlan        | NA | NA | NA |
| <b>Central America and Caribbean</b> | Mexico | Puebla | San Nicolas Buenos Aires  | NA | NA | NA |
| <b>Central America and Caribbean</b> | Mexico | Puebla | San Salvador El Seco      | NA | NA | NA |
| <b>Central America and Caribbean</b> | Mexico | Puebla | San Sebastian Tlacotepec  | NA | NA | NA |
| <b>Central America and Caribbean</b> | Mexico | Puebla | Santa Catarina Tlaltēmpān | NA | NA | NA |
| <b>Central America and Caribbean</b> | Mexico | Puebla | Santiago Miahuatlan       | NA | NA | NA |

|                                      |        |        |                             |    |    |    |
|--------------------------------------|--------|--------|-----------------------------|----|----|----|
| <b>Central America and Caribbean</b> | Mexico | Puebla | Soltepec                    | NA | NA | NA |
| <b>Central America and Caribbean</b> | Mexico | Puebla | Tecali De Herrera           | NA | NA | NA |
| <b>Central America and Caribbean</b> | Mexico | Puebla | Tecamachalco                | NA | NA | NA |
| <b>Central America and Caribbean</b> | Mexico | Puebla | Tehuacan                    | NA | NA | NA |
| <b>Central America and Caribbean</b> | Mexico | Puebla | Tehuizingo                  | NA | NA | NA |
| <b>Central America and Caribbean</b> | Mexico | Puebla | Teopantlan                  | NA | NA | NA |
| <b>Central America and Caribbean</b> | Mexico | Puebla | Tepanco De Lopez            | NA | NA | NA |
| <b>Central America and Caribbean</b> | Mexico | Puebla | Tlachichuca                 | NA | NA | NA |
| <b>Central America and Caribbean</b> | Mexico | Puebla | Tlacotepec De Benito Juarez | NA | NA | NA |
| <b>Central America and Caribbean</b> | Mexico | Puebla | Tochtepec                   | NA | NA | NA |
| <b>Central America and Caribbean</b> | Mexico | Puebla | Vicente Guerrero            | NA | NA | NA |
| <b>Central America and Caribbean</b> | Mexico | Puebla | Xochitlan Todos Santos      | NA | NA | NA |
| <b>Central America and Caribbean</b> | Mexico | Puebla | Yehualtepec                 | NA | NA | NA |
| <b>Central America and Caribbean</b> | Mexico | Puebla | Zacapala                    | NA | NA | NA |
| <b>Central America and Caribbean</b> | Mexico | Puebla | Zapotitlan                  | NA | NA | NA |

|                                      |        |           |                     |    |    |    |
|--------------------------------------|--------|-----------|---------------------|----|----|----|
| <b>Central America and Caribbean</b> | Mexico | Puebla    | Zoquitlan           | NA | NA | NA |
| <b>Central America and Caribbean</b> | Mexico | Querétaro | NA                  | NA | NA | NA |
| <b>Central America and Caribbean</b> | Mexico | Querétaro | Amealco De Bonfil   | NA | NA | NA |
| <b>Central America and Caribbean</b> | Mexico | Querétaro | Arroyo Seco         | NA | NA | NA |
| <b>Central America and Caribbean</b> | Mexico | Querétaro | Cadereyta De Montes | NA | NA | NA |
| <b>Central America and Caribbean</b> | Mexico | Querétaro | Colon               | NA | NA | NA |
| <b>Central America and Caribbean</b> | Mexico | Querétaro | Corregidora         | NA | NA | NA |
| <b>Central America and Caribbean</b> | Mexico | Querétaro | El Marques          | NA | NA | NA |
| <b>Central America and Caribbean</b> | Mexico | Querétaro | Ezequiel Montes     | NA | NA | NA |
| <b>Central America and Caribbean</b> | Mexico | Querétaro | Huimilpan           | NA | NA | NA |
| <b>Central America and Caribbean</b> | Mexico | Querétaro | Jalpan De Serra     | NA | NA | NA |
| <b>Central America and Caribbean</b> | Mexico | Querétaro | Landa De Matamoros  | NA | NA | NA |
| <b>Central America and Caribbean</b> | Mexico | Querétaro | Pedro Escobedo      | NA | NA | NA |
| <b>Central America and Caribbean</b> | Mexico | Querétaro | Penamiller          | NA | NA | NA |
| <b>Central America and Caribbean</b> | Mexico | Querétaro | Pinal De Amoles     | NA | NA | NA |

|                                      |        |                      |                       |    |    |    |
|--------------------------------------|--------|----------------------|-----------------------|----|----|----|
| <b>Central America and Caribbean</b> | Mexico | Querétaro<br>Arteaga | Queretaro             | NA | NA | NA |
| <b>Central America and Caribbean</b> | Mexico | Querétaro<br>Arteaga | San Joaquin           | NA | NA | NA |
| <b>Central America and Caribbean</b> | Mexico | Querétaro<br>Arteaga | San Juan Del Rio      | NA | NA | NA |
| <b>Central America and Caribbean</b> | Mexico | Querétaro<br>Arteaga | Tequisquiapan         | NA | NA | NA |
| <b>Central America and Caribbean</b> | Mexico | Querétaro<br>Arteaga | Tolimán               | NA | NA | NA |
| <b>Central America and Caribbean</b> | Mexico | San Luis Potosí      | NA                    | NA | NA | NA |
| <b>Central America and Caribbean</b> | Mexico | San Luis Potosí      | Catorce               | NA | NA | NA |
| <b>Central America and Caribbean</b> | Mexico | San Luis Potosí      | Cedral                | NA | NA | NA |
| <b>Central America and Caribbean</b> | Mexico | San Luis Potosí      | Cerritos              | NA | NA | NA |
| <b>Central America and Caribbean</b> | Mexico | San Luis Potosí      | Charcas               | NA | NA | NA |
| <b>Central America and Caribbean</b> | Mexico | San Luis Potosí      | Guadalcazar           | NA | NA | NA |
| <b>Central America and Caribbean</b> | Mexico | San Luis Potosí      | Matehuala             | NA | NA | NA |
| <b>Central America and Caribbean</b> | Mexico | San Luis Potosí      | Moctezuma             | NA | NA | NA |
| <b>Central America and Caribbean</b> | Mexico | San Luis Potosí      | San Nicolas Tolentino | NA | NA | NA |
| <b>Central America and Caribbean</b> | Mexico | San Luis Potosí      | Santa Maria Del Rio   | NA | NA | NA |

|                                      |        |                 |                    |    |    |    |
|--------------------------------------|--------|-----------------|--------------------|----|----|----|
| <b>Central America and Caribbean</b> | Mexico | San Luis Potosí | Santo Domingo      | NA | NA | NA |
| <b>Central America and Caribbean</b> | Mexico | San Luis Potosí | Vanegas            | NA | NA | NA |
| <b>Central America and Caribbean</b> | Mexico | San Luis Potosí | Villa De Arriaga   | NA | NA | NA |
| <b>Central America and Caribbean</b> | Mexico | San Luis Potosí | Villa De Guadalupe | NA | NA | NA |
| <b>Central America and Caribbean</b> | Mexico | San Luis Potosí | Villa De La Paz    | NA | NA | NA |
| <b>Central America and Caribbean</b> | Mexico | San Luis Potosí | Villa De Reyes     | NA | NA | NA |
| <b>Central America and Caribbean</b> | Mexico | San Luis Potosí | Villa Hidalgo      | NA | NA | NA |
| <b>Central America and Caribbean</b> | Mexico | San Luis Potosí | Villa Juarez       | NA | NA | NA |
| <b>Central America and Caribbean</b> | Mexico | Sinaloa         | Ahome              | NA | NA | NA |
| <b>Central America and Caribbean</b> | Mexico | Sinaloa         | Angostura          | NA | NA | NA |
| <b>Central America and Caribbean</b> | Mexico | Sinaloa         | Badiraguato        | NA | NA | NA |
| <b>Central America and Caribbean</b> | Mexico | Sinaloa         | Choix              | NA | NA | NA |
| <b>Central America and Caribbean</b> | Mexico | Sinaloa         | Culiacan           | NA | NA | NA |
| <b>Central America and Caribbean</b> | Mexico | Sinaloa         | El Fuerte          | NA | NA | NA |
| <b>Central America and Caribbean</b> | Mexico | Sinaloa         | Elota              | NA | NA | NA |



|                                      |        |            |                   |    |    |    |
|--------------------------------------|--------|------------|-------------------|----|----|----|
| <b>Central America and Caribbean</b> | Mexico | Sinaloa    | Guasave           | NA | NA | NA |
| <b>Central America and Caribbean</b> | Mexico | Sinaloa    | Mocorito          | NA | NA | NA |
| <b>Central America and Caribbean</b> | Mexico | Sinaloa    | Salvador Alvarado | NA | NA | NA |
| <b>Central America and Caribbean</b> | Mexico | Sinaloa    | Sinaloa           | NA | NA | NA |
| <b>Central America and Caribbean</b> | Mexico | Sonora     | Agua Prieta       | NA | NA | NA |
| <b>Central America and Caribbean</b> | Mexico | Tamaulipas | Abasolo           | NA | NA | NA |
| <b>Central America and Caribbean</b> | Mexico | Tamaulipas | Burgos            | NA | NA | NA |
| <b>Central America and Caribbean</b> | Mexico | Tamaulipas | Bustamante        | NA | NA | NA |
| <b>Central America and Caribbean</b> | Mexico | Tamaulipas | Casas             | NA | NA | NA |
| <b>Central America and Caribbean</b> | Mexico | Tamaulipas | Cruillas          | NA | NA | NA |
| <b>Central America and Caribbean</b> | Mexico | Tamaulipas | Guemez            | NA | NA | NA |
| <b>Central America and Caribbean</b> | Mexico | Tamaulipas | Hidalgo           | NA | NA | NA |
| <b>Central America and Caribbean</b> | Mexico | Tamaulipas | Jaumave           | NA | NA | NA |
| <b>Central America and Caribbean</b> | Mexico | Tamaulipas | Mainero           | NA | NA | NA |
| <b>Central America and Caribbean</b> | Mexico | Tamaulipas | Miquihuana        | NA | NA | NA |

|                                      |        |                                 |                |    |    |    |
|--------------------------------------|--------|---------------------------------|----------------|----|----|----|
| <b>Central America and Caribbean</b> | Mexico | Tamaulipas                      | Padilla        | NA | NA | NA |
| <b>Central America and Caribbean</b> | Mexico | Tamaulipas                      | San Carlos     | NA | NA | NA |
| <b>Central America and Caribbean</b> | Mexico | Tamaulipas                      | San Fernando   | NA | NA | NA |
| <b>Central America and Caribbean</b> | Mexico | Tamaulipas                      | San Nicolas    | NA | NA | NA |
| <b>Central America and Caribbean</b> | Mexico | Tamaulipas                      | Soto La Marina | NA | NA | NA |
| <b>Central America and Caribbean</b> | Mexico | Tamaulipas                      | Victoria       | NA | NA | NA |
| <b>Central America and Caribbean</b> | Mexico | Tamaulipas                      | Villagran      | NA | NA | NA |
| <b>Central America and Caribbean</b> | Mexico | Veracruz De Ignacio De La Llave | Acultzingo     | NA | NA | NA |
| <b>Central America and Caribbean</b> | Mexico | Veracruz De Ignacio De La Llave | Cordoba        | NA | NA | NA |
| <b>Central America and Caribbean</b> | Mexico | Veracruz De Ignacio De La Llave | Rio Blanco     | NA | NA | NA |
| <b>Central America and Caribbean</b> | Mexico | Veracruz De Ignacio De La Llave | Tequila        | NA | NA | NA |
| <b>Central America and Caribbean</b> | Mexico | Yucatán                         | Cantamayec     | NA | NA | NA |
| <b>Central America and Caribbean</b> | Mexico | Yucatán                         | Chankom        | NA | NA | NA |

|                                      |        |           |                              |    |    |    |
|--------------------------------------|--------|-----------|------------------------------|----|----|----|
| <b>Central America and Caribbean</b> | Mexico | Yucatán   | Kaua                         | NA | NA | NA |
| <b>Central America and Caribbean</b> | Mexico | Yucatán   | Tekax                        | NA | NA | NA |
| <b>Central America and Caribbean</b> | Mexico | Yucatán   | Yaxcaba                      | NA | NA | NA |
| <b>Central America and Caribbean</b> | Mexico | Zacatecas | NA                           | NA | NA | NA |
| <b>Central America and Caribbean</b> | Mexico | Zacatecas | Apozol                       | NA | NA | NA |
| <b>Central America and Caribbean</b> | Mexico | Zacatecas | Apulco                       | NA | NA | NA |
| <b>Central America and Caribbean</b> | Mexico | Zacatecas | Atolinga                     | NA | NA | NA |
| <b>Central America and Caribbean</b> | Mexico | Zacatecas | Benito Juarez                | NA | NA | NA |
| <b>Central America and Caribbean</b> | Mexico | Zacatecas | Calera                       | NA | NA | NA |
| <b>Central America and Caribbean</b> | Mexico | Zacatecas | Canitas De Felipe Pescador   | NA | NA | NA |
| <b>Central America and Caribbean</b> | Mexico | Zacatecas | Concepcion Del Oro           | NA | NA | NA |
| <b>Central America and Caribbean</b> | Mexico | Zacatecas | Cuauhtemoc                   | NA | NA | NA |
| <b>Central America and Caribbean</b> | Mexico | Zacatecas | El Plateado De Joaquin Amaro | NA | NA | NA |
| <b>Central America and Caribbean</b> | Mexico | Zacatecas | El Salvador                  | NA | NA | NA |
| <b>Central America and Caribbean</b> | Mexico | Zacatecas | Genaro Codina                | NA | NA | NA |

|                                      |        |           |                              |    |    |    |
|--------------------------------------|--------|-----------|------------------------------|----|----|----|
| <b>Central America and Caribbean</b> | Mexico | Zacatecas | General Enrique Estrada      | NA | NA | NA |
| <b>Central America and Caribbean</b> | Mexico | Zacatecas | General Francisco R. Murguia | NA | NA | NA |
| <b>Central America and Caribbean</b> | Mexico | Zacatecas | Huanusco                     | NA | NA | NA |
| <b>Central America and Caribbean</b> | Mexico | Zacatecas | Jalpa                        | NA | NA | NA |
| <b>Central America and Caribbean</b> | Mexico | Zacatecas | Juan Aldama                  | NA | NA | NA |
| <b>Central America and Caribbean</b> | Mexico | Zacatecas | Luis Moya                    | NA | NA | NA |
| <b>Central America and Caribbean</b> | Mexico | Zacatecas | Mazapil                      | NA | NA | NA |
| <b>Central America and Caribbean</b> | Mexico | Zacatecas | Melchor Ocampo               | NA | NA | NA |
| <b>Central America and Caribbean</b> | Mexico | Zacatecas | Mezquital Del Oro            | NA | NA | NA |
| <b>Central America and Caribbean</b> | Mexico | Zacatecas | Miguel Auza                  | NA | NA | NA |
| <b>Central America and Caribbean</b> | Mexico | Zacatecas | Momax                        | NA | NA | NA |
| <b>Central America and Caribbean</b> | Mexico | Zacatecas | Monte Escobedo               | NA | NA | NA |
| <b>Central America and Caribbean</b> | Mexico | Zacatecas | Moyahua De Estrada           | NA | NA | NA |
| <b>Central America and Caribbean</b> | Mexico | Zacatecas | Nochistlan De Mejia          | NA | NA | NA |
| <b>Central America and Caribbean</b> | Mexico | Zacatecas | Pinos                        | NA | NA | NA |

|                                      |             |            |                         |             |                  |               |
|--------------------------------------|-------------|------------|-------------------------|-------------|------------------|---------------|
| <b>Central America and Caribbean</b> | Mexico      | Zacatecas  | Rio Grande              | NA          | NA               | NA            |
| <b>Central America and Caribbean</b> | Mexico      | Zacatecas  | Sain Alto               | NA          | NA               | NA            |
| <b>Central America and Caribbean</b> | Mexico      | Zacatecas  | Tabasco                 | NA          | NA               | NA            |
| <b>Central America and Caribbean</b> | Mexico      | Zacatecas  | Tepechitlan             | NA          | NA               | NA            |
| <b>Central America and Caribbean</b> | Mexico      | Zacatecas  | Teul De Gonzalez Ortega | NA          | NA               | NA            |
| <b>Central America and Caribbean</b> | Mexico      | Zacatecas  | Villa De Cos            | NA          | NA               | NA            |
| <b>Central America and Caribbean</b> | Mexico      | Zacatecas  | Villa Garcia            | NA          | NA               | NA            |
| <b>Central Asia</b>                  | Afghanistan | Badakhshan | Wakhan                  | Afghanistan | Badakhshan       | Eshkmesh      |
| <b>NA</b>                            | NA          | NA         | NA                      | Afghanistan | Badakhshan       | Shighnan      |
| <b>NA</b>                            | NA          | NA         | NA                      | Afghanistan | Badakhshan       | Shuhada       |
| <b>NA</b>                            | NA          | NA         | NA                      | Afghanistan | Badakhshan       | Wakhan        |
| <b>NA</b>                            | NA          | NA         | NA                      | Afghanistan | Nuristan         | Barg-e- Matal |
| <b>NA</b>                            | NA          | NA         | NA                      | Afghanistan | Nuristan         | Kamdesh       |
| <b>NA</b>                            | NA          | NA         | NA                      | Tajikistan  | Gorno-Badakhshan | Ishkoshim     |
| <b>East Asia</b>                     | China       | NA         | NA                      | China       | NA               | NA            |
| <b>East Asia</b>                     | China       | Anhui      | Chuzhou                 | China       | Anhui            | NA            |
| <b>East Asia</b>                     | China       | Fujian     | NA                      | China       | Chongqing        | NA            |
| <b>East Asia</b>                     | China       | Fujian     | Longyan                 | China       | Chongqing        | Chongqing     |
| <b>East Asia</b>                     | China       | Fujian     | Quanzhou                | China       | Fujian           | NA            |
| <b>East Asia</b>                     | China       | Fujian     | Xiamen                  | China       | Gansu            | NA            |
| <b>East Asia</b>                     | China       | Gansu      | Jiuquan                 | China       | Gansu            | Jiuquan       |
| <b>East Asia</b>                     | China       | Guangdong  | NA                      | China       | Guangdong        | NA            |

|                  |       |             |                          |       |             |                          |
|------------------|-------|-------------|--------------------------|-------|-------------|--------------------------|
| <b>East Asia</b> | China | Guangdong   | Maoming                  | China | Guangdong   | Zhanjiang                |
| <b>East Asia</b> | China | Guangdong   | Yangjiang                | China | Guangxi     | NA                       |
| <b>East Asia</b> | China | Guangdong   | Zhanjiang                | China | Guangxi     | Beihai                   |
| <b>East Asia</b> | China | Guangxi     | Beihai                   | China | Guangxi     | Fangchenggang            |
| <b>East Asia</b> | China | Henan       | NA                       | China | Guizhou     | NA                       |
| <b>East Asia</b> | China | Jiangsu     | Huai'an                  | China | Henan       | NA                       |
| <b>East Asia</b> | China | Jiangsu     | Lianyungang              | China | Hunan       | NA                       |
| <b>East Asia</b> | China | Jiangsu     | Nanjing                  | China | Jiangsu     | Huai'an                  |
| <b>East Asia</b> | China | Jiangsu     | Suqian                   | China | Jiangsu     | Lianyungang              |
| <b>East Asia</b> | China | Jiangsu     | Yangzhou                 | China | Jiangsu     | Suqian                   |
| <b>East Asia</b> | China | Jiangxi     | NA                       | China | Jiangsu     | Xuzhou                   |
| <b>East Asia</b> | China | Jiangxi     | Ganzhou                  | China | Jiangxi     | NA                       |
| <b>East Asia</b> | China | Jiangxi     | Yingtian                 | China | Jiangxi     | Ganzhou                  |
| <b>East Asia</b> | China | Nei Mongol  | NA                       | China | Jiangxi     | Shangrao                 |
| <b>East Asia</b> | China | Nei Mongol  | Alxa                     | China | Nei Mongol  | NA                       |
| <b>East Asia</b> | China | Nei Mongol  | Baotou                   | China | Nei Mongol  | Alxa                     |
| <b>East Asia</b> | China | Nei Mongol  | Hulunbuir                | China | Nei Mongol  | Baotou                   |
| <b>East Asia</b> | China | Nei Mongol  | Tongliao                 | China | Nei Mongol  | Hohhot                   |
| <b>East Asia</b> | China | Nei Mongol  | Wuhai                    | China | Nei Mongol  | Hulunbuir                |
| <b>East Asia</b> | China | Nei Mongol  | Xilin Gol                | China | Nei Mongol  | Tongliao                 |
| <b>East Asia</b> | China | Nei Mongol  | Xing'an                  | China | Nei Mongol  | Wuhai                    |
| <b>East Asia</b> | China | Ningxia Hui | NA                       | China | Nei Mongol  | Xilin Gol                |
| <b>East Asia</b> | China | Ningxia Hui | Shizuishan               | China | Nei Mongol  | Xing'an                  |
| <b>East Asia</b> | China | Ningxia Hui | Yinchuan                 | China | Ningxia Hui | NA                       |
| <b>East Asia</b> | China | Qinghai     | Gyêgu Tibetan            | China | Qinghai     | Golog Tibetan            |
| <b>East Asia</b> | China | Qinghai     | Haixi Mongol and Tibetan | China | Qinghai     | Gyêgu Tibetan            |
| <b>East Asia</b> | China | Shandong    | NA                       | China | Qinghai     | Haixi Mongol and Tibetan |

|                  |       |          |                    |       |          |                         |
|------------------|-------|----------|--------------------|-------|----------|-------------------------|
| <b>East Asia</b> | China | Shandong | Linyi              | China | Shandong | NA                      |
| <b>East Asia</b> | China | Shandong | Qingdao            | China | Shanxi   | NA                      |
| <b>East Asia</b> | China | Shandong | Rizhao             | China | Sichuan  | NA                      |
| <b>East Asia</b> | China | Shandong | Weihai             | China | Sichuan  | Garzê Tibetan           |
| <b>East Asia</b> | China | Shandong | Yantai             | China | Sichuan  | Liangshan Yi            |
| <b>East Asia</b> | China | Sichuan  | Garzê Tibetan      | China | Sichuan  | Ngawa Tibetan and Qiang |
| <b>East Asia</b> | China | Sichuan  | Panzhihua          | China | Sichuan  | Panzhihua               |
| <b>East Asia</b> | China | Xinjiang | NA                 | China | Xinjiang | NA                      |
| <b>East Asia</b> | China | Xinjiang | Khotan             | China | Xinjiang | Khotan                  |
| <b>East Asia</b> | China | Xizang   | Chamdo             | China | Xizang   | Chamdo                  |
| <b>East Asia</b> | China | Xizang   | Ngari              | China | Xizang   | Ngari                   |
| <b>East Asia</b> | China | Yunnan   | NA                 | China | Yunnan   | NA                      |
| <b>East Asia</b> | China | Yunnan   | Chuxiong Yi        | China | Yunnan   | Baoshan                 |
| <b>East Asia</b> | China | Yunnan   | Honghe Hani and Yi | China | Yunnan   | Dali Bai                |
| <b>East Asia</b> | China | Yunnan   | Kunming            | China | Yunnan   | Dehong Dai and Jingpo   |
| <b>East Asia</b> | China | Yunnan   | Xishuangbanna Dai  | China | Yunnan   | Honghe Hani and Yi      |
| <b>East Asia</b> | China | Zhejiang | Lishui             | China | Yunnan   | Kunming                 |
| <b>East Asia</b> | China | Zhejiang | Quzhou             | China | Yunnan   | Lijiang                 |
| <b>East Asia</b> | China | Zhejiang | Wenzhou            | China | Yunnan   | Lincang                 |
| <b>East Asia</b> | China | Zhejiang | Zhoushan           | China | Yunnan   | Nujiang Lisu            |
| <b>NA</b>        | NA    | NA       | NA                 | China | Yunnan   | Pu'er                   |
| <b>NA</b>        | NA    | NA       | NA                 | China | Yunnan   | Xishuangbanna Dai       |
| <b>NA</b>        | NA    | NA       | NA                 | China | Zhejiang | Lishui                  |
| <b>NA</b>        | NA    | NA       | NA                 | China | Zhejiang | Quzhou                  |
| <b>NA</b>        | NA    | NA       | NA                 | China | Zhejiang | Wenzhou                 |

|                                   |          |                 |              |          |                   |               |
|-----------------------------------|----------|-----------------|--------------|----------|-------------------|---------------|
| <b>NA</b>                         | NA       | NA              | NA           | China    | Zhejiang          | Zhoushan      |
| <b>Eastern sub-Saharan Africa</b> | Burundi  | Bujumbura Rural | Mugongomanga | Burundi  | Bujumbura Rural   | Mugongomanga  |
| <b>Eastern sub-Saharan Africa</b> | Burundi  | Bujumbura Rural | Mukike       | Burundi  | Bujumbura Rural   | Mukike        |
| <b>Eastern sub-Saharan Africa</b> | Burundi  | Bururi          | Bururi       | Burundi  | Bururi            | Matana        |
| <b>Eastern sub-Saharan Africa</b> | Burundi  | Bururi          | Matana       | Burundi  | Bururi            | Mugamba       |
| <b>Eastern sub-Saharan Africa</b> | Burundi  | Bururi          | Mugamba      | Burundi  | Bururi            | Songa         |
| <b>Eastern sub-Saharan Africa</b> | Burundi  | Bururi          | Rutovu       | Burundi  | Mwaro             | Bisoro        |
| <b>Eastern sub-Saharan Africa</b> | Burundi  | Bururi          | Songa        | Burundi  | Mwaro             | Gisozi        |
| <b>Eastern sub-Saharan Africa</b> | Burundi  | Gitega          | Ryansoro     | Burundi  | Mwaro             | Rusaka        |
| <b>Eastern sub-Saharan Africa</b> | Burundi  | Muramvya        | Muramvya     | Ethiopia | Amhara            | NA            |
| <b>Eastern sub-Saharan Africa</b> | Burundi  | Mwaro           | NA           | Ethiopia | Amhara            | Debub Gondar  |
| <b>Eastern sub-Saharan Africa</b> | Burundi  | Mwaro           | Bisoro       | Ethiopia | Amhara            | Mirab Gojjam  |
| <b>Eastern sub-Saharan Africa</b> | Burundi  | Mwaro           | Gisozi       | Ethiopia | Amhara            | Misraq Gojjam |
| <b>Eastern sub-Saharan Africa</b> | Burundi  | Mwaro           | Kayokwe      | Ethiopia | Gambela Peoples   | Majang        |
| <b>Eastern sub-Saharan Africa</b> | Burundi  | Mwaro           | Rusaka       | Ethiopia | Oromia            | North Shewa   |
| <b>Eastern sub-Saharan Africa</b> | Ethiopia | Gambela Peoples | Majang       | Ethiopia | Southern Nations, | Bench Maji    |



|                                   |          |                                             |                |          |                                             |              |
|-----------------------------------|----------|---------------------------------------------|----------------|----------|---------------------------------------------|--------------|
|                                   |          |                                             |                |          | Nationalities and Peoples                   |              |
| <b>Eastern sub-Saharan Africa</b> | Ethiopia | Oromia                                      | North Shewa    | Ethiopia | Southern Nations, Nationalities and Peoples | Dawro        |
| <b>Eastern sub-Saharan Africa</b> | Ethiopia | Southern Nations, Nationalities and Peoples | Keffa          | Ethiopia | Southern Nations, Nationalities and Peoples | Keffa        |
| <b>Eastern sub-Saharan Africa</b> | Kenya    | Bungoma                                     | Kimilili       | Ethiopia | Southern Nations, Nationalities and Peoples | Konta        |
| <b>Eastern sub-Saharan Africa</b> | Kenya    | Bungoma                                     | Mt. Elgon      | Ethiopia | Southern Nations, Nationalities and Peoples | Sheka        |
| <b>Eastern sub-Saharan Africa</b> | Kenya    | Bungoma                                     | Tongaren       | Ethiopia | Tigray                                      | Mehakelegnaw |
| <b>Eastern sub-Saharan Africa</b> | Kenya    | Kericho                                     | Bureti         | Kenya    | Bungoma                                     | NA           |
| <b>Eastern sub-Saharan Africa</b> | Kenya    | Kericho                                     | Kipkelion East | Kenya    | Bungoma                                     | Kabuchai     |
| <b>Eastern sub-Saharan Africa</b> | Kenya    | Nakuru                                      | Kuresoi North  | Kenya    | Bungoma                                     | Kimilili     |
| <b>Eastern sub-Saharan Africa</b> | Kenya    | Nakuru                                      | Kuresoi South  | Kenya    | Bungoma                                     | Lugari       |
| <b>Eastern sub-Saharan Africa</b> | Kenya    | Nakuru                                      | Molo           | Kenya    | Bungoma                                     | Mt. Elgon    |

|                                   |        |                |             |        |              |             |
|-----------------------------------|--------|----------------|-------------|--------|--------------|-------------|
| <b>Eastern sub-Saharan Africa</b> | Kenya  | Nyandarua      | OI Jorok    | Kenya  | Bungoma      | Sirisia     |
| <b>Eastern sub-Saharan Africa</b> | Kenya  | Trans Nzoia    | NA          | Kenya  | Bungoma      | Tongaren    |
| <b>Eastern sub-Saharan Africa</b> | Kenya  | Trans Nzoia    | Endebess    | Kenya  | Busia        | Teso North  |
| <b>Eastern sub-Saharan Africa</b> | Kenya  | Trans Nzoia    | Kiminini    | Kenya  | Trans Nzoia  | NA          |
| <b>Eastern sub-Saharan Africa</b> | Kenya  | Trans Nzoia    | Saboti      | Kenya  | Trans Nzoia  | Endebess    |
| <b>Eastern sub-Saharan Africa</b> | Kenya  | Trans Nzoia    | unknown 4   | Kenya  | Trans Nzoia  | Kwanza      |
| <b>Eastern sub-Saharan Africa</b> | Kenya  | West Pokot     | Pokot South | Kenya  | Trans Nzoia  | Saboti      |
| <b>Eastern sub-Saharan Africa</b> | Rwanda | Amajyaruguru   | NA          | Kenya  | Trans Nzoia  | unknown 4   |
| <b>Eastern sub-Saharan Africa</b> | Rwanda | Amajyaruguru   | Burera      | Kenya  | West Pokot   | Kapenguria  |
| <b>Eastern sub-Saharan Africa</b> | Rwanda | Amajyaruguru   | Gakenke     | Kenya  | West Pokot   | Pokot South |
| <b>Eastern sub-Saharan Africa</b> | Rwanda | Amajyaruguru   | Gicumbi     | Rwanda | Amajyaruguru | NA          |
| <b>Eastern sub-Saharan Africa</b> | Rwanda | Amajyaruguru   | Musanze     | Rwanda | Amajyaruguru | Burera      |
| <b>Eastern sub-Saharan Africa</b> | Rwanda | Amajyaruguru   | Rulindo     | Rwanda | Amajyaruguru | Gakenke     |
| <b>Eastern sub-Saharan Africa</b> | Rwanda | Amajyepfo      | Muhanga     | Rwanda | Amajyaruguru | Gicumbi     |
| <b>Eastern sub-Saharan Africa</b> | Rwanda | Iburengerazuba | NA          | Rwanda | Amajyaruguru | Musanze     |

|                                   |        |                |                     |          |                  |                     |
|-----------------------------------|--------|----------------|---------------------|----------|------------------|---------------------|
| <b>Eastern sub-Saharan Africa</b> | Rwanda | Iburengerazuba | Ngororero           | Rwanda   | Amajyaruguru     | Rulindo             |
| <b>Eastern sub-Saharan Africa</b> | Rwanda | Iburengerazuba | Nyabihu             | Rwanda   | Amajyepfo        | Kamonyi             |
| <b>Eastern sub-Saharan Africa</b> | Rwanda | Iburengerazuba | Rubavu              | Rwanda   | Amajyepfo        | Muhanga             |
| <b>Eastern sub-Saharan Africa</b> | Rwanda | Iburengerazuba | Rutsiro             | Rwanda   | Iburengerazuba   | NA                  |
| <b>Eastern sub-Saharan Africa</b> | Uganda | Kabale         | NA                  | Rwanda   | Iburengerazuba   | Karongi             |
| <b>Eastern sub-Saharan Africa</b> | Uganda | Kabale         | Kabale Municipality | Rwanda   | Iburengerazuba   | Ngororero           |
| <b>Eastern sub-Saharan Africa</b> | Uganda | Kabale         | Ndorwa              | Rwanda   | Iburengerazuba   | Nyabihu             |
| <b>Eastern sub-Saharan Africa</b> | Uganda | Kisoro         | NA                  | Rwanda   | Iburengerazuba   | Rubavu              |
| <b>Eastern sub-Saharan Africa</b> | Uganda | Kisoro         | Bufumbira           | Rwanda   | Iburengerazuba   | Rutsiro             |
| <b>Eastern sub-Saharan Africa</b> | Uganda | Kisoro         | Kisoro Municipality | Rwanda   | Umujyi wa Kigali | NA                  |
| <b>Eastern sub-Saharan Africa</b> | Uganda | Rubanda        | NA                  | Rwanda   | Umujyi wa Kigali | Gasabo              |
| <b>Eastern sub-Saharan Africa</b> | Uganda | Rubanda        | Rubanda             | Tanzania | Dodoma           | Chamwino            |
| <b>Eastern sub-Saharan Africa</b> | Uganda | Rukiga         | NA                  | Tanzania | Mbeya            | Mbeya Rural         |
| <b>Eastern sub-Saharan Africa</b> | Uganda | Rukiga         | Rukiga              | Tanzania | Singida          | Singida Rural       |
| <b>NA</b>                         | NA     | NA             | NA                  | Uganda   | Kabale           | NA                  |
| <b>NA</b>                         | NA     | NA             | NA                  | Uganda   | Kabale           | Kabale Municipality |

|                    |      |         |             |        |           |                     |
|--------------------|------|---------|-------------|--------|-----------|---------------------|
| NA                 | NA   | NA      | NA          | Uganda | Kabale    | Ndorwa              |
| NA                 | NA   | NA      | NA          | Uganda | Kisoro    | NA                  |
| NA                 | NA   | NA      | NA          | Uganda | Kisoro    | Bufumbira           |
| NA                 | NA   | NA      | NA          | Uganda | Kisoro    | Kisoro Municipality |
| NA                 | NA   | NA      | NA          | Uganda | Mbarara   | NA                  |
| NA                 | NA   | NA      | NA          | Uganda | Mbarara   | Rwampara            |
| NA                 | NA   | NA      | NA          | Uganda | Ntungamo  | NA                  |
| NA                 | NA   | NA      | NA          | Uganda | Ntungamo  | Kajara              |
| NA                 | NA   | NA      | NA          | Uganda | Ntungamo  | Ruhaama             |
| NA                 | NA   | NA      | NA          | Uganda | Ntungamo  | Rushenyi            |
| NA                 | NA   | NA      | NA          | Uganda | Rubanda   | NA                  |
| NA                 | NA   | NA      | NA          | Uganda | Rubanda   | Rubanda             |
| NA                 | NA   | NA      | NA          | Uganda | Rukiga    | NA                  |
| NA                 | NA   | NA      | NA          | Uganda | Rukiga    | Rukiga              |
| NA                 | NA   | NA      | NA          | Uganda | Rukungiri | NA                  |
| NA                 | NA   | NA      | NA          | Uganda | Rukungiri | Rubabo              |
| <b>Middle East</b> | Iran | NA      | NA          | Iran   | NA        | NA                  |
| <b>Middle East</b> | Iran | Alborz  | NA          | Iran   | Alborz    | NA                  |
| <b>Middle East</b> | Iran | Alborz  | Karaj       | Iran   | Alborz    | Karaj               |
| <b>Middle East</b> | Iran | Alborz  | Nazarabad   | Iran   | Alborz    | Nazarabad           |
| <b>Middle East</b> | Iran | Alborz  | Savojbalagh | Iran   | Alborz    | Savojbalagh         |
| <b>Middle East</b> | Iran | Alborz  | Taleghan    | Iran   | Alborz    | Taleghan            |
| <b>Middle East</b> | Iran | Ardebil | NA          | Iran   | Ardebil   | NA                  |
| <b>Middle East</b> | Iran | Ardebil | Ardebil     | Iran   | Ardebil   | Ardebil             |
| <b>Middle East</b> | Iran | Ardebil | Bilehsavar  | Iran   | Ardebil   | Meshkinshah         |
| <b>Middle East</b> | Iran | Ardebil | Garmi       | Iran   | Ardebil   | Namin               |
| <b>Middle East</b> | Iran | Ardebil | Khalkhal    | Iran   | Ardebil   | Nayer               |
| <b>Middle East</b> | Iran | Ardebil | Kowsar      | Iran   | Ardebil   | Sareyn              |

|                    |      |                          |             |      |                          |              |
|--------------------|------|--------------------------|-------------|------|--------------------------|--------------|
| <b>Middle East</b> | Iran | Ardebil                  | Meshkinshah | Iran | Bushehr                  | NA           |
| <b>Middle East</b> | Iran | Ardebil                  | Namin       | Iran | Bushehr                  | Bushehr      |
| <b>Middle East</b> | Iran | Ardebil                  | Nayer       | Iran | Bushehr                  | Dashtestan   |
| <b>Middle East</b> | Iran | Ardebil                  | Sareyn      | Iran | Bushehr                  | Dayyer       |
| <b>Middle East</b> | Iran | Bushehr                  | NA          | Iran | Bushehr                  | Deylam       |
| <b>Middle East</b> | Iran | Bushehr                  | Bushehr     | Iran | Bushehr                  | Genaveh      |
| <b>Middle East</b> | Iran | Bushehr                  | Dashtestan  | Iran | Bushehr                  | Tangestan    |
| <b>Middle East</b> | Iran | Bushehr                  | Dashti      | Iran | Chaharmahal & Bakhtiyari | NA           |
| <b>Middle East</b> | Iran | Bushehr                  | Dayyer      | Iran | Chaharmahal & Bakhtiyari | Ardal        |
| <b>Middle East</b> | Iran | Bushehr                  | Deylam      | Iran | Chaharmahal & Bakhtiyari | Borujen      |
| <b>Middle East</b> | Iran | Bushehr                  | Genaveh     | Iran | Chaharmahal & Bakhtiyari | Lordegan     |
| <b>Middle East</b> | Iran | Bushehr                  | Tangestan   | Iran | Chaharmahal & Bakhtiyari | Shahr-e-Kord |
| <b>Middle East</b> | Iran | Chaharmahal & Bakhtiyari | NA          | Iran | East Azarbayejan         | NA           |
| <b>Middle East</b> | Iran | Chaharmahal & Bakhtiyari | Ardal       | Iran | East Azarbayejan         | Ahar         |
| <b>Middle East</b> | Iran | Chaharmahal & Bakhtiyari | Borujen     | Iran | East Azarbayejan         | Ajabshir     |
| <b>Middle East</b> | Iran | Chaharmahal & Bakhtiyari | Farsan      | Iran | East Azarbayejan         | Azarshahr    |
| <b>Middle East</b> | Iran | Chaharmahal & Bakhtiyari | Keyar       | Iran | East Azarbayejan         | Bonab        |
| <b>Middle East</b> | Iran | Chaharmahal & Bakhtiyari | Kuhrang     | Iran | East Azarbayejan         | Bostanabad   |
| <b>Middle East</b> | Iran | Chaharmahal & Bakhtiyari | Lordegan    | Iran | East Azarbayejan         | Charoimaq    |

|                    |      |                          |              |      |                  |            |
|--------------------|------|--------------------------|--------------|------|------------------|------------|
| <b>Middle East</b> | Iran | Chaharmahal & Bakhtiyari | Shahr-e-Kord | Iran | East Azarbayejan | Haris      |
| <b>Middle East</b> | Iran | East Azarbayejan         | NA           | Iran | East Azarbayejan | Hashtrud   |
| <b>Middle East</b> | Iran | East Azarbayejan         | Ahar         | Iran | East Azarbayejan | Jolfa      |
| <b>Middle East</b> | Iran | East Azarbayejan         | Ajabshir     | Iran | East Azarbayejan | Kaleibar   |
| <b>Middle East</b> | Iran | East Azarbayejan         | Azarshahr    | Iran | East Azarbayejan | Malekan    |
| <b>Middle East</b> | Iran | East Azarbayejan         | Bonab        | Iran | East Azarbayejan | Maragheh   |
| <b>Middle East</b> | Iran | East Azarbayejan         | Bostanabad   | Iran | East Azarbayejan | Marand     |
| <b>Middle East</b> | Iran | East Azarbayejan         | Charoimaq    | Iran | East Azarbayejan | Miyaneh    |
| <b>Middle East</b> | Iran | East Azarbayejan         | Haris        | Iran | East Azarbayejan | Osku       |
| <b>Middle East</b> | Iran | East Azarbayejan         | Hashtrud     | Iran | East Azarbayejan | Sarab      |
| <b>Middle East</b> | Iran | East Azarbayejan         | Jolfa        | Iran | East Azarbayejan | Shabestar  |
| <b>Middle East</b> | Iran | East Azarbayejan         | Kaleibar     | Iran | East Azarbayejan | Tabriz     |
| <b>Middle East</b> | Iran | East Azarbayejan         | Malekan      | Iran | Esfahan          | NA         |
| <b>Middle East</b> | Iran | East Azarbayejan         | Maragheh     | Iran | Esfahan          | Dehaghan   |
| <b>Middle East</b> | Iran | East Azarbayejan         | Marand       | Iran | Esfahan          | Falavarjan |

|                    |      |                  |                  |      |         |                       |
|--------------------|------|------------------|------------------|------|---------|-----------------------|
| <b>Middle East</b> | Iran | East Azarbayejan | Miyaneh          | Iran | Esfahan | Isfahan               |
| <b>Middle East</b> | Iran | East Azarbayejan | Osku             | Iran | Esfahan | Kashan                |
| <b>Middle East</b> | Iran | East Azarbayejan | Sarab            | Iran | Esfahan | Mobarakeh             |
| <b>Middle East</b> | Iran | East Azarbayejan | Shabestar        | Iran | Esfahan | Shahreza              |
| <b>Middle East</b> | Iran | East Azarbayejan | Tabriz           | Iran | Fars    | Farashband            |
| <b>Middle East</b> | Iran | Esfahan          | NA               | Iran | Fars    | Gerash                |
| <b>Middle East</b> | Iran | Esfahan          | Aran & Bidgol    | Iran | Fars    | Kazerun               |
| <b>Middle East</b> | Iran | Esfahan          | Dehaghan         | Iran | Fars    | Khonj                 |
| <b>Middle East</b> | Iran | Esfahan          | Falavarjan       | Iran | Fars    | Mamasani              |
| <b>Middle East</b> | Iran | Esfahan          | Golpayegan       | Iran | Fars    | Marvdasht             |
| <b>Middle East</b> | Iran | Esfahan          | Isfahan          | Iran | Fars    | Mohr                  |
| <b>Middle East</b> | Iran | Esfahan          | Kashan           | Iran | Fars    | Rostam                |
| <b>Middle East</b> | Iran | Esfahan          | Khour& Biyabanak | Iran | Gilan   | NA                    |
| <b>Middle East</b> | Iran | Esfahan          | Lanjan           | Iran | Gilan   | Amlash                |
| <b>Middle East</b> | Iran | Esfahan          | Mobarakeh        | Iran | Gilan   | Astaneh-ye-Ashrafiyeh |
| <b>Middle East</b> | Iran | Esfahan          | Najafabad        | Iran | Gilan   | Bandar-e-Anzali       |
| <b>Middle East</b> | Iran | Esfahan          | Shahreza         | Iran | Gilan   | Fuman                 |
| <b>Middle East</b> | Iran | Fars             | Abadeh           | Iran | Gilan   | Masal                 |
| <b>Middle East</b> | Iran | Fars             | Eqlid            | Iran | Gilan   | Rasht                 |
| <b>Middle East</b> | Iran | Fars             | Farashband       | Iran | Gilan   | Rezvanshahr           |
| <b>Middle East</b> | Iran | Fars             | Gerash           | Iran | Gilan   | Rudbar                |
| <b>Middle East</b> | Iran | Fars             | Kazerun          | Iran | Gilan   | Rudsar                |
| <b>Middle East</b> | Iran | Fars             | Khonj            | Iran | Gilan   | Shaft                 |
| <b>Middle East</b> | Iran | Fars             | Lamard           | Iran | Gilan   | Siahkal               |

|                    |      |          |                       |      |           |               |
|--------------------|------|----------|-----------------------|------|-----------|---------------|
| <b>Middle East</b> | Iran | Fars     | Mamasani              | Iran | Gilan     | Sume'eh Sara  |
| <b>Middle East</b> | Iran | Fars     | Marvdasht             | Iran | Gilan     | Tavalesh      |
| <b>Middle East</b> | Iran | Fars     | Mohr                  | Iran | Golestan  | Aliabad       |
| <b>Middle East</b> | Iran | Fars     | Rostam                | Iran | Golestan  | Azadshahr     |
| <b>Middle East</b> | Iran | Fars     | Sepidan               | Iran | Golestan  | Gorgan        |
| <b>Middle East</b> | Iran | Gilan    | NA                    | Iran | Golestan  | Ramyar        |
| <b>Middle East</b> | Iran | Gilan    | Amlash                | Iran | Hamedan   | NA            |
| <b>Middle East</b> | Iran | Gilan    | Astaneh-ye-Ashrafiyeh | Iran | Hamedan   | Bahar         |
| <b>Middle East</b> | Iran | Gilan    | Astara                | Iran | Hamedan   | Famenin       |
| <b>Middle East</b> | Iran | Gilan    | Bandar-e-Anzali       | Iran | Hamedan   | Hamedan       |
| <b>Middle East</b> | Iran | Gilan    | Fuman                 | Iran | Hamedan   | Kabudarahang  |
| <b>Middle East</b> | Iran | Gilan    | Lahijan               | Iran | Hamedan   | Nahavand      |
| <b>Middle East</b> | Iran | Gilan    | Langrud               | Iran | Hamedan   | Tuyserkan     |
| <b>Middle East</b> | Iran | Gilan    | Masal                 | Iran | Hormozgan | NA            |
| <b>Middle East</b> | Iran | Gilan    | Rasht                 | Iran | Hormozgan | Bandar Abbas  |
| <b>Middle East</b> | Iran | Gilan    | Rezvanshahr           | Iran | Hormozgan | Bandar Lengeh |
| <b>Middle East</b> | Iran | Gilan    | Rudbar                | Iran | Hormozgan | Bastak        |
| <b>Middle East</b> | Iran | Gilan    | Rudsar                | Iran | Hormozgan | Khamir        |
| <b>Middle East</b> | Iran | Gilan    | Shaft                 | Iran | Hormozgan | Qeshm         |
| <b>Middle East</b> | Iran | Gilan    | Siahkal               | Iran | Hormozgan | Rudan         |
| <b>Middle East</b> | Iran | Gilan    | Sume'eh Sara          | Iran | Ilam      | NA            |
| <b>Middle East</b> | Iran | Gilan    | Tavalesh              | Iran | Ilam      | Abdanan       |
| <b>Middle East</b> | Iran | Golestan | NA                    | Iran | Ilam      | Chardavel     |
| <b>Middle East</b> | Iran | Golestan | Aliabad               | Iran | Ilam      | Dehloran      |
| <b>Middle East</b> | Iran | Golestan | Azadshahr             | Iran | Ilam      | Ilam          |
| <b>Middle East</b> | Iran | Golestan | Galikesh              | Iran | Ilam      | Ivan          |
| <b>Middle East</b> | Iran | Golestan | Gorgan                | Iran | Ilam      | Malekshahi    |
| <b>Middle East</b> | Iran | Golestan | Kalaleh               | Iran | Kerman    | Bam           |
| <b>Middle East</b> | Iran | Golestan | Kordkuy               | Iran | Kerman    | Ghaleye-Ganj  |



|                    |      |           |              |      |                   |                  |
|--------------------|------|-----------|--------------|------|-------------------|------------------|
| <b>Middle East</b> | Iran | Golestan  | Minudasht    | Iran | Kerman            | Kahnuj           |
| <b>Middle East</b> | Iran | Golestan  | Ramyar       | Iran | Kerman            | Manujan          |
| <b>Middle East</b> | Iran | Golestan  | Torkaman     | Iran | Kermanshah        | NA               |
| <b>Middle East</b> | Iran | Hamedan   | NA           | Iran | Kermanshah        | Javanrud         |
| <b>Middle East</b> | Iran | Hamedan   | Asadabad     | Iran | Kermanshah        | Kangavar         |
| <b>Middle East</b> | Iran | Hamedan   | Bahar        | Iran | Kermanshah        | Kermanshah       |
| <b>Middle East</b> | Iran | Hamedan   | Famenin      | Iran | Kermanshah        | Paveh            |
| <b>Middle East</b> | Iran | Hamedan   | Hamedan      | Iran | Kermanshah        | Ravansar         |
| <b>Middle East</b> | Iran | Hamedan   | Kabudarahang | Iran | Kermanshah        | Salas-e-Babajani |
| <b>Middle East</b> | Iran | Hamedan   | Malayer      | Iran | Kermanshah        | Sonqor           |
| <b>Middle East</b> | Iran | Hamedan   | Nahavand     | Iran | Khorasan-e-Razavi | NA               |
| <b>Middle East</b> | Iran | Hamedan   | Razan        | Iran | Khorasan-e-Razavi | Bajestan         |
| <b>Middle East</b> | Iran | Hamedan   | Tuysarkan    | Iran | Khorasan-e-Razavi | Bakhras          |
| <b>Middle East</b> | Iran | Hormozgan | NA           | Iran | Khorasan-e-Razavi | Bardaskan        |
| <b>Middle East</b> | Iran | Hormozgan | Bandar Abbas | Iran | Khorasan-e-Razavi | Chenaran         |
| <b>Middle East</b> | Iran | Hormozgan | Bastak       | Iran | Khorasan-e-Razavi | Firooze          |
| <b>Middle East</b> | Iran | Hormozgan | Khamir       | Iran | Khorasan-e-Razavi | Gonabad          |
| <b>Middle East</b> | Iran | Hormozgan | Qeshm        | Iran | Khorasan-e-Razavi | Kashmar          |
| <b>Middle East</b> | Iran | Hormozgan | Rudan        | Iran | Khorasan-e-Razavi | Khaf             |
| <b>Middle East</b> | Iran | Ilam      | NA           | Iran | Khorasan-e-Razavi | Khalil Abad      |

|                    |      |            |              |      |                         |                   |
|--------------------|------|------------|--------------|------|-------------------------|-------------------|
| <b>Middle East</b> | Iran | Ilam       | Abdanan      | Iran | Khorasan-e-Razavi       | Mahvelat          |
| <b>Middle East</b> | Iran | Ilam       | Chardavel    | Iran | Khorasan-e-Razavi       | Mashhad           |
| <b>Middle East</b> | Iran | Ilam       | Darrehshahr  | Iran | Khorasan-e-Razavi       | Neyshabur         |
| <b>Middle East</b> | Iran | Ilam       | Dehloran     | Iran | Khorasan-e-Razavi       | Rashtkhar         |
| <b>Middle East</b> | Iran | Ilam       | Ilam         | Iran | Khorasan-e-Razavi       | Taybad            |
| <b>Middle East</b> | Iran | Ilam       | Ivan         | Iran | Khorasan-e-Razavi       | Torbat-e-Jam      |
| <b>Middle East</b> | Iran | Ilam       | Malekshahi   | Iran | Khuzestan               | NA                |
| <b>Middle East</b> | Iran | Ilam       | Mehran       | Iran | Khuzestan               | Abadan            |
| <b>Middle East</b> | Iran | Kerman     | NA           | Iran | Khuzestan               | Ahvaz             |
| <b>Middle East</b> | Iran | Kerman     | Anbarabad    | Iran | Khuzestan               | Baghemalek        |
| <b>Middle East</b> | Iran | Kerman     | Bam          | Iran | Khuzestan               | Bandar-e-Mahshahr |
| <b>Middle East</b> | Iran | Kerman     | Ghaleye-Ganj | Iran | Khuzestan               | Behbahan          |
| <b>Middle East</b> | Iran | Kerman     | Jiroft       | Iran | Khuzestan               | Haftgol           |
| <b>Middle East</b> | Iran | Kerman     | Kahnuj       | Iran | Khuzestan               | Hendijan          |
| <b>Middle East</b> | Iran | Kerman     | Kerman       | Iran | Khuzestan               | Hoveizeh          |
| <b>Middle East</b> | Iran | Kerman     | Kohbonan     | Iran | Khuzestan               | Masjed Soleyman   |
| <b>Middle East</b> | Iran | Kerman     | Manujan      | Iran | Khuzestan               | Omidiyeh          |
| <b>Middle East</b> | Iran | Kerman     | Ravar        | Iran | Khuzestan               | Ramhormoz         |
| <b>Middle East</b> | Iran | Kermanshah | NA           | Iran | Khuzestan               | Ramshir           |
| <b>Middle East</b> | Iran | Kermanshah | Javanrud     | Iran | Khuzestan               | Shadegan          |
| <b>Middle East</b> | Iran | Kermanshah | Kangavar     | Iran | Kohgiluyeh & Boyerahmad | NA                |

|                    |      |                   |            |      |                         |             |
|--------------------|------|-------------------|------------|------|-------------------------|-------------|
| <b>Middle East</b> | Iran | Kermanshah        | Kermanshah | Iran | Kohgiluyeh & Boyerahmad | Bahmaee     |
| <b>Middle East</b> | Iran | Kermanshah        | Paveh      | Iran | Kohgiluyeh & Boyerahmad | Cheram      |
| <b>Middle East</b> | Iran | Kermanshah        | Ravansar   | Iran | Kohgiluyeh & Boyerahmad | Gachsaran   |
| <b>Middle East</b> | Iran | Kermanshah        | Sonqor     | Iran | Kohgiluyeh & Boyerahmad | Kohgiluyeh  |
| <b>Middle East</b> | Iran | Khorasan-e-Razavi | NA         | Iran | Kordestan               | NA          |
| <b>Middle East</b> | Iran | Khorasan-e-Razavi | Bajestan   | Iran | Kordestan               | Bijar       |
| <b>Middle East</b> | Iran | Khorasan-e-Razavi | Bardaskan  | Iran | Kordestan               | Dehgalan    |
| <b>Middle East</b> | Iran | Khorasan-e-Razavi | Binalood   | Iran | Kordestan               | Divandarreh |
| <b>Middle East</b> | Iran | Khorasan-e-Razavi | Chenaran   | Iran | Kordestan               | Kamyaran    |
| <b>Middle East</b> | Iran | Khorasan-e-Razavi | Darrehgaz  | Iran | Kordestan               | Marivan     |
| <b>Middle East</b> | Iran | Khorasan-e-Razavi | Firooze    | Iran | Kordestan               | Qorveh      |
| <b>Middle East</b> | Iran | Khorasan-e-Razavi | Gonabad    | Iran | Kordestan               | Sanandaj    |
| <b>Middle East</b> | Iran | Khorasan-e-Razavi | Joghatay   | Iran | Kordestan               | Saqqez      |
| <b>Middle East</b> | Iran | Khorasan-e-Razavi | Kashmar    | Iran | Kordestan               | Sarvabad    |
| <b>Middle East</b> | Iran | Khorasan-e-Razavi | Khaf       | Iran | Lorestan                | NA          |

|                    |      |                   |                   |      |            |             |
|--------------------|------|-------------------|-------------------|------|------------|-------------|
| <b>Middle East</b> | Iran | Khorasan-e-Razavi | Khalil Abad       | Iran | Lorestan   | Aligudarz   |
| <b>Middle East</b> | Iran | Khorasan-e-Razavi | Mahvelat          | Iran | Lorestan   | Azna        |
| <b>Middle East</b> | Iran | Khorasan-e-Razavi | Mashhad           | Iran | Lorestan   | Borujerd    |
| <b>Middle East</b> | Iran | Khorasan-e-Razavi | Neyshabur         | Iran | Lorestan   | Delfan      |
| <b>Middle East</b> | Iran | Khorasan-e-Razavi | Quchan            | Iran | Lorestan   | Doreh       |
| <b>Middle East</b> | Iran | Khorasan-e-Razavi | Rashtkhar         | Iran | Lorestan   | Dorud       |
| <b>Middle East</b> | Iran | Khorasan-e-Razavi | Sabzevar          | Iran | Lorestan   | Khorramabad |
| <b>Middle East</b> | Iran | Khorasan-e-Razavi | Taybad            | Iran | Lorestan   | Poldokhtar  |
| <b>Middle East</b> | Iran | Khorasan-e-Razavi | Torbat-e-Jam      | Iran | Lorestan   | Selseleh    |
| <b>Middle East</b> | Iran | Khuzestan         | NA                | Iran | Markazi    | NA          |
| <b>Middle East</b> | Iran | Khuzestan         | Abadan            | Iran | Markazi    | Delijan     |
| <b>Middle East</b> | Iran | Khuzestan         | Ahvaz             | Iran | Markazi    | Khondab     |
| <b>Middle East</b> | Iran | Khuzestan         | Baghemalek        | Iran | Markazi    | Komeijan    |
| <b>Middle East</b> | Iran | Khuzestan         | Bandar-e-Mahshahr | Iran | Markazi    | Mahalat     |
| <b>Middle East</b> | Iran | Khuzestan         | Behbahan          | Iran | Markazi    | Saveh       |
| <b>Middle East</b> | Iran | Khuzestan         | Haftgol           | Iran | Markazi    | Shazand     |
| <b>Middle East</b> | Iran | Khuzestan         | Hendijan          | Iran | Markazi    | Tafresh     |
| <b>Middle East</b> | Iran | Khuzestan         | Hoveizeh          | Iran | Markazi    | Zarandiyeh  |
| <b>Middle East</b> | Iran | Khuzestan         | Khorramshahr      | Iran | Mazandaran | NA          |
| <b>Middle East</b> | Iran | Khuzestan         | Masjed Soleyman   | Iran | Mazandaran | Amol        |
| <b>Middle East</b> | Iran | Khuzestan         | Omidiyeh          | Iran | Mazandaran | Babol       |

|                    |      |                         |             |      |                |            |
|--------------------|------|-------------------------|-------------|------|----------------|------------|
| <b>Middle East</b> | Iran | Khuzestan               | Ramhormoz   | Iran | Mazandaran     | Behshahr   |
| <b>Middle East</b> | Iran | Khuzestan               | Ramshir     | Iran | Mazandaran     | Chalus     |
| <b>Middle East</b> | Iran | Khuzestan               | Shadegan    | Iran | Mazandaran     | Galugah    |
| <b>Middle East</b> | Iran | Kohgiluyeh & Boyerahmad | NA          | Iran | Mazandaran     | Neka       |
| <b>Middle East</b> | Iran | Kohgiluyeh & Boyerahmad | Bahmaee     | Iran | Mazandaran     | Noshahr    |
| <b>Middle East</b> | Iran | Kohgiluyeh & Boyerahmad | Cheram      | Iran | Mazandaran     | Nur        |
| <b>Middle East</b> | Iran | Kohgiluyeh & Boyerahmad | Dena        | Iran | Mazandaran     | Qaemshahr  |
| <b>Middle East</b> | Iran | Kohgiluyeh & Boyerahmad | Gachsaran   | Iran | Mazandaran     | Ramsar     |
| <b>Middle East</b> | Iran | Kohgiluyeh & Boyerahmad | Kohgiluyeh  | Iran | Mazandaran     | Sari       |
| <b>Middle East</b> | Iran | Kordestan               | NA          | Iran | Mazandaran     | Tonekabon  |
| <b>Middle East</b> | Iran | Kordestan               | Baneh       | Iran | North Khorasan | Garmeh     |
| <b>Middle East</b> | Iran | Kordestan               | Bijar       | Iran | North Khorasan | Jajarm     |
| <b>Middle East</b> | Iran | Kordestan               | Dehgalan    | Iran | Qazvin         | NA         |
| <b>Middle East</b> | Iran | Kordestan               | Divandarreh | Iran | Qazvin         | Abyek      |
| <b>Middle East</b> | Iran | Kordestan               | Kamyaran    | Iran | Qazvin         | Alborz     |
| <b>Middle East</b> | Iran | Kordestan               | Marivan     | Iran | Qazvin         | Boyinzahra |
| <b>Middle East</b> | Iran | Kordestan               | Qorveh      | Iran | Qazvin         | Qazvin     |
| <b>Middle East</b> | Iran | Kordestan               | Sanandaj    | Iran | Qom            | NA         |
| <b>Middle East</b> | Iran | Kordestan               | Saqqez      | Iran | Qom            | Qom        |
| <b>Middle East</b> | Iran | Kordestan               | Sarvabad    | Iran | Semnan         | NA         |
| <b>Middle East</b> | Iran | Lorestan                | NA          | Iran | Semnan         | Damghan    |
| <b>Middle East</b> | Iran | Lorestan                | Aligudarz   | Iran | Semnan         | Garmsar    |
| <b>Middle East</b> | Iran | Lorestan                | Azna        | Iran | Semnan         | Mehdishahr |
| <b>Middle East</b> | Iran | Lorestan                | Borujerd    | Iran | Semnan         | Semnan     |

|                    |      |            |             |      |                      |            |
|--------------------|------|------------|-------------|------|----------------------|------------|
| <b>Middle East</b> | Iran | Lorestan   | Delfan      | Iran | Semnan               | Shahrud    |
| <b>Middle East</b> | Iran | Lorestan   | Doreh       | Iran | Sistan & Baluchestan | Chabahar   |
| <b>Middle East</b> | Iran | Lorestan   | Dorud       | Iran | Sistan & Baluchestan | Konarak    |
| <b>Middle East</b> | Iran | Lorestan   | Khorramabad | Iran | South Khorasan       | NA         |
| <b>Middle East</b> | Iran | Lorestan   | Kuhdasht    | Iran | South Khorasan       | Birjand    |
| <b>Middle East</b> | Iran | Lorestan   | Poldokhtar  | Iran | South Khorasan       | Darmiyan   |
| <b>Middle East</b> | Iran | Lorestan   | Selseleh    | Iran | South Khorasan       | Qayenat    |
| <b>Middle East</b> | Iran | Markazi    | NA          | Iran | South Khorasan       | Sarbisheh  |
| <b>Middle East</b> | Iran | Markazi    | Arak        | Iran | Tehran               | NA         |
| <b>Middle East</b> | Iran | Markazi    | Ashtiyān    | Iran | Tehran               | Eslamshahr |
| <b>Middle East</b> | Iran | Markazi    | Delijan     | Iran | Tehran               | Malard     |
| <b>Middle East</b> | Iran | Markazi    | Farahan     | Iran | Tehran               | Pakdasht   |
| <b>Middle East</b> | Iran | Markazi    | Khomeyn     | Iran | Tehran               | Robotkarim |
| <b>Middle East</b> | Iran | Markazi    | Khondab     | Iran | Tehran               | Shahriar   |
| <b>Middle East</b> | Iran | Markazi    | Komeijan    | Iran | Tehran               | Shemiranat |
| <b>Middle East</b> | Iran | Markazi    | Mahalat     | Iran | Tehran               | Tehran     |
| <b>Middle East</b> | Iran | Markazi    | Saveh       | Iran | West Azarbayejan     | NA         |
| <b>Middle East</b> | Iran | Markazi    | Shazand     | Iran | West Azarbayejan     | Bukan      |
| <b>Middle East</b> | Iran | Markazi    | Tafresh     | Iran | West Azarbayejan     | Chaipareh  |
| <b>Middle East</b> | Iran | Markazi    | Zarandiyeh  | Iran | West Azarbayejan     | Chaldoran  |
| <b>Middle East</b> | Iran | Mazandaran | NA          | Iran | West Azarbayejan     | Khoy       |
| <b>Middle East</b> | Iran | Mazandaran | Abbas abad  | Iran | West Azarbayejan     | Mahabad    |

|                    |      |                |               |      |                     |               |
|--------------------|------|----------------|---------------|------|---------------------|---------------|
| <b>Middle East</b> | Iran | Mazandaran     | Amol          | Iran | West<br>Azarbayejan | Maku          |
| <b>Middle East</b> | Iran | Mazandaran     | Babol         | Iran | West<br>Azarbayejan | Miyandoab     |
| <b>Middle East</b> | Iran | Mazandaran     | Babolsar      | Iran | West<br>Azarbayejan | Naqadeh       |
| <b>Middle East</b> | Iran | Mazandaran     | Behshahr      | Iran | West<br>Azarbayejan | Orumiyeh      |
| <b>Middle East</b> | Iran | Mazandaran     | Chalus        | Iran | West<br>Azarbayejan | Piranshahr    |
| <b>Middle East</b> | Iran | Mazandaran     | Fereydunkenar | Iran | West<br>Azarbayejan | Poldasht      |
| <b>Middle East</b> | Iran | Mazandaran     | Galugah       | Iran | West<br>Azarbayejan | Salmas        |
| <b>Middle East</b> | Iran | Mazandaran     | Juybar        | Iran | West<br>Azarbayejan | Shahindezh    |
| <b>Middle East</b> | Iran | Mazandaran     | Mahmoudabad   | Iran | West<br>Azarbayejan | Showt         |
| <b>Middle East</b> | Iran | Mazandaran     | Neka          | Iran | Yazd                | NA            |
| <b>Middle East</b> | Iran | Mazandaran     | Noshahr       | Iran | Yazd                | Ardakan       |
| <b>Middle East</b> | Iran | Mazandaran     | Nur           | Iran | Yazd                | Ashkzar       |
| <b>Middle East</b> | Iran | Mazandaran     | Qaemshahr     | Iran | Yazd                | Behabad       |
| <b>Middle East</b> | Iran | Mazandaran     | Ramsar        | Iran | Yazd                | Meybod        |
| <b>Middle East</b> | Iran | Mazandaran     | Sari          | Iran | Yazd                | Taft          |
| <b>Middle East</b> | Iran | Mazandaran     | Savadkuh      | Iran | Yazd                | Yazd          |
| <b>Middle East</b> | Iran | Mazandaran     | Tonekabon     | Iran | Zanjan              | NA            |
| <b>Middle East</b> | Iran | North Khorasan | Faruj         | Iran | Zanjan              | Abhar         |
| <b>Middle East</b> | Iran | Qazvin         | NA            | Iran | Zanjan              | Ijerud        |
| <b>Middle East</b> | Iran | Qazvin         | Abyek         | Iran | Zanjan              | Khodabandeh   |
| <b>Middle East</b> | Iran | Qazvin         | Alborz        | Iran | Zanjan              | Khorramdarreh |

|                    |      |                         |            |      |        |           |
|--------------------|------|-------------------------|------------|------|--------|-----------|
| <b>Middle East</b> | Iran | Qazvin                  | Boyinzahra | Iran | Zanjan | Mahneshan |
| <b>Middle East</b> | Iran | Qazvin                  | Qazvin     | Iran | Zanjan | Tarom     |
| <b>Middle East</b> | Iran | Qazvin                  | Takestan   | Iran | Zanjan | Zanjan    |
| <b>Middle East</b> | Iran | Qom                     | NA         | NA   | NA     | NA        |
| <b>Middle East</b> | Iran | Qom                     | Qom        | NA   | NA     | NA        |
| <b>Middle East</b> | Iran | Semnan                  | NA         | NA   | NA     | NA        |
| <b>Middle East</b> | Iran | Semnan                  | Damghan    | NA   | NA     | NA        |
| <b>Middle East</b> | Iran | Semnan                  | Garmsar    | NA   | NA     | NA        |
| <b>Middle East</b> | Iran | Semnan                  | Mehdishahr | NA   | NA     | NA        |
| <b>Middle East</b> | Iran | Semnan                  | Semnan     | NA   | NA     | NA        |
| <b>Middle East</b> | Iran | Semnan                  | Shahrud    | NA   | NA     | NA        |
| <b>Middle East</b> | Iran | Sistan &<br>Baluchestan | Chabahar   | NA   | NA     | NA        |
| <b>Middle East</b> | Iran | Sistan &<br>Baluchestan | Zabol      | NA   | NA     | NA        |
| <b>Middle East</b> | Iran | South Khorasan          | NA         | NA   | NA     | NA        |
| <b>Middle East</b> | Iran | South Khorasan          | Birjand    | NA   | NA     | NA        |
| <b>Middle East</b> | Iran | South Khorasan          | Darmiyan   | NA   | NA     | NA        |
| <b>Middle East</b> | Iran | South Khorasan          | Nahbandan  | NA   | NA     | NA        |
| <b>Middle East</b> | Iran | South Khorasan          | Qayenat    | NA   | NA     | NA        |
| <b>Middle East</b> | Iran | South Khorasan          | Sarbisheh  | NA   | NA     | NA        |
| <b>Middle East</b> | Iran | Tehran                  | NA         | NA   | NA     | NA        |
| <b>Middle East</b> | Iran | Tehran                  | Damavand   | NA   | NA     | NA        |
| <b>Middle East</b> | Iran | Tehran                  | Eslamshahr | NA   | NA     | NA        |
| <b>Middle East</b> | Iran | Tehran                  | Firuzkuh   | NA   | NA     | NA        |
| <b>Middle East</b> | Iran | Tehran                  | Malard     | NA   | NA     | NA        |
| <b>Middle East</b> | Iran | Tehran                  | Pakdasht   | NA   | NA     | NA        |
| <b>Middle East</b> | Iran | Tehran                  | Qods       | NA   | NA     | NA        |
| <b>Middle East</b> | Iran | Tehran                  | Robotkarim | NA   | NA     | NA        |



|                    |      |                     |            |    |    |    |
|--------------------|------|---------------------|------------|----|----|----|
| <b>Middle East</b> | Iran | Tehran              | Shahriar   | NA | NA | NA |
| <b>Middle East</b> | Iran | Tehran              | Shemiranat | NA | NA | NA |
| <b>Middle East</b> | Iran | Tehran              | Tehran     | NA | NA | NA |
| <b>Middle East</b> | Iran | Tehran              | Varamin    | NA | NA | NA |
| <b>Middle East</b> | Iran | West<br>Azarbayejan | NA         | NA | NA | NA |
| <b>Middle East</b> | Iran | West<br>Azarbayejan | Bukan      | NA | NA | NA |
| <b>Middle East</b> | Iran | West<br>Azarbayejan | Chaipareh  | NA | NA | NA |
| <b>Middle East</b> | Iran | West<br>Azarbayejan | Chaldoran  | NA | NA | NA |
| <b>Middle East</b> | Iran | West<br>Azarbayejan | Khoy       | NA | NA | NA |
| <b>Middle East</b> | Iran | West<br>Azarbayejan | Mahabad    | NA | NA | NA |
| <b>Middle East</b> | Iran | West<br>Azarbayejan | Maku       | NA | NA | NA |
| <b>Middle East</b> | Iran | West<br>Azarbayejan | Miyandoab  | NA | NA | NA |
| <b>Middle East</b> | Iran | West<br>Azarbayejan | Naqadeh    | NA | NA | NA |
| <b>Middle East</b> | Iran | West<br>Azarbayejan | Orumiyeh   | NA | NA | NA |
| <b>Middle East</b> | Iran | West<br>Azarbayejan | Oshnaviyeh | NA | NA | NA |
| <b>Middle East</b> | Iran | West<br>Azarbayejan | Piranshahr | NA | NA | NA |
| <b>Middle East</b> | Iran | West<br>Azarbayejan | Poldasht   | NA | NA | NA |

|                    |             |                     |               |           |                        |      |
|--------------------|-------------|---------------------|---------------|-----------|------------------------|------|
| <b>Middle East</b> | Iran        | West<br>Azarbayejan | Salmas        | NA        | NA                     | NA   |
| <b>Middle East</b> | Iran        | West<br>Azarbayejan | Sardasht      | NA        | NA                     | NA   |
| <b>Middle East</b> | Iran        | West<br>Azarbayejan | Shahindezh    | NA        | NA                     | NA   |
| <b>Middle East</b> | Iran        | West<br>Azarbayejan | Showt         | NA        | NA                     | NA   |
| <b>Middle East</b> | Iran        | West<br>Azarbayejan | Takab         | NA        | NA                     | NA   |
| <b>Middle East</b> | Iran        | Yazd                | NA            | NA        | NA                     | NA   |
| <b>Middle East</b> | Iran        | Yazd                | Abarkuh       | NA        | NA                     | NA   |
| <b>Middle East</b> | Iran        | Yazd                | Ardakan       | NA        | NA                     | NA   |
| <b>Middle East</b> | Iran        | Yazd                | Ashkzar       | NA        | NA                     | NA   |
| <b>Middle East</b> | Iran        | Yazd                | Behabad       | NA        | NA                     | NA   |
| <b>Middle East</b> | Iran        | Yazd                | Mehriz        | NA        | NA                     | NA   |
| <b>Middle East</b> | Iran        | Yazd                | Meybod        | NA        | NA                     | NA   |
| <b>Middle East</b> | Iran        | Yazd                | Taft          | NA        | NA                     | NA   |
| <b>Middle East</b> | Iran        | Yazd                | Yazd          | NA        | NA                     | NA   |
| <b>Middle East</b> | Iran        | Zanjan              | NA            | NA        | NA                     | NA   |
| <b>Middle East</b> | Iran        | Zanjan              | Abhar         | NA        | NA                     | NA   |
| <b>Middle East</b> | Iran        | Zanjan              | Ijerud        | NA        | NA                     | NA   |
| <b>Middle East</b> | Iran        | Zanjan              | Khodabandeh   | NA        | NA                     | NA   |
| <b>Middle East</b> | Iran        | Zanjan              | Khorramdarreh | NA        | NA                     | NA   |
| <b>Middle East</b> | Iran        | Zanjan              | Mahneshan     | NA        | NA                     | NA   |
| <b>Middle East</b> | Iran        | Zanjan              | Tarom         | NA        | NA                     | NA   |
| <b>Middle East</b> | Iran        | Zanjan              | Zanjan        | NA        | NA                     | NA   |
| <b>Oceania</b>     | Timor-Leste | Ainaro              | Hato Builico  | Indonesia | Nusa Tenggara<br>Timur | Alor |

|                       |             |                    |             |             |                     |              |
|-----------------------|-------------|--------------------|-------------|-------------|---------------------|--------------|
| <b>Oceania</b>        | Timor-Leste | Ainaro             | Maubisse    | Indonesia   | Nusa Tenggara Timur | Belu         |
| <b>Oceania</b>        | Timor-Leste | Manufahi           | Fato Berliu | Timor-Leste | Ainaro              | Hato Builico |
| <b>Oceania</b>        | Timor-Leste | Manufahi           | Turiscái    | Timor-Leste | Ainaro              | Maubisse     |
| <b>NA</b>             | NA          | NA                 | NA          | Timor-Leste | Lautém              | Tutuala      |
| <b>NA</b>             | NA          | NA                 | NA          | Timor-Leste | Manatuto            | Laclubar     |
| <b>NA</b>             | NA          | NA                 | NA          | Timor-Leste | Manatuto            | Laleia       |
| <b>NA</b>             | NA          | NA                 | NA          | Timor-Leste | Manatuto            | Soibada      |
| <b>NA</b>             | NA          | NA                 | NA          | Timor-Leste | Manufahi            | NA           |
| <b>NA</b>             | NA          | NA                 | NA          | Timor-Leste | Manufahi            | Alas         |
| <b>NA</b>             | NA          | NA                 | NA          | Timor-Leste | Manufahi            | Fato Berliu  |
| <b>NA</b>             | NA          | NA                 | NA          | Timor-Leste | Manufahi            | Same         |
| <b>NA</b>             | NA          | NA                 | NA          | Timor-Leste | Manufahi            | Turiscái     |
| <b>NA</b>             | NA          | NA                 | NA          | Timor-Leste | Viqueque            | Lacluta      |
| <b>NA</b>             | NA          | NA                 | NA          | Timor-Leste | Viqueque            | Uato Carbau  |
| <b>NA</b>             | NA          | NA                 | NA          | Timor-Leste | Viqueque            | Viqueque     |
| <b>NA</b>             | NA          | NA                 | NA          | India       | Mizoram             | Champhai     |
| <b>Southeast Asia</b> | Thailand    | Bangkok Metropolis | NA          | Thailand    | NA                  | NA           |
| <b>Southeast Asia</b> | Thailand    | Bangkok Metropolis | Bang Kapi   | Thailand    | Bangkok Metropolis  | NA           |
| <b>Southeast Asia</b> | Thailand    | Bangkok Metropolis | Bang Khae   | Thailand    | Bangkok Metropolis  | Bang Khae    |
| <b>Southeast Asia</b> | Thailand    | Bangkok Metropolis | Bang Na     | Thailand    | Bangkok Metropolis  | Bang Na      |
| <b>Southeast Asia</b> | Thailand    | Bangkok Metropolis | Chatuchak   | Thailand    | Bangkok Metropolis  | Chatuchak    |
| <b>Southeast Asia</b> | Thailand    | Bangkok Metropolis | Din Dang    | Thailand    | Bangkok Metropolis  | Huai Kwang   |

|                       |          |                       |                   |          |                       |                       |
|-----------------------|----------|-----------------------|-------------------|----------|-----------------------|-----------------------|
| <b>Southeast Asia</b> | Thailand | Bangkok<br>Metropolis | Huai Kwang        | Thailand | Bangkok<br>Metropolis | Phaya Thai            |
| <b>Southeast Asia</b> | Thailand | Bangkok<br>Metropolis | Khlong Toey       | Thailand | Bangkok<br>Metropolis | Wattana               |
| <b>Southeast Asia</b> | Thailand | Bangkok<br>Metropolis | Nongkheam         | Thailand | Buri Ram              | Non Din Daeng         |
| <b>Southeast Asia</b> | Thailand | Bangkok<br>Metropolis | Phaya Thai        | Thailand | Chachoengsao          | NA                    |
| <b>Southeast Asia</b> | Thailand | Bangkok<br>Metropolis | Suan Luang        | Thailand | Chachoengsao          | Ban Pho               |
| <b>Southeast Asia</b> | Thailand | Bangkok<br>Metropolis | Wang Thonglang    | Thailand | Chachoengsao          | Muang<br>Chachoengsao |
| <b>Southeast Asia</b> | Thailand | Bangkok<br>Metropolis | Wattana           | Thailand | Chachoengsao          | Sanam Chaikhet        |
| <b>Southeast Asia</b> | Thailand | Chanthaburi           | NA                | Thailand | Chachoengsao          | Tha Ta Kieb           |
| <b>Southeast Asia</b> | Thailand | Chanthaburi           | K. Kao Kichakut   | Thailand | Chanthaburi           | NA                    |
| <b>Southeast Asia</b> | Thailand | Chanthaburi           | K. Na Yai Am      | Thailand | Chanthaburi           | K. Kao Kichakut       |
| <b>Southeast Asia</b> | Thailand | Chanthaburi           | Kang Hang Maeo    | Thailand | Chanthaburi           | K. Na Yai Am          |
| <b>Southeast Asia</b> | Thailand | Chanthaburi           | Khlung            | Thailand | Chanthaburi           | Kang Hang Maeo        |
| <b>Southeast Asia</b> | Thailand | Chanthaburi           | Makham            | Thailand | Chanthaburi           | Khlung                |
| <b>Southeast Asia</b> | Thailand | Chanthaburi           | Muang Chanthaburi | Thailand | Chanthaburi           | Makham                |
| <b>Southeast Asia</b> | Thailand | Chanthaburi           | Pong Nam Ron      | Thailand | Chanthaburi           | Muang<br>Chanthaburi  |
| <b>Southeast Asia</b> | Thailand | Chanthaburi           | Tha Mai           | Thailand | Chanthaburi           | Pong Nam Ron          |
| <b>Southeast Asia</b> | Thailand | Chiang Mai            | NA                | Thailand | Chanthaburi           | Tha Mai               |
| <b>Southeast Asia</b> | Thailand | Chiang Mai            | Chiang Dao        | Thailand | Chiang Mai            | NA                    |
| <b>Southeast Asia</b> | Thailand | Chiang Mai            | Chom Thong        | Thailand | Chiang Mai            | Chiang Dao            |
| <b>Southeast Asia</b> | Thailand | Chiang Mai            | Doi Saket         | Thailand | Chiang Mai            | Chom Thong            |
| <b>Southeast Asia</b> | Thailand | Chiang Mai            | Doi Tao           | Thailand | Chiang Mai            | Doi Saket             |
| <b>Southeast Asia</b> | Thailand | Chiang Mai            | Fang              | Thailand | Chiang Mai            | Doi Tao               |

|                       |          |            |                  |          |            |                     |
|-----------------------|----------|------------|------------------|----------|------------|---------------------|
| <b>Southeast Asia</b> | Thailand | Chiang Mai | Hang Dong        | Thailand | Chiang Mai | Fang                |
| <b>Southeast Asia</b> | Thailand | Chiang Mai | Hot              | Thailand | Chiang Mai | Hang Dong           |
| <b>Southeast Asia</b> | Thailand | Chiang Mai | K. Doi Lo        | Thailand | Chiang Mai | Hot                 |
| <b>Southeast Asia</b> | Thailand | Chiang Mai | K. Mae On        | Thailand | Chiang Mai | K. Doi Lo           |
| <b>Southeast Asia</b> | Thailand | Chiang Mai | Mae Ai           | Thailand | Chiang Mai | K. Mae On           |
| <b>Southeast Asia</b> | Thailand | Chiang Mai | Mae Chaem        | Thailand | Chiang Mai | Mae Ai              |
| <b>Southeast Asia</b> | Thailand | Chiang Mai | Mae Rim          | Thailand | Chiang Mai | Mae Chaem           |
| <b>Southeast Asia</b> | Thailand | Chiang Mai | Mae Taeng        | Thailand | Chiang Mai | Mae Rim             |
| <b>Southeast Asia</b> | Thailand | Chiang Mai | Mae Wang         | Thailand | Chiang Mai | Mae Taeng           |
| <b>Southeast Asia</b> | Thailand | Chiang Mai | Muang Chiang Mai | Thailand | Chiang Mai | Mae Wang            |
| <b>Southeast Asia</b> | Thailand | Chiang Mai | Omkoï            | Thailand | Chiang Mai | Muang Chiang<br>Mai |
| <b>Southeast Asia</b> | Thailand | Chiang Mai | Phrao            | Thailand | Chiang Mai | Omkoï               |
| <b>Southeast Asia</b> | Thailand | Chiang Mai | Samoeng          | Thailand | Chiang Mai | Phrao               |
| <b>Southeast Asia</b> | Thailand | Chiang Mai | San Kamphaeng    | Thailand | Chiang Mai | Samoeng             |
| <b>Southeast Asia</b> | Thailand | Chiang Mai | San Pa Tong      | Thailand | Chiang Mai | San Kamphaeng       |
| <b>Southeast Asia</b> | Thailand | Chiang Mai | San Sai          | Thailand | Chiang Mai | San Pa Tong         |
| <b>Southeast Asia</b> | Thailand | Chiang Mai | Saraphi          | Thailand | Chiang Mai | San Sai             |
| <b>Southeast Asia</b> | Thailand | Chiang Mai | Wiang Haeng      | Thailand | Chiang Mai | Saraphi             |
| <b>Southeast Asia</b> | Thailand | Chiang Rai | Khun Tan         | Thailand | Chiang Mai | Wiang Haeng         |
| <b>Southeast Asia</b> | Thailand | Chiang Rai | Mae Suai         | Thailand | Chiang Rai | Khun Tan            |
| <b>Southeast Asia</b> | Thailand | Chiang Rai | Pa Daet          | Thailand | Chiang Rai | Mae Suai            |
| <b>Southeast Asia</b> | Thailand | Chiang Rai | Phan             | Thailand | Chiang Rai | Phan                |
| <b>Southeast Asia</b> | Thailand | Chiang Rai | Thoeng           | Thailand | Chiang Rai | Thoeng              |
| <b>Southeast Asia</b> | Thailand | Chiang Rai | Wiang Pa Pao     | Thailand | Chiang Rai | Wiang Pa Pao        |
| <b>Southeast Asia</b> | Thailand | Chon Buri  | Ban Bung         | Thailand | Chon Buri  | NA                  |
| <b>Southeast Asia</b> | Thailand | Chon Buri  | Bo Thong         | Thailand | Chon Buri  | Ban Bung            |
| <b>Southeast Asia</b> | Thailand | Chon Buri  | Nong Yai         | Thailand | Chon Buri  | Bo Thong            |
| <b>Southeast Asia</b> | Thailand | Chon Buri  | Phanat Nikhom    | Thailand | Chon Buri  | K. Ko Chan          |

|                       |          |              |                    |          |           |                    |
|-----------------------|----------|--------------|--------------------|----------|-----------|--------------------|
| <b>Southeast Asia</b> | Thailand | Lampang      | NA                 | Thailand | Chon Buri | Muang Chon Buri    |
| <b>Southeast Asia</b> | Thailand | Lampang      | Chae Hom           | Thailand | Chon Buri | Nong Yai           |
| <b>Southeast Asia</b> | Thailand | Lampang      | Hang Chat          | Thailand | Chon Buri | Phan Thong         |
| <b>Southeast Asia</b> | Thailand | Lampang      | Ko Kha             | Thailand | Chon Buri | Phanat Nikhom      |
| <b>Southeast Asia</b> | Thailand | Lampang      | Mae Mo             | Thailand | Lampang   | NA                 |
| <b>Southeast Asia</b> | Thailand | Lampang      | Mae Phrik          | Thailand | Lampang   | Chae Hom           |
| <b>Southeast Asia</b> | Thailand | Lampang      | Mae Tha            | Thailand | Lampang   | Hang Chat          |
| <b>Southeast Asia</b> | Thailand | Lampang      | Muang Lampang      | Thailand | Lampang   | Ko Kha             |
| <b>Southeast Asia</b> | Thailand | Lampang      | Mueang Pan         | Thailand | Lampang   | Mae Mo             |
| <b>Southeast Asia</b> | Thailand | Lampang      | Ngao               | Thailand | Lampang   | Mae Phrik          |
| <b>Southeast Asia</b> | Thailand | Lampang      | Soem Ngam          | Thailand | Lampang   | Mae Tha            |
| <b>Southeast Asia</b> | Thailand | Lampang      | Sop Prap           | Thailand | Lampang   | Muang Lampang      |
| <b>Southeast Asia</b> | Thailand | Lampang      | Wang Nua           | Thailand | Lampang   | Mueang Pan         |
| <b>Southeast Asia</b> | Thailand | Lamphun      | NA                 | Thailand | Lampang   | Ngao               |
| <b>Southeast Asia</b> | Thailand | Lamphun      | Ban Hong           | Thailand | Lampang   | Soem Ngam          |
| <b>Southeast Asia</b> | Thailand | Lamphun      | K. Wiang Nong Long | Thailand | Lampang   | Sop Prap           |
| <b>Southeast Asia</b> | Thailand | Lamphun      | Li                 | Thailand | Lampang   | Thoen              |
| <b>Southeast Asia</b> | Thailand | Lamphun      | Mae Tha            | Thailand | Lampang   | Wang Nua           |
| <b>Southeast Asia</b> | Thailand | Lamphun      | Pa Sang            | Thailand | Lamphun   | NA                 |
| <b>Southeast Asia</b> | Thailand | Lamphun      | Thung Hua Chang    | Thailand | Lamphun   | Ban Hong           |
| <b>Southeast Asia</b> | Thailand | Loei         | Dan Sai            | Thailand | Lamphun   | Ban Thi            |
| <b>Southeast Asia</b> | Thailand | Loei         | Na Haeo            | Thailand | Lamphun   | K. Wiang Nong Long |
| <b>Southeast Asia</b> | Thailand | Loei         | Phu Rua            | Thailand | Lamphun   | Li                 |
| <b>Southeast Asia</b> | Thailand | Loei         | Tha Li             | Thailand | Lamphun   | Mae Tha            |
| <b>Southeast Asia</b> | Thailand | Mae Hong Son | NA                 | Thailand | Lamphun   | Muang Lamphun      |
| <b>Southeast Asia</b> | Thailand | Mae Hong Son | Khun Yuam          | Thailand | Lamphun   | Pa Sang            |
| <b>Southeast Asia</b> | Thailand | Mae Hong Son | Mae La Noi         | Thailand | Lamphun   | Thung Hua Chang    |
| <b>Southeast Asia</b> | Thailand | Mae Hong Son | Mae Sariang        | Thailand | Loei      | NA                 |

|                       |          |               |                    |          |               |                    |
|-----------------------|----------|---------------|--------------------|----------|---------------|--------------------|
| <b>Southeast Asia</b> | Thailand | Mae Hong Son  | Muang Mae Hong Son | Thailand | Loei          | Dan Sai            |
| <b>Southeast Asia</b> | Thailand | Mae Hong Son  | Pai                | Thailand | Loei          | Muang Loei         |
| <b>Southeast Asia</b> | Thailand | Mae Hong Son  | Pang Ma Pha        | Thailand | Loei          | Na Haeo            |
| <b>Southeast Asia</b> | Thailand | Mae Hong Son  | Sop Moei           | Thailand | Loei          | Phu Rua            |
| <b>Southeast Asia</b> | Thailand | Nakhon Pathom | Sam Phran          | Thailand | Loei          | Tha Li             |
| <b>Southeast Asia</b> | Thailand | Nan           | NA                 | Thailand | Mae Hong Son  | NA                 |
| <b>Southeast Asia</b> | Thailand | Nan           | Ban Luang          | Thailand | Mae Hong Son  | Khun Yuam          |
| <b>Southeast Asia</b> | Thailand | Nan           | Bo Klue            | Thailand | Mae Hong Son  | Mae La Noi         |
| <b>Southeast Asia</b> | Thailand | Nan           | Chalermphrakiet    | Thailand | Mae Hong Son  | Mae Sariang        |
| <b>Southeast Asia</b> | Thailand | Nan           | Chiang Klang       | Thailand | Mae Hong Son  | Muang Mae Hong Son |
| <b>Southeast Asia</b> | Thailand | Nan           | K. Phu Pieng       | Thailand | Mae Hong Son  | Pai                |
| <b>Southeast Asia</b> | Thailand | Nan           | Mae Charim         | Thailand | Mae Hong Son  | Pang Ma Pha        |
| <b>Southeast Asia</b> | Thailand | Nan           | Muang Nan          | Thailand | Mae Hong Son  | Sop Moei           |
| <b>Southeast Asia</b> | Thailand | Nan           | Na Mun             | Thailand | Nakhon Pathom | Sam Phran          |
| <b>Southeast Asia</b> | Thailand | Nan           | Na Noi             | Thailand | Nan           | NA                 |
| <b>Southeast Asia</b> | Thailand | Nan           | Pua                | Thailand | Nan           | Ban Luang          |
| <b>Southeast Asia</b> | Thailand | Nan           | Santi Suk          | Thailand | Nan           | Bo Klue            |
| <b>Southeast Asia</b> | Thailand | Nan           | Song Kwae          | Thailand | Nan           | Chalermphrakiet    |
| <b>Southeast Asia</b> | Thailand | Nan           | Tha Wang Pha       | Thailand | Nan           | Chiang Klang       |
| <b>Southeast Asia</b> | Thailand | Nan           | Thung Chang        | Thailand | Nan           | K. Phu Pieng       |
| <b>Southeast Asia</b> | Thailand | Nan           | Wiang Sa           | Thailand | Nan           | Mae Charim         |
| <b>Southeast Asia</b> | Thailand | Phayao        | NA                 | Thailand | Nan           | Muang Nan          |
| <b>Southeast Asia</b> | Thailand | Phayao        | Chiang Kham        | Thailand | Nan           | Na Mun             |
| <b>Southeast Asia</b> | Thailand | Phayao        | Chiang Muan        | Thailand | Nan           | Na Noi             |
| <b>Southeast Asia</b> | Thailand | Phayao        | Chun               | Thailand | Nan           | Pua                |
| <b>Southeast Asia</b> | Thailand | Phayao        | Dok Kham Tai       | Thailand | Nan           | Santi Suk          |
| <b>Southeast Asia</b> | Thailand | Phayao        | K. Phu Kam Yao     | Thailand | Nan           | Song Kwae          |

|                       |          |                          |                          |          |             |                   |
|-----------------------|----------|--------------------------|--------------------------|----------|-------------|-------------------|
| <b>Southeast Asia</b> | Thailand | Phayao                   | K. Phu Sang              | Thailand | Nan         | Tha Wang Pha      |
| <b>Southeast Asia</b> | Thailand | Phayao                   | Mae Chai                 | Thailand | Nan         | Thung Chang       |
| <b>Southeast Asia</b> | Thailand | Phayao                   | Muang Phayao             | Thailand | Nan         | Wiang Sa          |
| <b>Southeast Asia</b> | Thailand | Phayao                   | Pong                     | Thailand | Phayao      | NA                |
| <b>Southeast Asia</b> | Thailand | Phetchabun               | Lom Kao                  | Thailand | Phayao      | Chiang Kham       |
| <b>Southeast Asia</b> | Thailand | Phitsanulok              | NA                       | Thailand | Phayao      | Chiang Muan       |
| <b>Southeast Asia</b> | Thailand | Phitsanulok              | Chat Trakan              | Thailand | Phayao      | Chun              |
| <b>Southeast Asia</b> | Thailand | Phitsanulok              | Muang Phitsanulok        | Thailand | Phayao      | Dok Kham Tai      |
| <b>Southeast Asia</b> | Thailand | Phitsanulok              | Nakhon Thai              | Thailand | Phayao      | K. Phu Kam Yao    |
| <b>Southeast Asia</b> | Thailand | Phitsanulok              | Wang Thong               | Thailand | Phayao      | K. Phu Sang       |
| <b>Southeast Asia</b> | Thailand | Phra Nakhon Si Ayutthaya | Phra Nakhon Si Ayutthaya | Thailand | Phayao      | Mae Chai          |
| <b>Southeast Asia</b> | Thailand | Phra Nakhon Si Ayutthaya | Uthai                    | Thailand | Phayao      | Muang Phayao      |
| <b>Southeast Asia</b> | Thailand | Phra Nakhon Si Ayutthaya | Wang Noi                 | Thailand | Phayao      | Pong              |
| <b>Southeast Asia</b> | Thailand | Phrae                    | NA                       | Thailand | Phetchabun  | Lom Kao           |
| <b>Southeast Asia</b> | Thailand | Phrae                    | Den Chai                 | Thailand | Phetchabun  | Wang Pong         |
| <b>Southeast Asia</b> | Thailand | Phrae                    | Long                     | Thailand | Phichit     | K. Sak Lek        |
| <b>Southeast Asia</b> | Thailand | Phrae                    | Muang Phrae              | Thailand | Phichit     | Wachira Barami    |
| <b>Southeast Asia</b> | Thailand | Phrae                    | Nong Muang Kai           | Thailand | Phichit     | Wang Sai Phun     |
| <b>Southeast Asia</b> | Thailand | Phrae                    | Rong Kwang               | Thailand | Phitsanulok | NA                |
| <b>Southeast Asia</b> | Thailand | Phrae                    | Song                     | Thailand | Phitsanulok | Bang Krathum      |
| <b>Southeast Asia</b> | Thailand | Phrae                    | Sung Men                 | Thailand | Phitsanulok | Chat Trakan       |
| <b>Southeast Asia</b> | Thailand | Rayong                   | NA                       | Thailand | Phitsanulok | Muang Phitsanulok |
| <b>Southeast Asia</b> | Thailand | Rayong                   | Ban Khai                 | Thailand | Phitsanulok | Nakhon Thai       |
| <b>Southeast Asia</b> | Thailand | Rayong                   | K. Khao Chamao           | Thailand | Phitsanulok | Noen Maprang      |
| <b>Southeast Asia</b> | Thailand | Rayong                   | K. Nikhom Pattan         | Thailand | Phitsanulok | Phrom Phiram      |



|                       |          |           |                 |          |              |                  |
|-----------------------|----------|-----------|-----------------|----------|--------------|------------------|
| <b>Southeast Asia</b> | Thailand | Rayong    | Klaeng          | Thailand | Phitsanulok  | Wang Thong       |
| <b>Southeast Asia</b> | Thailand | Rayong    | Muang Rayong    | Thailand | Phitsanulok  | Wat Bot          |
| <b>Southeast Asia</b> | Thailand | Rayong    | Pluak Daeng     | Thailand | Phrae        | NA               |
| <b>Southeast Asia</b> | Thailand | Rayong    | Wang Chan       | Thailand | Phrae        | Den Chai         |
| <b>Southeast Asia</b> | Thailand | Sa Kaeo   | NA              | Thailand | Phrae        | Long             |
| <b>Southeast Asia</b> | Thailand | Sa Kaeo   | K. Kok Sung     | Thailand | Phrae        | Muang Phrae      |
| <b>Southeast Asia</b> | Thailand | Sa Kaeo   | K. Wang Sombun  | Thailand | Phrae        | Nong Muang Kai   |
| <b>Southeast Asia</b> | Thailand | Sa Kaeo   | Wang Nam Yen    | Thailand | Phrae        | Rong Kwang       |
| <b>Southeast Asia</b> | Thailand | Sa Kaeo   | Wattana Nakhon  | Thailand | Phrae        | Song             |
| <b>Southeast Asia</b> | Thailand | Sing Buri | Muang Sing Buri | Thailand | Phrae        | Sung Men         |
| <b>Southeast Asia</b> | Thailand | Trat      | NA              | Thailand | Prachin Buri | Kabin Buri       |
| <b>Southeast Asia</b> | Thailand | Trat      | Bo Rai          | Thailand | Rayong       | NA               |
| <b>Southeast Asia</b> | Thailand | Trat      | Laem Ngop       | Thailand | Rayong       | Ban Chang        |
| <b>Southeast Asia</b> | Thailand | Uttaradit | NA              | Thailand | Rayong       | Ban Khai         |
| <b>Southeast Asia</b> | Thailand | Uttaradit | Ban Khok        | Thailand | Rayong       | K. Khao Chamao   |
| <b>Southeast Asia</b> | Thailand | Uttaradit | Fak Tha         | Thailand | Rayong       | K. Nikhom Pattan |
| <b>Southeast Asia</b> | Thailand | Uttaradit | Muang Uttaradit | Thailand | Rayong       | Klaeng           |
| <b>Southeast Asia</b> | Thailand | Uttaradit | Nam Pat         | Thailand | Rayong       | Muang Rayong     |
| <b>Southeast Asia</b> | Thailand | Uttaradit | Tha Pla         | Thailand | Rayong       | Wang Chan        |
| <b>Southeast Asia</b> | Thailand | Uttaradit | Thong Saen Khan | Thailand | Sa Kaeo      | NA               |
| <b>Southeast Asia</b> | Vietnam  | An Giang  | NA              | Thailand | Sa Kaeo      | Aranyaprathet    |
| <b>Southeast Asia</b> | Vietnam  | An Giang  | Châu Phú        | Thailand | Sa Kaeo      | K. Kok Sung      |
| <b>Southeast Asia</b> | Vietnam  | An Giang  | Châu Thành      | Thailand | Sa Kaeo      | K. Wang Sombun   |
| <b>Southeast Asia</b> | Vietnam  | An Giang  | Chợ Mới         | Thailand | Sa Kaeo      | Kao Cha Kan      |
| <b>Southeast Asia</b> | Vietnam  | An Giang  | Long Xuyên      | Thailand | Sa Kaeo      | Khlong Hat       |
| <b>Southeast Asia</b> | Vietnam  | An Giang  | Phú Tân         | Thailand | Sa Kaeo      | Muang Sa Kaeo    |
| <b>Southeast Asia</b> | Vietnam  | An Giang  | Thọ Sơn         | Thailand | Sa Kaeo      | Ta Phraya        |
| <b>Southeast Asia</b> | Vietnam  | An Giang  | Tân Châu        | Thailand | Sa Kaeo      | Wang Nam Yen     |

|                       |         |           |             |          |              |                 |
|-----------------------|---------|-----------|-------------|----------|--------------|-----------------|
| <b>Southeast Asia</b> | Vietnam | Bắc Giang | Hiệp Hòa    | Thailand | Sa Kaeo      | Watthana Nakhon |
| <b>Southeast Asia</b> | Vietnam | Bắc Giang | Tân Yên     | Thailand | Samut Sakhon | Krathum Baen    |
| <b>Southeast Asia</b> | Vietnam | Bắc Giang | Việt Yên    | Thailand | Tak          | Mae Ramat       |
| <b>Southeast Asia</b> | Vietnam | Bắc Giang | Yên Dũng    | Thailand | Tak          | Sam Ngao        |
| <b>Southeast Asia</b> | Vietnam | Bắc Giang | Yên Thế     | Thailand | Tak          | Tha Song Yang   |
| <b>Southeast Asia</b> | Vietnam | Bắc Ninh  | NA          | Thailand | Trat         | NA              |
| <b>Southeast Asia</b> | Vietnam | Bắc Ninh  | Bắc Ninh    | Thailand | Trat         | Bo Rai          |
| <b>Southeast Asia</b> | Vietnam | Bắc Ninh  | Gia Bình    | Thailand | Trat         | Khao Saming     |
| <b>Southeast Asia</b> | Vietnam | Bắc Ninh  | Lương Tài   | Thailand | Trat         | Laem Ngop       |
| <b>Southeast Asia</b> | Vietnam | Bắc Ninh  | Quế Võ      | Thailand | Uttaradit    | NA              |
| <b>Southeast Asia</b> | Vietnam | Bắc Ninh  | Thuận Thành | Thailand | Uttaradit    | Ban Khok        |
| <b>Southeast Asia</b> | Vietnam | Bắc Ninh  | Tiên Du     | Thailand | Uttaradit    | Fak Tha         |
| <b>Southeast Asia</b> | Vietnam | Bắc Ninh  | Từ Sơn      | Thailand | Uttaradit    | Muang Uttaradit |
| <b>Southeast Asia</b> | Vietnam | Bắc Ninh  | Yên Phong   | Thailand | Uttaradit    | Nam Pat         |
| <b>Southeast Asia</b> | Vietnam | Bến Tre   | Ba Tri      | Thailand | Uttaradit    | Tha Pla         |
| <b>Southeast Asia</b> | Vietnam | Bến Tre   | Giồng Trôm  | Thailand | Uttaradit    | Thong Saen Khan |
| <b>Southeast Asia</b> | Vietnam | Bến Tre   | Mỏ Cày Bắc  | Vietnam  | An Giang     | NA              |
| <b>Southeast Asia</b> | Vietnam | Cần Thơ   | NA          | Vietnam  | An Giang     | Châu Phú        |
| <b>Southeast Asia</b> | Vietnam | Cần Thơ   | Bình Thủy   | Vietnam  | An Giang     | Châu Thành      |
| <b>Southeast Asia</b> | Vietnam | Cần Thơ   | Cái Răng    | Vietnam  | An Giang     | Châu Đốc        |
| <b>Southeast Asia</b> | Vietnam | Cần Thơ   | Cờ Đỏ       | Vietnam  | An Giang     | Chợ Mới         |
| <b>Southeast Asia</b> | Vietnam | Cần Thơ   | Ninh Kiều   | Vietnam  | An Giang     | Long Xuyên      |
| <b>Southeast Asia</b> | Vietnam | Cần Thơ   | Phong Điền  | Vietnam  | An Giang     | Phú Tân         |
| <b>Southeast Asia</b> | Vietnam | Cần Thơ   | Thốt Nốt    | Vietnam  | An Giang     | Thoại Sơn       |
| <b>Southeast Asia</b> | Vietnam | Cần Thơ   | Thới Lai    | Vietnam  | An Giang     | Tân Châu        |
| <b>Southeast Asia</b> | Vietnam | Cần Thơ   | Vĩnh Thạnh  | Vietnam  | An Giang     | Tịnh Biên       |
| <b>Southeast Asia</b> | Vietnam | Cần Thơ   | Ô Môn       | Vietnam  | Bắc Giang    | Hiệp Hòa        |
| <b>Southeast Asia</b> | Vietnam | Hoà Bình  | Lạc Thủy    | Vietnam  | Bắc Giang    | Lạng Giang      |

|                       |         |          |              |         |           |             |
|-----------------------|---------|----------|--------------|---------|-----------|-------------|
| <b>Southeast Asia</b> | Vietnam | Hà Nam   | NA           | Vietnam | Bắc Giang | Tân Yên     |
| <b>Southeast Asia</b> | Vietnam | Hà Nam   | Bình Lục     | Vietnam | Bắc Giang | Việt Yên    |
| <b>Southeast Asia</b> | Vietnam | Hà Nam   | Duy Tiên     | Vietnam | Bắc Giang | Yên Dũng    |
| <b>Southeast Asia</b> | Vietnam | Hà Nam   | Kim Bảng     | Vietnam | Bắc Giang | Yên Thế     |
| <b>Southeast Asia</b> | Vietnam | Hà Nam   | Lý Nhân      | Vietnam | Bắc Kạn   | Chợ Mới     |
| <b>Southeast Asia</b> | Vietnam | Hà Nam   | Phủ Lý       | Vietnam | Bắc Ninh  | NA          |
| <b>Southeast Asia</b> | Vietnam | Hà Nam   | Thanh Liêm   | Vietnam | Bắc Ninh  | Bắc Ninh    |
| <b>Southeast Asia</b> | Vietnam | Hà Nội   | NA           | Vietnam | Bắc Ninh  | Gia Bình    |
| <b>Southeast Asia</b> | Vietnam | Hà Nội   | Bắc Từ Liêm  | Vietnam | Bắc Ninh  | Lương Tài   |
| <b>Southeast Asia</b> | Vietnam | Hà Nội   | Gia Lâm      | Vietnam | Bắc Ninh  | Quế Võ      |
| <b>Southeast Asia</b> | Vietnam | Hà Nội   | Hai Bà Trưng | Vietnam | Bắc Ninh  | Thuận Thành |
| <b>Southeast Asia</b> | Vietnam | Hà Nội   | Hoài Đức     | Vietnam | Bắc Ninh  | Tiên Du     |
| <b>Southeast Asia</b> | Vietnam | Hà Nội   | Hoàng Mai    | Vietnam | Bắc Ninh  | Từ Sơn      |
| <b>Southeast Asia</b> | Vietnam | Hà Nội   | Hà Đông      | Vietnam | Bắc Ninh  | Yên Phong   |
| <b>Southeast Asia</b> | Vietnam | Hà Nội   | Long Biên    | Vietnam | Cần Thơ   | NA          |
| <b>Southeast Asia</b> | Vietnam | Hà Nội   | Mê Linh      | Vietnam | Cần Thơ   | Cờ Đỏ       |
| <b>Southeast Asia</b> | Vietnam | Hà Nội   | Mỹ Đức       | Vietnam | Cần Thơ   | Thốt Nốt    |
| <b>Southeast Asia</b> | Vietnam | Hà Nội   | Nam Từ Liêm  | Vietnam | Cần Thơ   | Thới Lai    |
| <b>Southeast Asia</b> | Vietnam | Hà Nội   | Phú Xuyên    | Vietnam | Cần Thơ   | Vĩnh Thạnh  |
| <b>Southeast Asia</b> | Vietnam | Hà Nội   | Sóc Sơn      | Vietnam | Cần Thơ   | Ô Môn       |
| <b>Southeast Asia</b> | Vietnam | Hà Nội   | Thanh Oai    | Vietnam | Hà Nam    | NA          |
| <b>Southeast Asia</b> | Vietnam | Hà Nội   | Thanh Trì    | Vietnam | Hà Nam    | Bình Lục    |
| <b>Southeast Asia</b> | Vietnam | Hà Nội   | Thanh Xuân   | Vietnam | Hà Nam    | Duy Tiên    |
| <b>Southeast Asia</b> | Vietnam | Hà Nội   | Thường Tín   | Vietnam | Hà Nam    | Kim Bảng    |
| <b>Southeast Asia</b> | Vietnam | Hà Nội   | Đan Phượng   | Vietnam | Hà Nam    | Lý Nhân     |
| <b>Southeast Asia</b> | Vietnam | Hà Nội   | Đông Anh     | Vietnam | Hà Nam    | Phủ Lý      |
| <b>Southeast Asia</b> | Vietnam | Hà Nội   | Ứng Hòa      | Vietnam | Hà Nam    | Thanh Liêm  |
| <b>Southeast Asia</b> | Vietnam | Hưng Yên | NA           | Vietnam | Hà Nội    | NA          |
| <b>Southeast Asia</b> | Vietnam | Hưng Yên | Hưng Yên     | Vietnam | Hà Nội    | Bắc Từ Liêm |

|                       |         |            |              |         |            |              |
|-----------------------|---------|------------|--------------|---------|------------|--------------|
| <b>Southeast Asia</b> | Vietnam | Hưng Yên   | Khoái Châu   | Vietnam | Hà Nội     | Gia Lâm      |
| <b>Southeast Asia</b> | Vietnam | Hưng Yên   | Kim Động     | Vietnam | Hà Nội     | Hoài Đức     |
| <b>Southeast Asia</b> | Vietnam | Hưng Yên   | Mỹ Hào       | Vietnam | Hà Nội     | Hà Đông      |
| <b>Southeast Asia</b> | Vietnam | Hưng Yên   | Phù Cừ       | Vietnam | Hà Nội     | Long Biên    |
| <b>Southeast Asia</b> | Vietnam | Hưng Yên   | Tiên Lữ      | Vietnam | Hà Nội     | Mê Linh      |
| <b>Southeast Asia</b> | Vietnam | Hưng Yên   | Văn Giang    | Vietnam | Hà Nội     | Mỹ Đức       |
| <b>Southeast Asia</b> | Vietnam | Hưng Yên   | Văn Lâm      | Vietnam | Hà Nội     | Phú Xuyên    |
| <b>Southeast Asia</b> | Vietnam | Hưng Yên   | Yên Mỹ       | Vietnam | Hà Nội     | Sóc Sơn      |
| <b>Southeast Asia</b> | Vietnam | Hưng Yên   | Ân Thi       | Vietnam | Hà Nội     | Thanh Trì    |
| <b>Southeast Asia</b> | Vietnam | Hải Dương  | Bình Giang   | Vietnam | Hà Nội     | Thường Tín   |
| <b>Southeast Asia</b> | Vietnam | Hải Dương  | Thanh Miện   | Vietnam | Hà Nội     | Đan Phượng   |
| <b>Southeast Asia</b> | Vietnam | Hải Phòng  | NA           | Vietnam | Hà Nội     | Đông Anh     |
| <b>Southeast Asia</b> | Vietnam | Hải Phòng  | An Dương     | Vietnam | Hưng Yên   | NA           |
| <b>Southeast Asia</b> | Vietnam | Hải Phòng  | An Lão       | Vietnam | Hưng Yên   | Khoái Châu   |
| <b>Southeast Asia</b> | Vietnam | Hải Phòng  | Dương Kinh   | Vietnam | Hưng Yên   | Kim Động     |
| <b>Southeast Asia</b> | Vietnam | Hải Phòng  | Hồng Bàng    | Vietnam | Hưng Yên   | Mỹ Hào       |
| <b>Southeast Asia</b> | Vietnam | Hải Phòng  | Kiến An      | Vietnam | Hưng Yên   | Phù Cừ       |
| <b>Southeast Asia</b> | Vietnam | Hải Phòng  | Kiến Thụy    | Vietnam | Hưng Yên   | Tiên Lữ      |
| <b>Southeast Asia</b> | Vietnam | Hải Phòng  | Tiên Lãng    | Vietnam | Hưng Yên   | Văn Giang    |
| <b>Southeast Asia</b> | Vietnam | Hải Phòng  | Vĩnh Bảo     | Vietnam | Hưng Yên   | Văn Lâm      |
| <b>Southeast Asia</b> | Vietnam | Hậu Giang  | NA           | Vietnam | Hưng Yên   | Yên Mỹ       |
| <b>Southeast Asia</b> | Vietnam | Hậu Giang  | Châu Thành   | Vietnam | Hưng Yên   | Ân Thi       |
| <b>Southeast Asia</b> | Vietnam | Hậu Giang  | Châu Thành A | Vietnam | Hải Phòng  | Kiến Thụy    |
| <b>Southeast Asia</b> | Vietnam | Hậu Giang  | Ngã Bảy      | Vietnam | Hậu Giang  | Châu Thành   |
| <b>Southeast Asia</b> | Vietnam | Hậu Giang  | Phụng Hiệp   | Vietnam | Hậu Giang  | Châu Thành A |
| <b>Southeast Asia</b> | Vietnam | Kiên Giang | Giồng Riềng  | Vietnam | Kiên Giang | Tân Hiệp     |
| <b>Southeast Asia</b> | Vietnam | Kiên Giang | Tân Hiệp     | Vietnam | Long An    | NA           |
| <b>Southeast Asia</b> | Vietnam | Long An    | Bến Lức      | Vietnam | Long An    | Kiến Tường   |
| <b>Southeast Asia</b> | Vietnam | Long An    | Tân Hưng     | Vietnam | Long An    | Tân Hưng     |

|                       |         |             |             |         |             |             |
|-----------------------|---------|-------------|-------------|---------|-------------|-------------|
| <b>Southeast Asia</b> | Vietnam | Nam Định    | Mỹ Lộc      | Vietnam | Long An     | Tân Thạnh   |
| <b>Southeast Asia</b> | Vietnam | Nam Định    | Ý Yên       | Vietnam | Long An     | Vĩnh Hưng   |
| <b>Southeast Asia</b> | Vietnam | Ninh Bình   | NA          | Vietnam | Ninh Bình   | Gia Viễn    |
| <b>Southeast Asia</b> | Vietnam | Ninh Bình   | Gia Viễn    | Vietnam | Ninh Bình   | Hoa Lư      |
| <b>Southeast Asia</b> | Vietnam | Ninh Bình   | Hoa Lư      | Vietnam | Ninh Bình   | Nho Quan    |
| <b>Southeast Asia</b> | Vietnam | Ninh Bình   | Nho Quan    | Vietnam | Sóc Trăng   | NA          |
| <b>Southeast Asia</b> | Vietnam | Ninh Bình   | Ninh Bình   | Vietnam | Sóc Trăng   | Châu Thành  |
| <b>Southeast Asia</b> | Vietnam | Ninh Bình   | Tam Điệp    | Vietnam | Sóc Trăng   | Kế Sách     |
| <b>Southeast Asia</b> | Vietnam | Ninh Bình   | Yên Mô      | Vietnam | Sóc Trăng   | Long Phú    |
| <b>Southeast Asia</b> | Vietnam | Sóc Trăng   | NA          | Vietnam | Sóc Trăng   | Sóc Trăng   |
| <b>Southeast Asia</b> | Vietnam | Sóc Trăng   | Châu Thành  | Vietnam | Sóc Trăng   | Trần Đề     |
| <b>Southeast Asia</b> | Vietnam | Sóc Trăng   | Cù Lao Dung | Vietnam | Thái Bình   | Hưng Hà     |
| <b>Southeast Asia</b> | Vietnam | Sóc Trăng   | Kế Sách     | Vietnam | Thái Nguyên | NA          |
| <b>Southeast Asia</b> | Vietnam | Sóc Trăng   | Long Phú    | Vietnam | Thái Nguyên | Phú Bình    |
| <b>Southeast Asia</b> | Vietnam | Sóc Trăng   | Mỹ Tú       | Vietnam | Thái Nguyên | Phú Lương   |
| <b>Southeast Asia</b> | Vietnam | Sóc Trăng   | Mỹ Xuyên    | Vietnam | Thái Nguyên | Phổ Yên     |
| <b>Southeast Asia</b> | Vietnam | Sóc Trăng   | Sóc Trăng   | Vietnam | Thái Nguyên | Sông Công   |
| <b>Southeast Asia</b> | Vietnam | Sóc Trăng   | Trần Đề     | Vietnam | Thái Nguyên | Thái Nguyên |
| <b>Southeast Asia</b> | Vietnam | Thái Bình   | NA          | Vietnam | Thái Nguyên | Võ Nhai     |
| <b>Southeast Asia</b> | Vietnam | Thái Bình   | Hưng Hà     | Vietnam | Thái Nguyên | Đại Từ      |
| <b>Southeast Asia</b> | Vietnam | Thái Bình   | Kiến Xương  | Vietnam | Thái Nguyên | Định Hóa    |
| <b>Southeast Asia</b> | Vietnam | Thái Bình   | Quỳnh Phụ   | Vietnam | Thái Nguyên | Đồng Hỷ     |
| <b>Southeast Asia</b> | Vietnam | Thái Bình   | Thái Bình   | Vietnam | Trà Vinh    | Càng Long   |
| <b>Southeast Asia</b> | Vietnam | Thái Bình   | Thái Thụy   | Vietnam | Trà Vinh    | Cầu Kè      |
| <b>Southeast Asia</b> | Vietnam | Thái Bình   | Tiền Hải    | Vietnam | Trà Vinh    | Tiểu Cần    |
| <b>Southeast Asia</b> | Vietnam | Thái Bình   | Đông Hưng   | Vietnam | Vĩnh Long   | NA          |
| <b>Southeast Asia</b> | Vietnam | Thái Nguyên | NA          | Vietnam | Vĩnh Long   | Bình Tân    |
| <b>Southeast Asia</b> | Vietnam | Thái Nguyên | Phú Bình    | Vietnam | Vĩnh Long   | Long Hồ     |
| <b>Southeast Asia</b> | Vietnam | Thái Nguyên | Phú Lương   | Vietnam | Vĩnh Long   | Mang Thít   |

|                       |         |             |             |         |           |                      |
|-----------------------|---------|-------------|-------------|---------|-----------|----------------------|
| <b>Southeast Asia</b> | Vietnam | Thái Nguyên | Phổ Yên     | Vietnam | Vĩnh Long | Tam Bình             |
| <b>Southeast Asia</b> | Vietnam | Thái Nguyên | Sông Công   | Vietnam | Vĩnh Long | Trà Ôn               |
| <b>Southeast Asia</b> | Vietnam | Thái Nguyên | Thái Nguyên | Vietnam | Vĩnh Long | Vũng Liêm            |
| <b>Southeast Asia</b> | Vietnam | Thái Nguyên | Võ Nhai     | Vietnam | Vĩnh Phúc | NA                   |
| <b>Southeast Asia</b> | Vietnam | Thái Nguyên | Đại Từ      | Vietnam | Vĩnh Phúc | Bình Xuyên           |
| <b>Southeast Asia</b> | Vietnam | Thái Nguyên | Định Hóa    | Vietnam | Vĩnh Phúc | Phúc Yên             |
| <b>Southeast Asia</b> | Vietnam | Thái Nguyên | Đồng Hỷ     | Vietnam | Vĩnh Phúc | Tam Dương            |
| <b>Southeast Asia</b> | Vietnam | Trà Vinh    | NA          | Vietnam | Vĩnh Phúc | Tam Đảo              |
| <b>Southeast Asia</b> | Vietnam | Trà Vinh    | Châu Thành  | Vietnam | Vĩnh Phúc | Vĩnh Yên             |
| <b>Southeast Asia</b> | Vietnam | Trà Vinh    | Càng Long   | Vietnam | Đồng Tháp | NA                   |
| <b>Southeast Asia</b> | Vietnam | Trà Vinh    | Cầu Kè      | Vietnam | Đồng Tháp | Cao Lãnh             |
| <b>Southeast Asia</b> | Vietnam | Trà Vinh    | Cầu Ngang   | Vietnam | Đồng Tháp | Cao Lãnh (Thành phố) |
| <b>Southeast Asia</b> | Vietnam | Trà Vinh    | Tiểu Cần    | Vietnam | Đồng Tháp | Châu Thành           |
| <b>Southeast Asia</b> | Vietnam | Trà Vinh    | Trà Cú      | Vietnam | Đồng Tháp | Hồng Ngự             |
| <b>Southeast Asia</b> | Vietnam | Trà Vinh    | Trà Vinh    | Vietnam | Đồng Tháp | Hồng Ngự (Thị xã)    |
| <b>Southeast Asia</b> | Vietnam | Vĩnh Long   | NA          | Vietnam | Đồng Tháp | Lai Vung             |
| <b>Southeast Asia</b> | Vietnam | Vĩnh Long   | Bình Minh   | Vietnam | Đồng Tháp | Lấp Vò               |
| <b>Southeast Asia</b> | Vietnam | Vĩnh Long   | Bình Tân    | Vietnam | Đồng Tháp | Sa Đéc               |
| <b>Southeast Asia</b> | Vietnam | Vĩnh Long   | Long Hồ     | Vietnam | Đồng Tháp | Tam Nông             |
| <b>Southeast Asia</b> | Vietnam | Vĩnh Long   | Mang Thít   | Vietnam | Đồng Tháp | Thanh Bình           |
| <b>Southeast Asia</b> | Vietnam | Vĩnh Long   | Tam Bình    | Vietnam | Đồng Tháp | Tháp Mười            |
| <b>Southeast Asia</b> | Vietnam | Vĩnh Long   | Trà Ôn      | Vietnam | Đồng Tháp | Tân Hồng             |
| <b>Southeast Asia</b> | Vietnam | Vĩnh Long   | Vĩnh Long   | NA      | NA        | NA                   |
| <b>Southeast Asia</b> | Vietnam | Vĩnh Long   | Vũng Liêm   | NA      | NA        | NA                   |
| <b>Southeast Asia</b> | Vietnam | Vĩnh Phúc   | Bình Xuyên  | NA      | NA        | NA                   |
| <b>Southeast Asia</b> | Vietnam | Vĩnh Phúc   | Phúc Yên    | NA      | NA        | NA                   |
| <b>Southeast Asia</b> | Vietnam | Vĩnh Phúc   | Vĩnh Yên    | NA      | NA        | NA                   |
| <b>Southeast Asia</b> | Vietnam | Đồng Tháp   | NA          | NA      | NA        | NA                   |

|                               |         |           |                      |        |       |                      |
|-------------------------------|---------|-----------|----------------------|--------|-------|----------------------|
| <b>Southeast Asia</b>         | Vietnam | Đồng Tháp | Cao Lãnh             | NA     | NA    | NA                   |
| <b>Southeast Asia</b>         | Vietnam | Đồng Tháp | Cao Lãnh (Thành phố) | NA     | NA    | NA                   |
| <b>Southeast Asia</b>         | Vietnam | Đồng Tháp | Châu Thành           | NA     | NA    | NA                   |
| <b>Southeast Asia</b>         | Vietnam | Đồng Tháp | Hồng Ngự             | NA     | NA    | NA                   |
| <b>Southeast Asia</b>         | Vietnam | Đồng Tháp | Hồng Ngự (Thị xã)    | NA     | NA    | NA                   |
| <b>Southeast Asia</b>         | Vietnam | Đồng Tháp | Lai Vung             | NA     | NA    | NA                   |
| <b>Southeast Asia</b>         | Vietnam | Đồng Tháp | Lấp Vò               | NA     | NA    | NA                   |
| <b>Southeast Asia</b>         | Vietnam | Đồng Tháp | Sa Đéc               | NA     | NA    | NA                   |
| <b>Southeast Asia</b>         | Vietnam | Đồng Tháp | Tam Nông             | NA     | NA    | NA                   |
| <b>Southeast Asia</b>         | Vietnam | Đồng Tháp | Thanh Bình           | NA     | NA    | NA                   |
| <b>Southeast Asia</b>         | Vietnam | Đồng Tháp | Tháp Mười            | NA     | NA    | NA                   |
| <b>Southeast Asia</b>         | Vietnam | Đồng Tháp | Tân Hồng             | NA     | NA    | NA                   |
| <b>Tropical South America</b> | Brazil  | Piauí     | NA                   | Brazil | Piauí | NA                   |
| <b>Tropical South America</b> | Brazil  | Piauí     | Acauã                | Brazil | Piauí | Acauã                |
| <b>Tropical South America</b> | Brazil  | Piauí     | Agricolândia         | Brazil | Piauí | Agricolândia         |
| <b>Tropical South America</b> | Brazil  | Piauí     | Alagoinha do Piauí   | Brazil | Piauí | Alagoinha do Piauí   |
| <b>Tropical South America</b> | Brazil  | Piauí     | Alegrete do Piauí    | Brazil | Piauí | Alegrete do Piauí    |
| <b>Tropical South America</b> | Brazil  | Piauí     | Alto Longá           | Brazil | Piauí | Alto Longá           |
| <b>Tropical South America</b> | Brazil  | Piauí     | Altos                | Brazil | Piauí | Altos                |
| <b>Tropical South America</b> | Brazil  | Piauí     | Alvorada do Gurguéia | Brazil | Piauí | Alvorada do Gurguéia |
| <b>Tropical South America</b> | Brazil  | Piauí     | Amarante             | Brazil | Piauí | Angical do Piauí     |

|                               |        |       |                         |        |       |                         |
|-------------------------------|--------|-------|-------------------------|--------|-------|-------------------------|
| <b>Tropical South America</b> | Brazil | Piauí | Angical do Piauí        | Brazil | Piauí | Antônio Almeida         |
| <b>Tropical South America</b> | Brazil | Piauí | Antônio Almeida         | Brazil | Piauí | Anísio de Abreu         |
| <b>Tropical South America</b> | Brazil | Piauí | Anísio de Abreu         | Brazil | Piauí | Aroazes                 |
| <b>Tropical South America</b> | Brazil | Piauí | Aroazes                 | Brazil | Piauí | Arraial                 |
| <b>Tropical South America</b> | Brazil | Piauí | Arraial                 | Brazil | Piauí | Avelino Lopes           |
| <b>Tropical South America</b> | Brazil | Piauí | Avelino Lopes           | Brazil | Piauí | Baixa Grande do Ribeiro |
| <b>Tropical South America</b> | Brazil | Piauí | Baixa Grande do Ribeiro | Brazil | Piauí | Barra d'Alcântara       |
| <b>Tropical South America</b> | Brazil | Piauí | Barra d'Alcântara       | Brazil | Piauí | Barras                  |
| <b>Tropical South America</b> | Brazil | Piauí | Barras                  | Brazil | Piauí | Barreiras do Piauí      |
| <b>Tropical South America</b> | Brazil | Piauí | Barreiras do Piauí      | Brazil | Piauí | Barro Duro              |
| <b>Tropical South America</b> | Brazil | Piauí | Barro Duro              | Brazil | Piauí | Batalha                 |
| <b>Tropical South America</b> | Brazil | Piauí | Batalha                 | Brazil | Piauí | Belém do Piauí          |
| <b>Tropical South America</b> | Brazil | Piauí | Bela Vista do Piauí     | Brazil | Piauí | Beneditinos             |
| <b>Tropical South America</b> | Brazil | Piauí | Belém do Piauí          | Brazil | Piauí | Bertolândia             |
| <b>Tropical South America</b> | Brazil | Piauí | Beneditinos             | Brazil | Piauí | Boa Hora                |



|                               |        |       |                           |        |       |                           |
|-------------------------------|--------|-------|---------------------------|--------|-------|---------------------------|
| <b>Tropical South America</b> | Brazil | Piauí | Bertolândia               | Brazil | Piauí | Bocaina                   |
| <b>Tropical South America</b> | Brazil | Piauí | Betânia do Piauí          | Brazil | Piauí | Bom Jesus                 |
| <b>Tropical South America</b> | Brazil | Piauí | Boa Hora                  | Brazil | Piauí | Bonfim do Piauí           |
| <b>Tropical South America</b> | Brazil | Piauí | Bocaina                   | Brazil | Piauí | Boqueirão do Piauí        |
| <b>Tropical South America</b> | Brazil | Piauí | Bom Jesus                 | Brazil | Piauí | Brazileira                |
| <b>Tropical South America</b> | Brazil | Piauí | Bonfim do Piauí           | Brazil | Piauí | Buriti dos Montes         |
| <b>Tropical South America</b> | Brazil | Piauí | Boqueirão do Piauí        | Brazil | Piauí | Cabeceiras do Piauí       |
| <b>Tropical South America</b> | Brazil | Piauí | Brazileira                | Brazil | Piauí | Caldeirão Grande do Piauí |
| <b>Tropical South America</b> | Brazil | Piauí | Brejo do Piauí            | Brazil | Piauí | Campinas do Piauí         |
| <b>Tropical South America</b> | Brazil | Piauí | Buriti dos Lopes          | Brazil | Piauí | Campo Grande do Piauí     |
| <b>Tropical South America</b> | Brazil | Piauí | Buriti dos Montes         | Brazil | Piauí | Campo Largo do Piauí      |
| <b>Tropical South America</b> | Brazil | Piauí | Cabeceiras do Piauí       | Brazil | Piauí | Campo Maior               |
| <b>Tropical South America</b> | Brazil | Piauí | Cajazeiras do Piauí       | Brazil | Piauí | Canavieira                |
| <b>Tropical South America</b> | Brazil | Piauí | Caldeirão Grande do Piauí | Brazil | Piauí | Canto do Buriti           |
| <b>Tropical South America</b> | Brazil | Piauí | Campinas do Piauí         | Brazil | Piauí | Capitão de Campos         |

|                               |        |       |                           |        |       |                       |
|-------------------------------|--------|-------|---------------------------|--------|-------|-----------------------|
| <b>Tropical South America</b> | Brazil | Piauí | Campo Alegre do Fidalgo   | Brazil | Piauí | Caracol               |
| <b>Tropical South America</b> | Brazil | Piauí | Campo Grande do Piauí     | Brazil | Piauí | Castelo do Piauí      |
| <b>Tropical South America</b> | Brazil | Piauí | Campo Largo do Piauí      | Brazil | Piauí | Coivaras              |
| <b>Tropical South America</b> | Brazil | Piauí | Campo Maior               | Brazil | Piauí | Colônia do Gurguéia   |
| <b>Tropical South America</b> | Brazil | Piauí | Canavieira                | Brazil | Piauí | Colônia do Piauí      |
| <b>Tropical South America</b> | Brazil | Piauí | Canto do Buriti           | Brazil | Piauí | Conceição do Canindé  |
| <b>Tropical South America</b> | Brazil | Piauí | Capitão Gervásio Oliveira | Brazil | Piauí | Coronel José Dias     |
| <b>Tropical South America</b> | Brazil | Piauí | Capitão de Campos         | Brazil | Piauí | Corrente              |
| <b>Tropical South America</b> | Brazil | Piauí | Caracol                   | Brazil | Piauí | Cristalândia do Piauí |
| <b>Tropical South America</b> | Brazil | Piauí | Caraúbas do Piauí         | Brazil | Piauí | Cristino Castro       |
| <b>Tropical South America</b> | Brazil | Piauí | Caridade do Piauí         | Brazil | Piauí | Curimatá              |
| <b>Tropical South America</b> | Brazil | Piauí | Castelo do Piauí          | Brazil | Piauí | Currais               |
| <b>Tropical South America</b> | Brazil | Piauí | Cocal                     | Brazil | Piauí | Demerval Lobão        |
| <b>Tropical South America</b> | Brazil | Piauí | Cocal de Telha            | Brazil | Piauí | Dirceu Arcoverde      |
| <b>Tropical South America</b> | Brazil | Piauí | Cocal dos Alves           | Brazil | Piauí | Dom Expedito Lopes    |

|                               |        |       |                       |        |       |                   |
|-------------------------------|--------|-------|-----------------------|--------|-------|-------------------|
| <b>Tropical South America</b> | Brazil | Piauí | Coivaras              | Brazil | Piauí | Dom Inocêncio     |
| <b>Tropical South America</b> | Brazil | Piauí | Colônia do Gurguéia   | Brazil | Piauí | Domingos Mourão   |
| <b>Tropical South America</b> | Brazil | Piauí | Colônia do Piauí      | Brazil | Piauí | Elesbão Veloso    |
| <b>Tropical South America</b> | Brazil | Piauí | Conceição do Canindé  | Brazil | Piauí | Eliseu Martins    |
| <b>Tropical South America</b> | Brazil | Piauí | Coronel José Dias     | Brazil | Piauí | Esperantina       |
| <b>Tropical South America</b> | Brazil | Piauí | Corrente              | Brazil | Piauí | Fartura do Piauí  |
| <b>Tropical South America</b> | Brazil | Piauí | Cristalândia do Piauí | Brazil | Piauí | Flores do Piauí   |
| <b>Tropical South America</b> | Brazil | Piauí | Cristino Castro       | Brazil | Piauí | Floresta do Piauí |
| <b>Tropical South America</b> | Brazil | Piauí | Curimatá              | Brazil | Piauí | Floriano          |
| <b>Tropical South America</b> | Brazil | Piauí | Currais               | Brazil | Piauí | Francinópolis     |
| <b>Tropical South America</b> | Brazil | Piauí | Curral Novo do Piauí  | Brazil | Piauí | Francisco Ayres   |
| <b>Tropical South America</b> | Brazil | Piauí | Curralinhos           | Brazil | Piauí | Francisco Santos  |
| <b>Tropical South America</b> | Brazil | Piauí | Demerval Lobão        | Brazil | Piauí | Fronteiras        |
| <b>Tropical South America</b> | Brazil | Piauí | Dirceu Arcoverde      | Brazil | Piauí | Geminiano         |
| <b>Tropical South America</b> | Brazil | Piauí | Dom Expedito Lopes    | Brazil | Piauí | Gilbués           |

|                               |        |       |                   |        |       |                   |
|-------------------------------|--------|-------|-------------------|--------|-------|-------------------|
| <b>Tropical South America</b> | Brazil | Piauí | Dom Inocêncio     | Brazil | Piauí | Guadalupe         |
| <b>Tropical South America</b> | Brazil | Piauí | Domingos Mourão   | Brazil | Piauí | Guaribas          |
| <b>Tropical South America</b> | Brazil | Piauí | Elesbão Veloso    | Brazil | Piauí | Hugo Napoleão     |
| <b>Tropical South America</b> | Brazil | Piauí | Eliseu Martins    | Brazil | Piauí | Inhuma            |
| <b>Tropical South America</b> | Brazil | Piauí | Esperantina       | Brazil | Piauí | Ipiranga do Piauí |
| <b>Tropical South America</b> | Brazil | Piauí | Fartura do Piauí  | Brazil | Piauí | Isaías Coelho     |
| <b>Tropical South America</b> | Brazil | Piauí | Flores do Piauí   | Brazil | Piauí | Itainópolis       |
| <b>Tropical South America</b> | Brazil | Piauí | Floresta do Piauí | Brazil | Piauí | Itaueira          |
| <b>Tropical South America</b> | Brazil | Piauí | Floriano          | Brazil | Piauí | Jacobina do Piauí |
| <b>Tropical South America</b> | Brazil | Piauí | Francinópolis     | Brazil | Piauí | Jaicós            |
| <b>Tropical South America</b> | Brazil | Piauí | Francisco Ayres   | Brazil | Piauí | Jardim do Mulato  |
| <b>Tropical South America</b> | Brazil | Piauí | Francisco Macêdo  | Brazil | Piauí | Jerumenha         |
| <b>Tropical South America</b> | Brazil | Piauí | Francisco Santos  | Brazil | Piauí | José de Freitas   |
| <b>Tropical South America</b> | Brazil | Piauí | Fronteiras        | Brazil | Piauí | Juazeiro do Piauí |
| <b>Tropical South America</b> | Brazil | Piauí | Geminiano         | Brazil | Piauí | Jurema            |

|                               |        |       |                   |        |       |                         |
|-------------------------------|--------|-------|-------------------|--------|-------|-------------------------|
| <b>Tropical South America</b> | Brazil | Piauí | Gilbués           | Brazil | Piauí | Júlio Borges            |
| <b>Tropical South America</b> | Brazil | Piauí | Guadalupe         | Brazil | Piauí | Lagoa Alegre            |
| <b>Tropical South America</b> | Brazil | Piauí | Guaribas          | Brazil | Piauí | Lagoa de São Francisco  |
| <b>Tropical South America</b> | Brazil | Piauí | Hugo Napoleão     | Brazil | Piauí | Lagoa do Barro do Piauí |
| <b>Tropical South America</b> | Brazil | Piauí | Inhuma            | Brazil | Piauí | Lagoa do Piauí          |
| <b>Tropical South America</b> | Brazil | Piauí | Ipiranga do Piauí | Brazil | Piauí | Lagoa do Sítio          |
| <b>Tropical South America</b> | Brazil | Piauí | Isaías Coelho     | Brazil | Piauí | Lagoinha do Piauí       |
| <b>Tropical South America</b> | Brazil | Piauí | Itainópolis       | Brazil | Piauí | Landri Sales            |
| <b>Tropical South America</b> | Brazil | Piauí | Itaueira          | Brazil | Piauí | Manoel Emídio           |
| <b>Tropical South America</b> | Brazil | Piauí | Jacobina do Piauí | Brazil | Piauí | Marcolândia             |
| <b>Tropical South America</b> | Brazil | Piauí | Jaicós            | Brazil | Piauí | Marcos Parente          |
| <b>Tropical South America</b> | Brazil | Piauí | Jardim do Mulato  | Brazil | Piauí | Miguel Leão             |
| <b>Tropical South America</b> | Brazil | Piauí | Jatobá do Piauí   | Brazil | Piauí | Milton Brandão          |
| <b>Tropical South America</b> | Brazil | Piauí | Jerumenha         | Brazil | Piauí | Monsenhor Gil           |
| <b>Tropical South America</b> | Brazil | Piauí | Joaquim Pires     | Brazil | Piauí | Monsenhor Hipólito      |

|                               |        |       |                         |        |       |                          |
|-------------------------------|--------|-------|-------------------------|--------|-------|--------------------------|
| <b>Tropical South America</b> | Brazil | Piauí | Joca Marques            | Brazil | Piauí | Monte Alegre do Piauí    |
| <b>Tropical South America</b> | Brazil | Piauí | José de Freitas         | Brazil | Piauí | Morro Cabeça No Tempo    |
| <b>Tropical South America</b> | Brazil | Piauí | Juazeiro do Piauí       | Brazil | Piauí | Morro do Chapéu do Piauí |
| <b>Tropical South America</b> | Brazil | Piauí | Jurema                  | Brazil | Piauí | Nazaré do Piauí          |
| <b>Tropical South America</b> | Brazil | Piauí | Júlio Borges            | Brazil | Piauí | Novo Oriente do Piauí    |
| <b>Tropical South America</b> | Brazil | Piauí | Lagoa Alegre            | Brazil | Piauí | Novo Santo Antônio       |
| <b>Tropical South America</b> | Brazil | Piauí | Lagoa de São Francisco  | Brazil | Piauí | Oeiras                   |
| <b>Tropical South America</b> | Brazil | Piauí | Lagoa do Barro do Piauí | Brazil | Piauí | Olho d'água do Piauí     |
| <b>Tropical South America</b> | Brazil | Piauí | Lagoa do Piauí          | Brazil | Piauí | Padre Marcos             |
| <b>Tropical South America</b> | Brazil | Piauí | Lagoa do Sítio          | Brazil | Piauí | Paes Landim              |
| <b>Tropical South America</b> | Brazil | Piauí | Lagoinha do Piauí       | Brazil | Piauí | Palmeira do Piauí        |
| <b>Tropical South America</b> | Brazil | Piauí | Landri Sales            | Brazil | Piauí | Palmeirais               |
| <b>Tropical South America</b> | Brazil | Piauí | Luzilândia              | Brazil | Piauí | Paquetá                  |
| <b>Tropical South America</b> | Brazil | Piauí | Madeiro                 | Brazil | Piauí | Parnaguá                 |
| <b>Tropical South America</b> | Brazil | Piauí | Manoel Emídio           | Brazil | Piauí | Passagem Franca do Piauí |

|                               |        |       |                            |        |       |                       |
|-------------------------------|--------|-------|----------------------------|--------|-------|-----------------------|
| <b>Tropical South America</b> | Brazil | Piauí | Marcolândia                | Brazil | Piauí | Patos do Piauí        |
| <b>Tropical South America</b> | Brazil | Piauí | Marcos Parente             | Brazil | Piauí | Paulistana            |
| <b>Tropical South America</b> | Brazil | Piauí | Massapê do Piauí           | Brazil | Piauí | Pavussu               |
| <b>Tropical South America</b> | Brazil | Piauí | Matias Olímpio             | Brazil | Piauí | Pedro Li              |
| <b>Tropical South America</b> | Brazil | Piauí | Miguel Alves               | Brazil | Piauí | Picos                 |
| <b>Tropical South America</b> | Brazil | Piauí | Miguel Leão                | Brazil | Piauí | Pimenteiras           |
| <b>Tropical South America</b> | Brazil | Piauí | Milton Brandão             | Brazil | Piauí | Pio IX                |
| <b>Tropical South America</b> | Brazil | Piauí | Monsenhor Gil              | Brazil | Piauí | Piripiri              |
| <b>Tropical South America</b> | Brazil | Piauí | Monsenhor Hipólito         | Brazil | Piauí | Porto Alegre do Piauí |
| <b>Tropical South America</b> | Brazil | Piauí | Monte Alegre do Piauí      | Brazil | Piauí | Prata do Piauí        |
| <b>Tropical South America</b> | Brazil | Piauí | Morro Cabeça No Tempo      | Brazil | Piauí | Queimada Nova         |
| <b>Tropical South America</b> | Brazil | Piauí | Morro do Chapéu do Piauí   | Brazil | Piauí | Redenção do Gurguéia  |
| <b>Tropical South America</b> | Brazil | Piauí | Nazaré do Piauí            | Brazil | Piauí | Regeneração           |
| <b>Tropical South America</b> | Brazil | Piauí | Nossa Senhora de Nazaré    | Brazil | Piauí | Riacho Frio           |
| <b>Tropical South America</b> | Brazil | Piauí | Nossa Senhora dos Remédios | Brazil | Piauí | Ribeiro Gonçalves     |

|                               |        |       |                          |        |       |                            |
|-------------------------------|--------|-------|--------------------------|--------|-------|----------------------------|
| <b>Tropical South America</b> | Brazil | Piauí | Nova Santa Rita          | Brazil | Piauí | Rio Grande do Piauí        |
| <b>Tropical South America</b> | Brazil | Piauí | Novo Oriente do Piauí    | Brazil | Piauí | Santa Cruz dos Milagres    |
| <b>Tropical South America</b> | Brazil | Piauí | Novo Santo Antônio       | Brazil | Piauí | Santa Filomena             |
| <b>Tropical South America</b> | Brazil | Piauí | Oeiras                   | Brazil | Piauí | Santa Luz                  |
| <b>Tropical South America</b> | Brazil | Piauí | Olho d'água do Piauí     | Brazil | Piauí | Santa Rosa do Piauí        |
| <b>Tropical South America</b> | Brazil | Piauí | Padre Marcos             | Brazil | Piauí | Santana do Piauí           |
| <b>Tropical South America</b> | Brazil | Piauí | Paes Landim              | Brazil | Piauí | Santo Antônio de Lisboa    |
| <b>Tropical South America</b> | Brazil | Piauí | Pajeú do Piauí           | Brazil | Piauí | Santo Antônio dos Milagres |
| <b>Tropical South America</b> | Brazil | Piauí | Palmeira do Piauí        | Brazil | Piauí | Santo Inácio do Piauí      |
| <b>Tropical South America</b> | Brazil | Piauí | Palmeirais               | Brazil | Piauí | Sebastião Barros           |
| <b>Tropical South America</b> | Brazil | Piauí | Paquetá                  | Brazil | Piauí | Sebastião Leal             |
| <b>Tropical South America</b> | Brazil | Piauí | Parnaguá                 | Brazil | Piauí | Sigefredo Pacheco          |
| <b>Tropical South America</b> | Brazil | Piauí | Parnaíba                 | Brazil | Piauí | Simões                     |
| <b>Tropical South America</b> | Brazil | Piauí | Passagem Franca do Piauí | Brazil | Piauí | Socorro do Piauí           |
| <b>Tropical South America</b> | Brazil | Piauí | Patos do Piauí           | Brazil | Piauí | Sussuapara                 |



|                               |        |       |                       |        |       |                         |
|-------------------------------|--------|-------|-----------------------|--------|-------|-------------------------|
| <b>Tropical South America</b> | Brazil | Piauí | Paulistana            | Brazil | Piauí | São Braz do Piauí       |
| <b>Tropical South America</b> | Brazil | Piauí | Pavussu               | Brazil | Piauí | São Francisco do Piauí  |
| <b>Tropical South America</b> | Brazil | Piauí | Pedro Laurentino      | Brazil | Piauí | São Félix do Piauí      |
| <b>Tropical South America</b> | Brazil | Piauí | Pedro Li              | Brazil | Piauí | São Gonçalo do Gurguéia |
| <b>Tropical South America</b> | Brazil | Piauí | Picos                 | Brazil | Piauí | São Gonçalo do Piauí    |
| <b>Tropical South America</b> | Brazil | Piauí | Pimenteiras           | Brazil | Piauí | São José do Divino      |
| <b>Tropical South America</b> | Brazil | Piauí | Pio IX                | Brazil | Piauí | São José do Peixe       |
| <b>Tropical South America</b> | Brazil | Piauí | Piracuruca            | Brazil | Piauí | São José do Piauí       |
| <b>Tropical South America</b> | Brazil | Piauí | Piripiri              | Brazil | Piauí | São João Piau           |
| <b>Tropical South America</b> | Brazil | Piauí | Porto                 | Brazil | Piauí | São João da Canabrava   |
| <b>Tropical South America</b> | Brazil | Piauí | Porto Alegre do Piauí | Brazil | Piauí | São João da Serra       |
| <b>Tropical South America</b> | Brazil | Piauí | Prata do Piauí        | Brazil | Piauí | São João da Varjota     |
| <b>Tropical South America</b> | Brazil | Piauí | Queimada Nova         | Brazil | Piauí | São Juliao              |
| <b>Tropical South America</b> | Brazil | Piauí | Redenção do Gurguéia  | Brazil | Piauí | São Lourenço do Piauí   |
| <b>Tropical South America</b> | Brazil | Piauí | Regeneração           | Brazil | Piauí | São Luis do Piauí       |

|                               |        |       |                            |        |       |                            |
|-------------------------------|--------|-------|----------------------------|--------|-------|----------------------------|
| <b>Tropical South America</b> | Brazil | Piauí | Riacho Frio                | Brazil | Piauí | São Miguel Tapuio          |
| <b>Tropical South America</b> | Brazil | Piauí | Ribeira do Piauí           | Brazil | Piauí | São Miguel da Baixa Grande |
| <b>Tropical South America</b> | Brazil | Piauí | Ribeiro Gonçalves          | Brazil | Piauí | São Miguel do Fidalgo      |
| <b>Tropical South America</b> | Brazil | Piauí | Rio Grande do Piauí        | Brazil | Piauí | São Pedro do Piauí         |
| <b>Tropical South America</b> | Brazil | Piauí | Santa Cruz do Piauí        | Brazil | Piauí | São Raimundo Nonato        |
| <b>Tropical South America</b> | Brazil | Piauí | Santa Cruz dos Milagres    | Brazil | Piauí | Tanque do Piauí            |
| <b>Tropical South America</b> | Brazil | Piauí | Santa Filomena             | Brazil | Piauí | Teresina                   |
| <b>Tropical South America</b> | Brazil | Piauí | Santa Luz                  | Brazil | Piauí | União                      |
| <b>Tropical South America</b> | Brazil | Piauí | Santa Rosa do Piauí        | Brazil | Piauí | Uruçuí                     |
| <b>Tropical South America</b> | Brazil | Piauí | Santana do Piauí           | Brazil | Piauí | Valença do Piauí           |
| <b>Tropical South America</b> | Brazil | Piauí | Santo Antônio de Lisboa    | Brazil | Piauí | Vila Nova do Piauí         |
| <b>Tropical South America</b> | Brazil | Piauí | Santo Antônio dos Milagres | Brazil | Piauí | Várzea Grande              |
| <b>Tropical South America</b> | Brazil | Piauí | Santo Inácio do Piauí      | Brazil | Piauí | Wall Ferraz                |
| <b>Tropical South America</b> | Brazil | Piauí | Sebastião Barros           | Brazil | Piauí | Água Branca                |
| <b>Tropical South America</b> | Brazil | Piauí | Sebastião Leal             | NA     | NA    | NA                         |

|                               |        |       |                                 |    |    |    |
|-------------------------------|--------|-------|---------------------------------|----|----|----|
| <b>Tropical South America</b> | Brazil | Piauí | Sigefredo Pacheco               | NA | NA | NA |
| <b>Tropical South America</b> | Brazil | Piauí | Simplício Mendes                | NA | NA | NA |
| <b>Tropical South America</b> | Brazil | Piauí | Simões                          | NA | NA | NA |
| <b>Tropical South America</b> | Brazil | Piauí | Socorro do Piauí                | NA | NA | NA |
| <b>Tropical South America</b> | Brazil | Piauí | Sussuapara                      | NA | NA | NA |
| <b>Tropical South America</b> | Brazil | Piauí | São Braz do Piauí               | NA | NA | NA |
| <b>Tropical South America</b> | Brazil | Piauí | São Francisco de Assis do Piauí | NA | NA | NA |
| <b>Tropical South America</b> | Brazil | Piauí | São Francisco do Piauí          | NA | NA | NA |
| <b>Tropical South America</b> | Brazil | Piauí | São Félix do Piauí              | NA | NA | NA |
| <b>Tropical South America</b> | Brazil | Piauí | São Gonçalo do Gurguéia         | NA | NA | NA |
| <b>Tropical South America</b> | Brazil | Piauí | São Gonçalo do Piauí            | NA | NA | NA |
| <b>Tropical South America</b> | Brazil | Piauí | São José do Divino              | NA | NA | NA |
| <b>Tropical South America</b> | Brazil | Piauí | São José do Peixe               | NA | NA | NA |
| <b>Tropical South America</b> | Brazil | Piauí | São José do Piauí               | NA | NA | NA |
| <b>Tropical South America</b> | Brazil | Piauí | São João Piauí                  | NA | NA | NA |

|                               |        |       |                            |    |    |    |
|-------------------------------|--------|-------|----------------------------|----|----|----|
| <b>Tropical South America</b> | Brazil | Piauí | São João da Canabrava      | NA | NA | NA |
| <b>Tropical South America</b> | Brazil | Piauí | São João da Fronteira      | NA | NA | NA |
| <b>Tropical South America</b> | Brazil | Piauí | São João da Serra          | NA | NA | NA |
| <b>Tropical South America</b> | Brazil | Piauí | São João da Varjota        | NA | NA | NA |
| <b>Tropical South America</b> | Brazil | Piauí | São João do Arraial        | NA | NA | NA |
| <b>Tropical South America</b> | Brazil | Piauí | São Juliao                 | NA | NA | NA |
| <b>Tropical South America</b> | Brazil | Piauí | São Lourenço do Piauí      | NA | NA | NA |
| <b>Tropical South America</b> | Brazil | Piauí | São Luis do Piauí          | NA | NA | NA |
| <b>Tropical South America</b> | Brazil | Piauí | São Miguel Tapuio          | NA | NA | NA |
| <b>Tropical South America</b> | Brazil | Piauí | São Miguel da Baixa Grande | NA | NA | NA |
| <b>Tropical South America</b> | Brazil | Piauí | São Miguel do Fidalgo      | NA | NA | NA |
| <b>Tropical South America</b> | Brazil | Piauí | São Pedro do Piauí         | NA | NA | NA |
| <b>Tropical South America</b> | Brazil | Piauí | São Raimundo Nonato        | NA | NA | NA |
| <b>Tropical South America</b> | Brazil | Piauí | Tamboril do Piauí          | NA | NA | NA |
| <b>Tropical South America</b> | Brazil | Piauí | Tanque do Piauí            | NA | NA | NA |

|                               |        |       |                    |    |    |    |
|-------------------------------|--------|-------|--------------------|----|----|----|
| <b>Tropical South America</b> | Brazil | Piauí | Teresina           | NA | NA | NA |
| <b>Tropical South America</b> | Brazil | Piauí | União              | NA | NA | NA |
| <b>Tropical South America</b> | Brazil | Piauí | Uruçuí             | NA | NA | NA |
| <b>Tropical South America</b> | Brazil | Piauí | Valença do Piauí   | NA | NA | NA |
| <b>Tropical South America</b> | Brazil | Piauí | Vera Mendes        | NA | NA | NA |
| <b>Tropical South America</b> | Brazil | Piauí | Vila Nova do Piauí | NA | NA | NA |
| <b>Tropical South America</b> | Brazil | Piauí | Várzea Grande      | NA | NA | NA |
| <b>Tropical South America</b> | Brazil | Piauí | Wall Ferraz        | NA | NA | NA |
| <b>Tropical South America</b> | Brazil | Piauí | Água Branca        | NA | NA | NA |

270 **Supplementary Table 15: Anaemia fitted parameters**

271 Lower, median, and upper quantiles (percentiles 0.025, 0.50, 0.975) are displayed for the main parameters from the models by region. The fixed  
 272 effects covariates corresponding to the predicted ensemble rasters are shown in the first five columns, while fitted values for the spatiotemporal  
 273 field hyperparameters and the precisions (inverse variance) for our random effects are shown in the last five columns.

| Regions                           | Percentiles | int   | gam   | gbm   | lasso | Nominal Range | Nominal Variance | AR1 rho | Precision for Nugget | Precision for Country RE |
|-----------------------------------|-------------|-------|-------|-------|-------|---------------|------------------|---------|----------------------|--------------------------|
| North Africa                      | 0.025       | -0.38 | -0.12 | 0.32  | 0.39  | 0.04          | 0.29             | 0.09    | 4.25                 | 1213.18                  |
|                                   | 0.500       | -0.08 | 0.00  | 0.48  | 0.52  | 0.06          | 0.54             | 0.38    | 5.29                 | 12882.99                 |
|                                   | 0.975       | 0.22  | 0.12  | 0.64  | 0.64  | 0.10          | 1.10             | 0.65    | 6.50                 | 66780.16                 |
| Southern sub-Saharan Africa       | 0.025       | -0.25 | -0.17 | 0.11  | 0.52  | 0.05          | 0.16             | -0.46   | 12.74                | 1170.41                  |
|                                   | 0.500       | -0.10 | 0.01  | 0.32  | 0.68  | 0.08          | 0.26             | -0.20   | 18.42                | 12974.33                 |
|                                   | 0.975       | 0.04  | 0.19  | 0.52  | 0.83  | 0.12          | 0.42             | 0.18    | 27.02                | 67050.49                 |
| Eastern sub-Saharan Africa        | 0.025       | -0.08 | -0.01 | 0.08  | 0.67  | 0.04          | 0.10             | 0.14    | 4.77                 | 32.95                    |
|                                   | 0.500       | 0.03  | 0.10  | 0.18  | 0.72  | 0.05          | 0.15             | 0.47    | 5.21                 | 690.24                   |
|                                   | 0.975       | 0.13  | 0.21  | 0.29  | 0.77  | 0.07          | 0.20             | 0.64    | 5.68                 | 166402.50                |
| Western sub-Saharan Africa        | 0.025       | -0.25 | 0.05  | 0.13  | 0.50  | 0.04          | 0.19             | -0.23   | 7.69                 | 8.14                     |
|                                   | 0.500       | -0.09 | 0.18  | 0.26  | 0.55  | 0.06          | 0.26             | -0.07   | 8.51                 | 23.66                    |
|                                   | 0.975       | 0.06  | 0.32  | 0.40  | 0.61  | 0.08          | 0.34             | 0.12    | 9.54                 | 76.70                    |
| Oceania                           | 0.025       | -0.43 | -0.08 | 0.07  | 0.76  | 0.25          | 0.26             | -0.73   | 840.19               | 1276.53                  |
|                                   | 0.500       | 0.03  | 0.01  | 0.17  | 0.82  | 0.49          | 0.60             | -0.44   | 11331.49             | 13144.44                 |
|                                   | 0.975       | 0.48  | 0.11  | 0.26  | 0.87  | 1.07          | 1.57             | -0.01   | 63631.38             | 67062.79                 |
| Middle East                       | 0.025       | -0.50 | -0.10 | -0.07 | 0.70  | 0.17          | 0.00             | -0.50   | 5.47                 | 1072.96                  |
|                                   | 0.500       | -0.16 | 0.06  | 0.11  | 0.82  | 0.69          | 0.02             | 0.58    | 6.43                 | 13365.11                 |
|                                   | 0.975       | 0.18  | 0.23  | 0.30  | 0.95  | 2.90          | 0.19             | 0.97    | 7.54                 | 68517.94                 |
| Central America and the Caribbean | 0.025       | -0.66 | -0.07 | 0.28  | 0.59  | 0.04          | 0.29             | 0.11    | 4.46                 | 0.88                     |
|                                   | 0.500       | -0.15 | 0.00  | 0.36  | 0.65  | 0.06          | 0.44             | 0.40    | 4.99                 | 3.60                     |
|                                   | 0.975       | 0.36  | 0.06  | 0.43  | 0.71  | 0.09          | 0.68             | 0.66    | 5.57                 | 12.90                    |
|                                   | 0.025       | -0.15 | -0.19 | -0.16 | 0.55  | 0.06          | 0.00             | -0.94   | 2368.28              | 2090.13                  |

|                            |       |       |       |       |      |      |      |       |          |          |
|----------------------------|-------|-------|-------|-------|------|------|------|-------|----------|----------|
| Tropical South America     | 0.500 | -0.04 | 0.14  | 0.15  | 0.71 | 0.43 | 0.01 | -0.57 | 17070.20 | 16318.90 |
|                            | 0.975 | 0.06  | 0.47  | 0.45  | 0.88 | 3.88 | 0.10 | 0.53  | 93252.33 | 87946.98 |
| Andean South America       | 0.025 | -0.32 | -0.17 | 0.12  | 0.85 | 0.07 | 0.37 | -0.51 | 6.37     | 8.55     |
|                            | 0.500 | -0.11 | -0.09 | 0.21  | 0.88 | 0.08 | 0.51 | -0.38 | 7.07     | 86.75    |
|                            | 0.975 | 0.11  | -0.01 | 0.29  | 0.92 | 0.11 | 0.74 | -0.25 | 7.94     | 2459.14  |
| Central sub-Saharan Africa | 0.025 | -0.18 | -0.08 | -0.04 | 0.65 | 0.06 | 0.08 | -0.64 | 11.15    | 720.76   |
|                            | 0.500 | -0.06 | 0.10  | 0.13  | 0.77 | 0.09 | 0.18 | -0.23 | 16.84    | 10871.93 |
|                            | 0.975 | 0.06  | 0.28  | 0.30  | 0.89 | 0.15 | 0.38 | 0.23  | 24.57    | 63062.24 |
| South Asia                 | 0.025 | -0.37 | -0.14 | 0.26  | 0.35 | 0.03 | 0.30 | 0.36  | 8.68     | 1153.71  |
|                            | 0.500 | -0.21 | 0.00  | 0.46  | 0.54 | 0.04 | 0.44 | 0.75  | 19.38    | 13811.58 |
|                            | 0.975 | -0.05 | 0.15  | 0.66  | 0.72 | 0.05 | 0.62 | 0.94  | 42.84    | 69083.44 |
| Central Asia               | 0.025 | -0.14 | -0.06 | 0.14  | 0.72 | 0.08 | 0.34 | 0.05  | 4.86     | 8127.91  |
|                            | 0.500 | 0.06  | 0.02  | 0.22  | 0.76 | 0.10 | 0.52 | 0.10  | 4.92     | 15317.64 |
|                            | 0.975 | 0.26  | 0.10  | 0.30  | 0.80 | 0.16 | 0.96 | 0.18  | 4.95     | 23031.86 |
| Southeast Asia             | 0.025 | -0.23 | -0.06 | 0.00  | 0.47 | 0.05 | 0.18 | -0.76 | 1.50     | 1238.35  |
|                            | 0.500 | 0.09  | 0.17  | 0.23  | 0.60 | 0.10 | 0.39 | -0.26 | 1.69     | 14269.91 |
|                            | 0.975 | 0.40  | 0.39  | 0.47  | 0.73 | 0.19 | 0.89 | 0.48  | 1.85     | 70166.50 |
| East Asia                  | 0.025 | -0.88 | -0.02 | 0.12  | 0.45 | 0.02 | 0.07 | -0.37 | 7.89     | 0.57     |
|                            | 0.500 | -0.41 | 0.14  | 0.29  | 0.57 | 0.04 | 0.11 | 0.02  | 9.43     | 3.52     |
|                            | 0.975 | 0.07  | 0.30  | 0.46  | 0.70 | 0.06 | 0.18 | 0.36  | 11.77    | 19.02    |

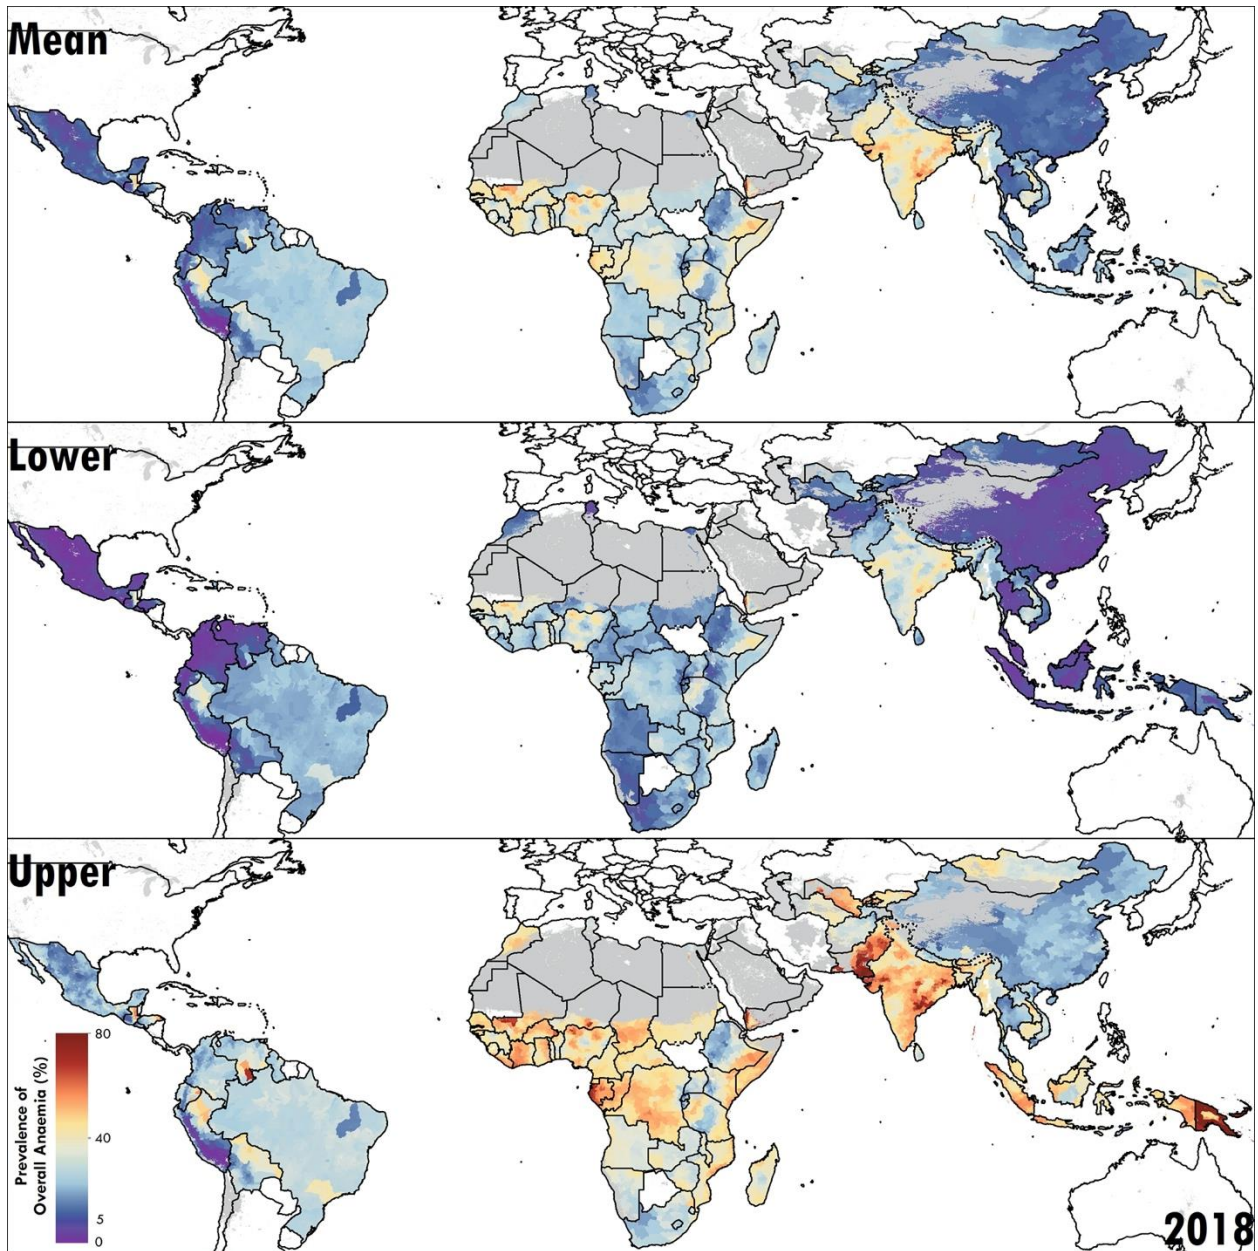

275  
276

277 **Supplementary Figure 10: Anaemia posterior means and upper and lower 95% uncertainty intervals**



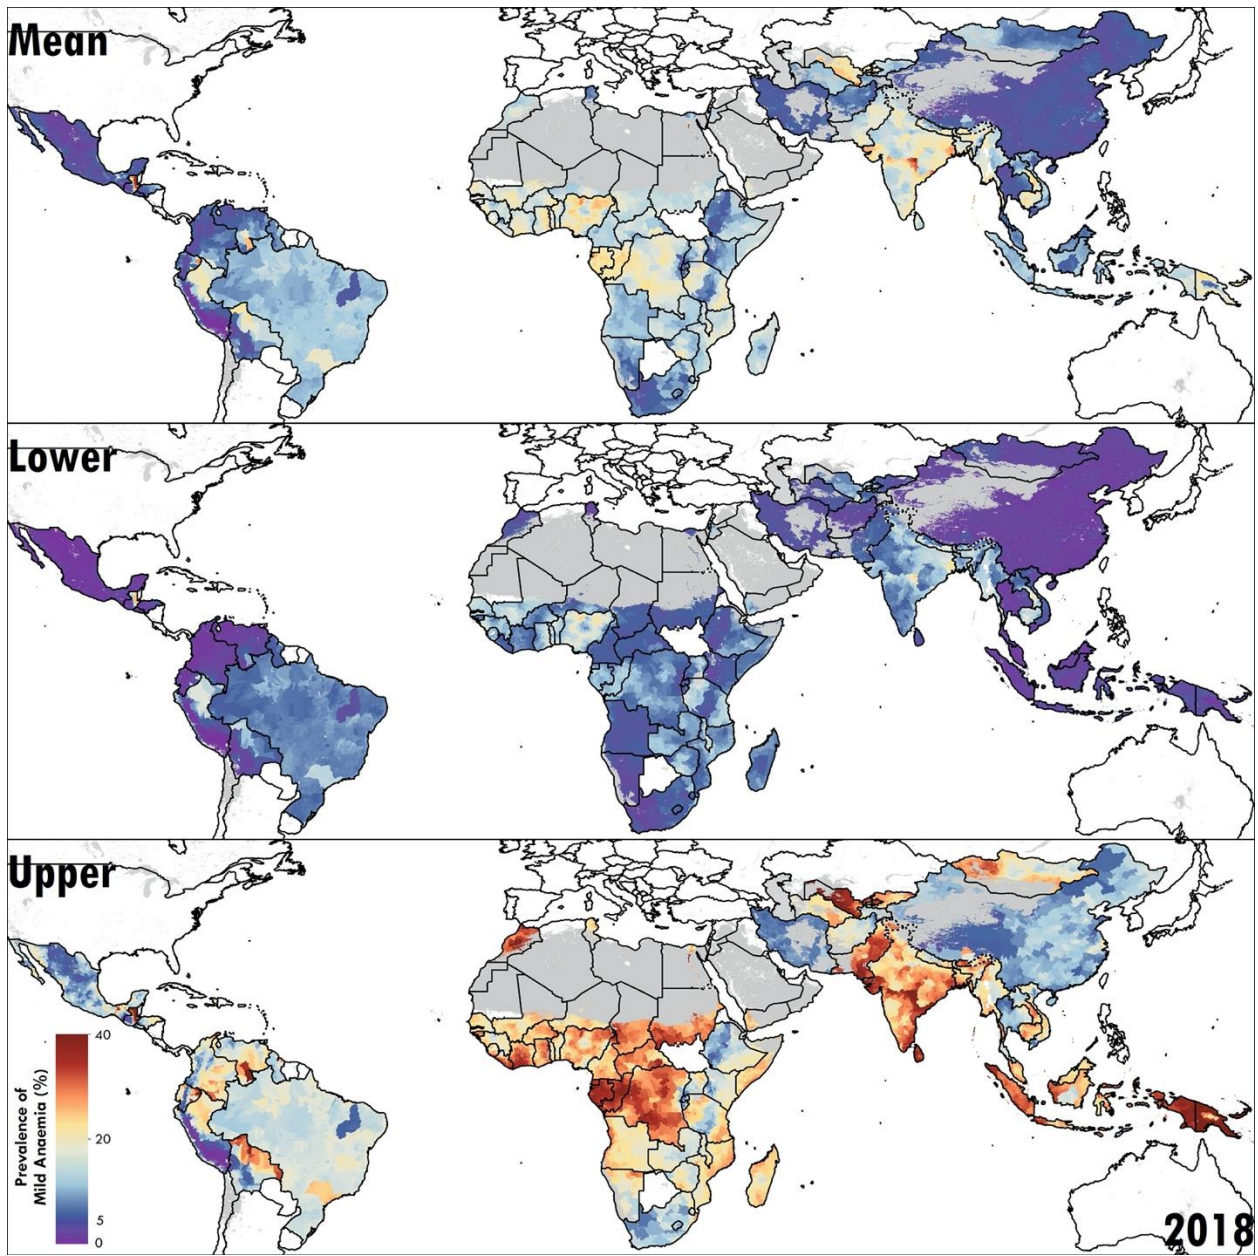

278

279 **Supplementary Figure 11: Mild anaemia posterior means and upper and lower 95% uncertainty**  
 280 **intervals**

281

282

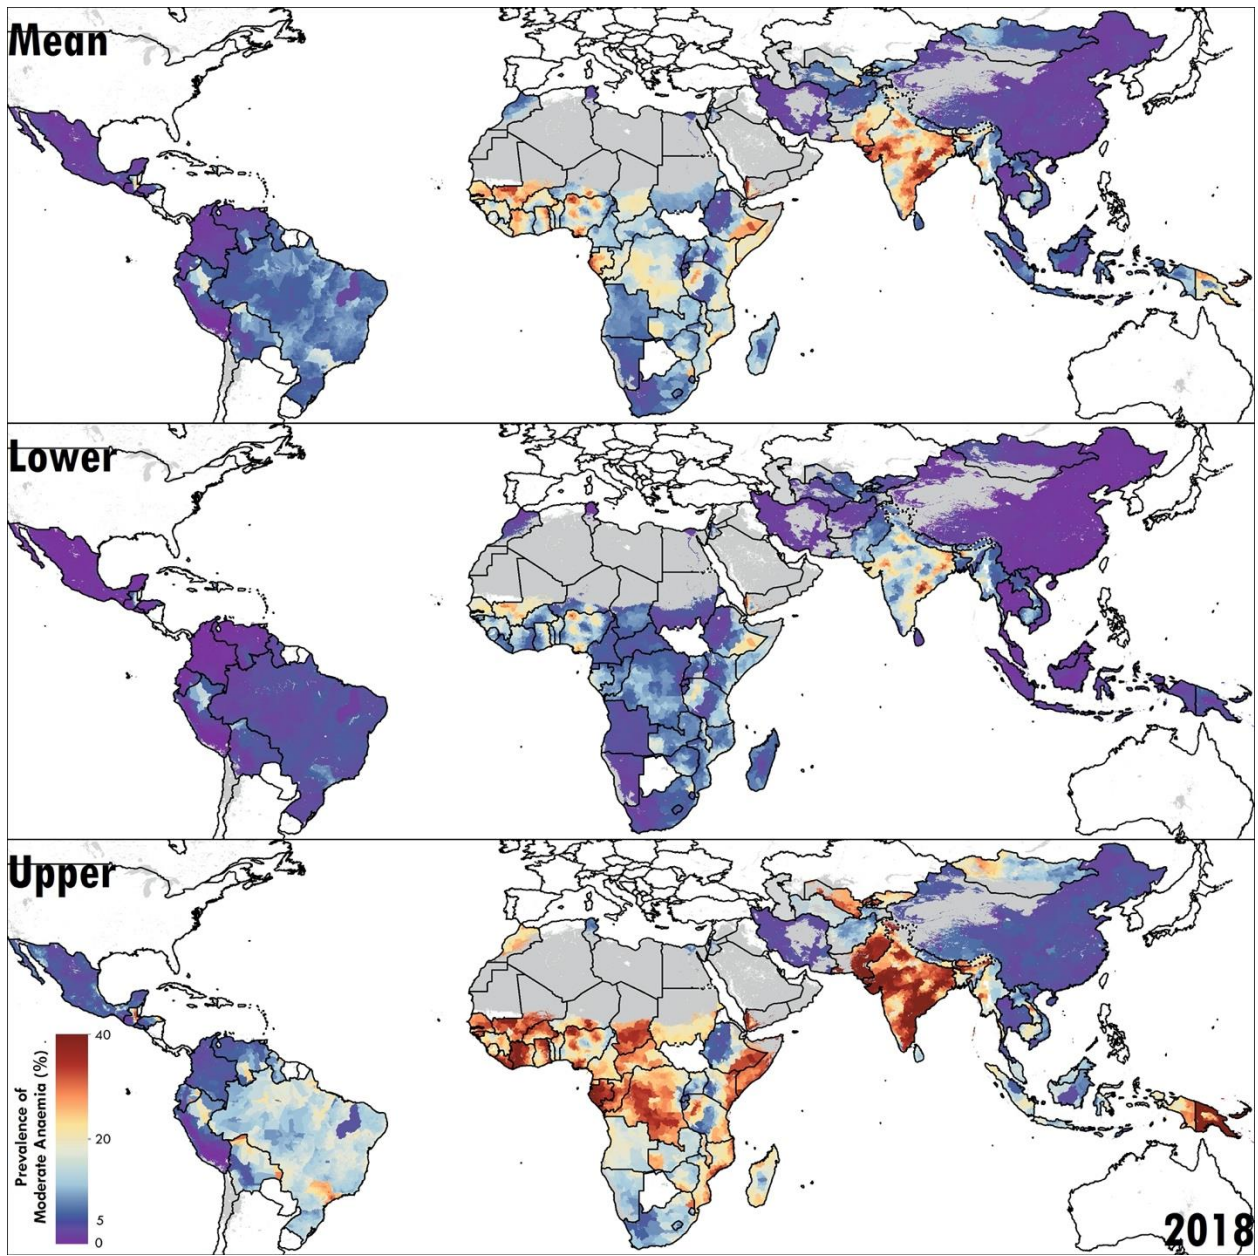

283

284 **Supplementary Figure 12: Moderate anaemia posterior means and upper and lower 95% uncertainty**  
 285 **intervals**

286

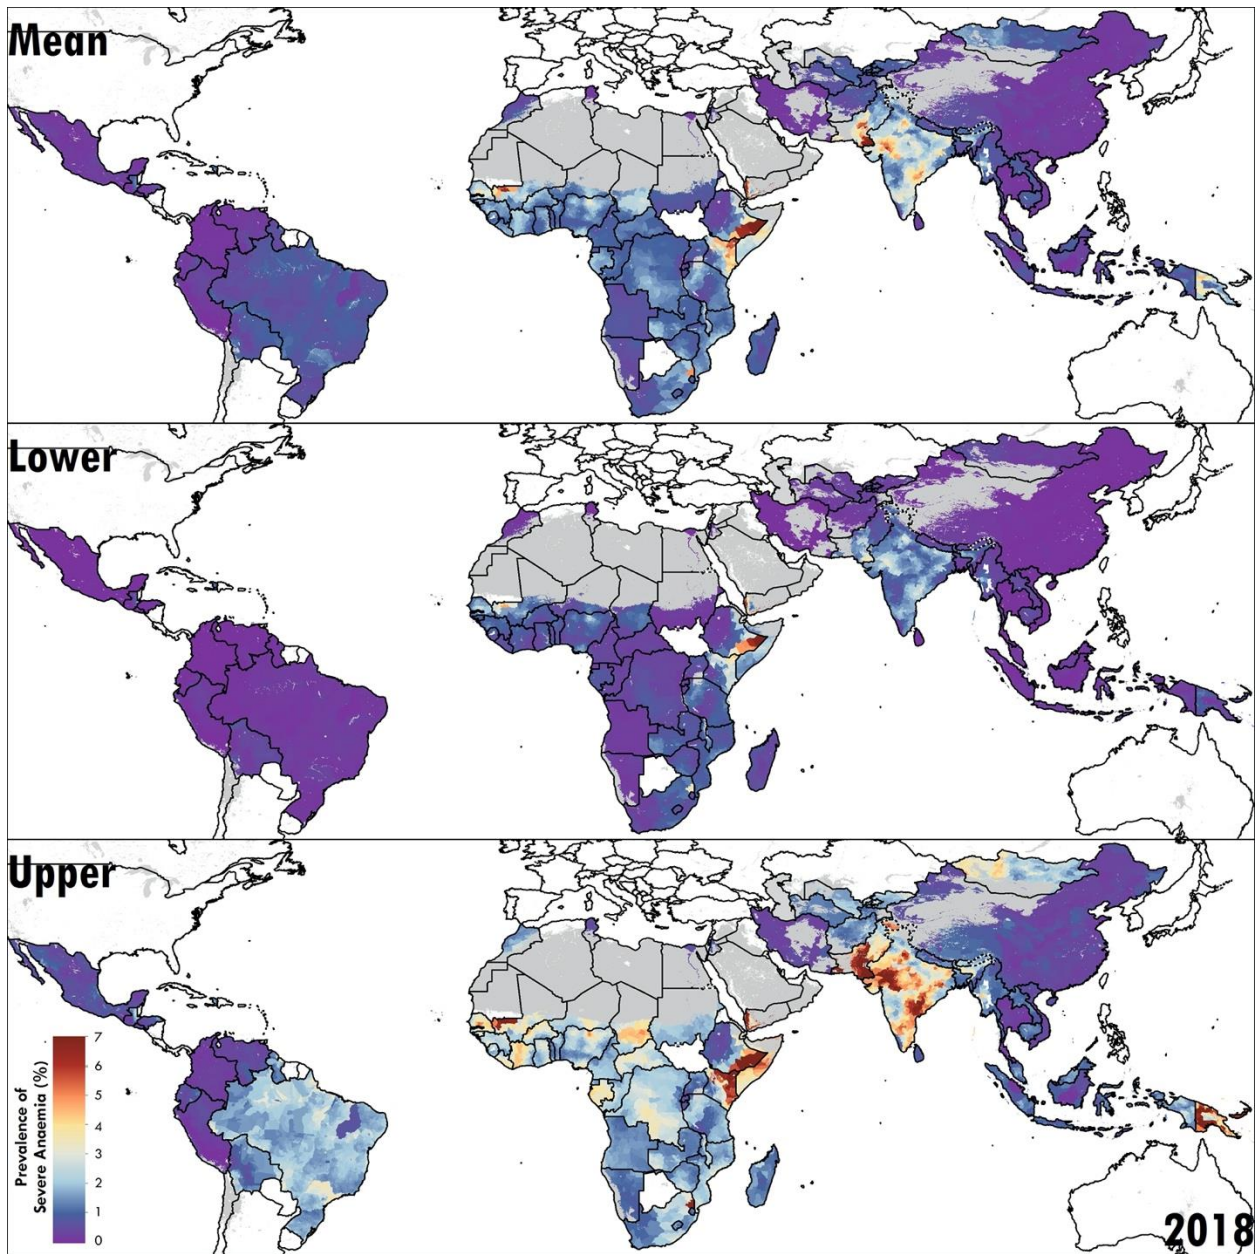

287

288

289

**Supplementary Figure 13: Severe anaemia posterior means and upper and lower 95% uncertainty intervals**

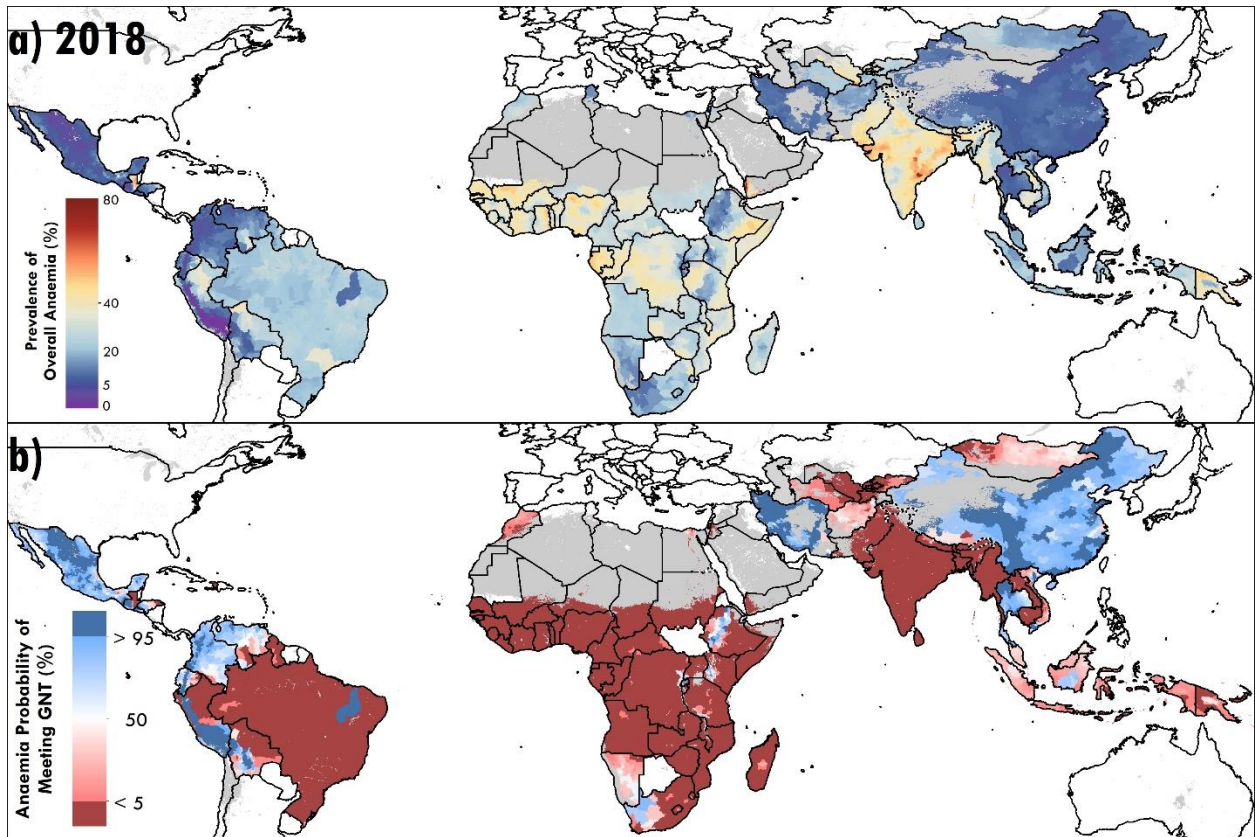

290  
 291  
 292  
 293  
 294

**Supplementary Figure 14: Prevalence for overall anaemia among WRA in 2018, and probability of achieving the WHO GNT for overall anaemia by 2018**

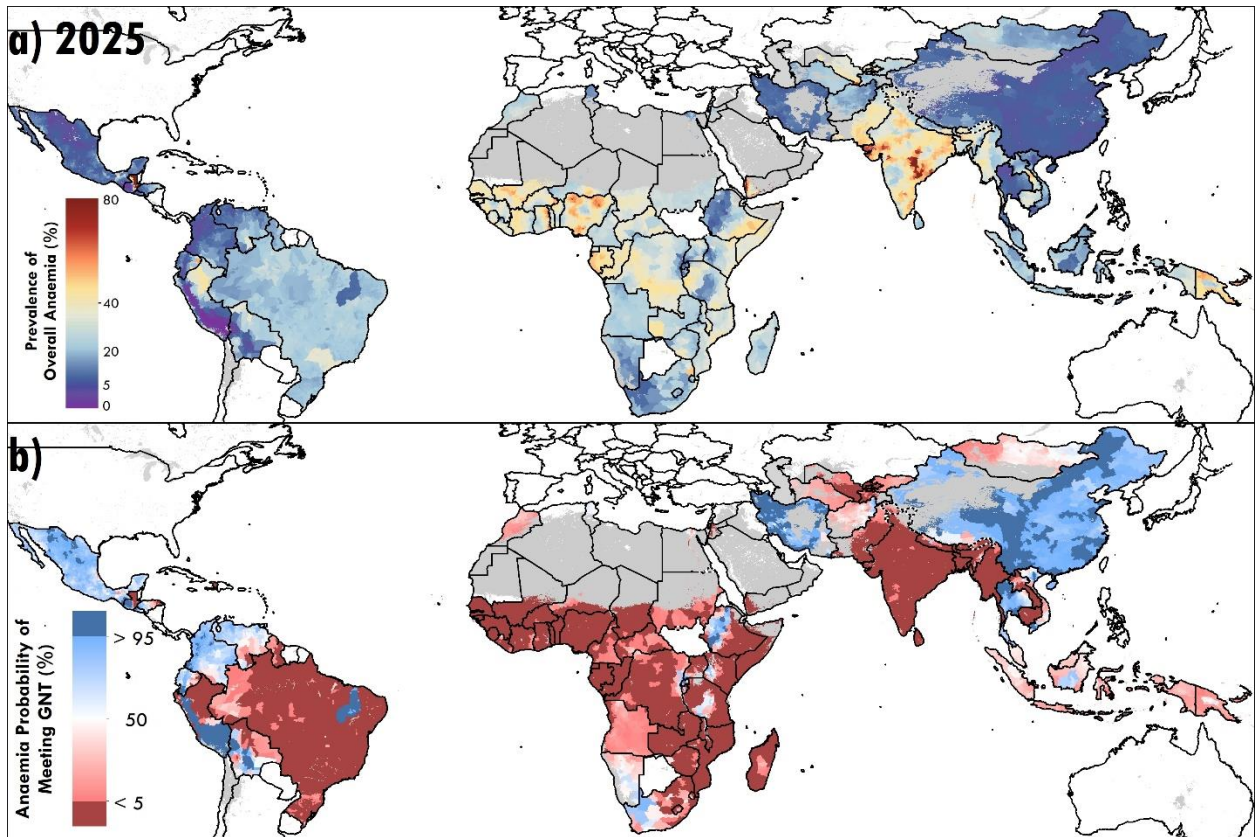

295

296

297

298

**Supplementary Figure 15: Prevalence for overall anaemia among WRA in 2025, and probability of achieving the WHO GNT for overall anaemia by 2025**

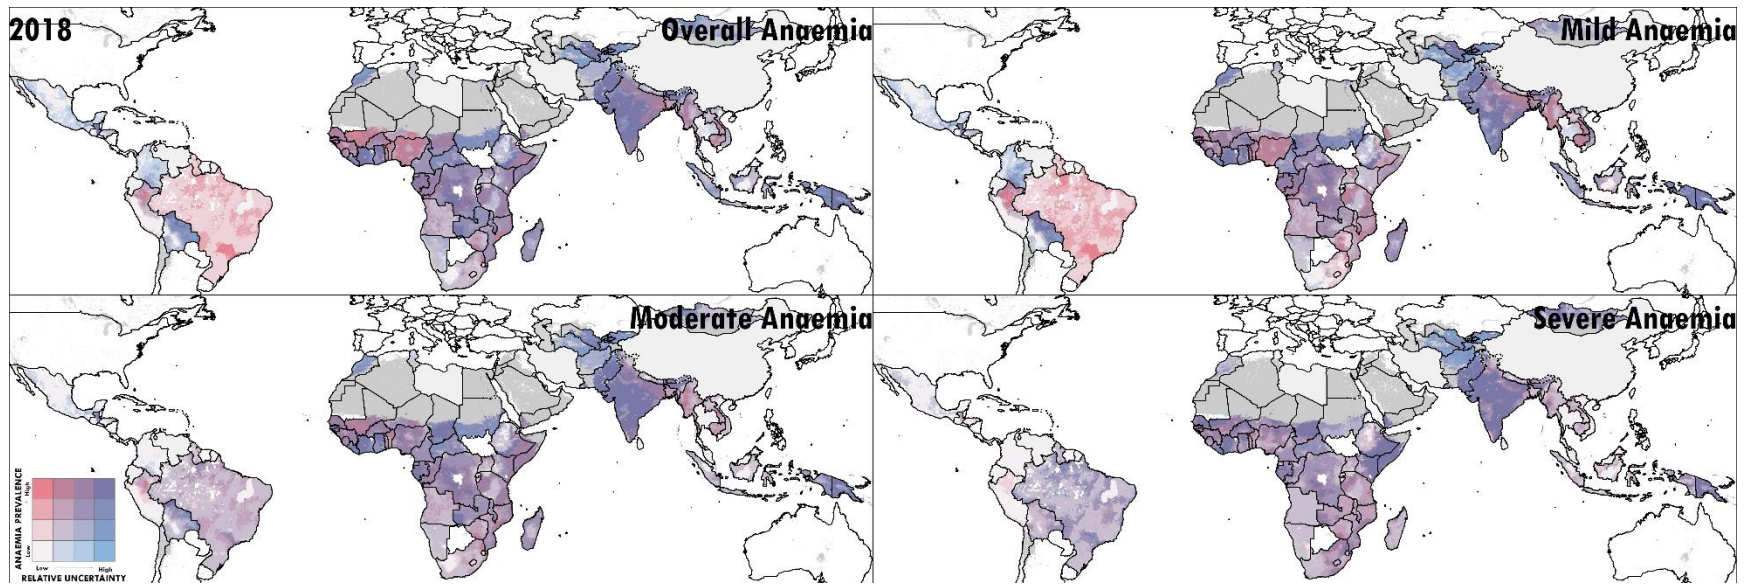

299

300

301 **Supplementary Figure 16: Overlapping population-weighted quartiles of overall anaemia and relative 95% uncertainty in 2018**

302 **6.0 Model validation**

303 *6.1 Anaemia validation metrics*

304 **Supplementary Table 16: Predictive metrics for anaemia aggregated to admin 0**

305 The out-of-sample (OOS) column indicates whether the metric was calculated using in-sample  
306 or out-of-sample predictions. Mean error, root-mean-squared-error (RMSE), correlation (Corr)  
307 and coefficient of variation (Cov) are in proportion.  
308

| Year | OOS   | Median SS | Mean err. | RMSE  | Corr. | 95% Cov. |
|------|-------|-----------|-----------|-------|-------|----------|
| 2000 | FALSE | 5364.000  | -0.008    | 0.014 | 0.998 | 0.946    |
| 2001 | FALSE | 958.500   | 0.001     | 0.035 | 0.989 | 0.992    |
| 2002 | FALSE | 1683.000  | -0.006    | 0.023 | 0.981 | 0.960    |
| 2003 | FALSE | 5370.000  | -0.006    | 0.008 | 0.998 | 0.983    |
| 2004 | FALSE | 2730.000  | -0.005    | 0.008 | 0.998 | 0.995    |
| 2005 | FALSE | 4133.500  | 0.001     | 0.011 | 0.998 | 0.989    |
| 2006 | FALSE | 4522.500  | -0.009    | 0.046 | 0.977 | 0.904    |
| 2007 | FALSE | 1750.000  | 0.007     | 0.017 | 0.993 | 0.921    |
| 2008 | FALSE | 4768.000  | -0.008    | 0.041 | 0.981 | 0.994    |
| 2009 | FALSE | 3933.000  | -0.005    | 0.015 | 0.991 | 0.979    |
| 2010 | FALSE | 7237.500  | -0.002    | 0.010 | 0.998 | 0.989    |
| 2011 | FALSE | 7024.500  | 0.001     | 0.012 | 0.996 | 0.987    |
| 2012 | FALSE | 5182.500  | 0.001     | 0.008 | 0.999 | 0.992    |
| 2013 | FALSE | 6195.500  | -0.001    | 0.006 | 1.000 | 0.988    |
| 2014 | FALSE | 3426.000  | 0.006     | 0.024 | 0.987 | 0.986    |
| 2015 | FALSE | 12935.000 | -0.001    | 0.005 | 0.999 | 0.981    |
| 2016 | FALSE | 5231.080  | -0.009    | 0.018 | 0.997 | 0.994    |
| 2017 | FALSE | 9407.500  | 0.000     | 0.006 | 0.997 | 0.990    |
| 2018 | FALSE | 14502.000 | 0.003     | 0.006 | 1.000 | 0.996    |

309  
310  
311  
312  
313  
314  
315  
316  
317

**Supplementary Table 17: Predictive metrics for anaemia aggregated to admin 1**

| Year | OOS   | Median SS | Mean err. | RMSE  | Corr. | 95% Cov. |
|------|-------|-----------|-----------|-------|-------|----------|
| 2000 | FALSE | 109.000   | -0.008    | 0.032 | 0.988 | 0.946    |
| 2001 | FALSE | 236.000   | 0.001     | 0.040 | 0.986 | 0.995    |
| 2002 | FALSE | 597.484   | -0.006    | 0.033 | 0.988 | 0.959    |
| 2003 | FALSE | 571.000   | -0.006    | 0.025 | 0.991 | 0.982    |
| 2004 | FALSE | 328.000   | -0.005    | 0.023 | 0.988 | 0.995    |
| 2005 | FALSE | 417.500   | 0.001     | 0.023 | 0.992 | 0.989    |
| 2006 | FALSE | 37.000    | -0.009    | 0.057 | 0.959 | 0.904    |
| 2007 | FALSE | 312.000   | 0.007     | 0.025 | 0.986 | 0.914    |
| 2008 | FALSE | 406.000   | -0.008    | 0.048 | 0.976 | 0.994    |
| 2009 | FALSE | 363.000   | -0.005    | 0.039 | 0.969 | 0.980    |
| 2010 | FALSE | 350.500   | -0.002    | 0.028 | 0.986 | 0.989    |
| 2011 | FALSE | 298.500   | 0.001     | 0.022 | 0.991 | 0.987    |
| 2012 | FALSE | 683.500   | 0.001     | 0.021 | 0.995 | 0.992    |
| 2013 | FALSE | 385.000   | -0.001    | 0.019 | 0.995 | 0.989    |
| 2014 | FALSE | 507.000   | 0.006     | 0.028 | 0.987 | 0.985    |
| 2015 | FALSE | 1196.000  | -0.001    | 0.008 | 0.998 | 0.981    |
| 2016 | FALSE | 64.000    | -0.009    | 0.031 | 0.989 | 0.994    |
| 2017 | FALSE | 716.500   | 0.000     | 0.023 | 0.978 | 0.989    |
| 2018 | FALSE | 609.500   | 0.003     | 0.012 | 0.998 | 0.997    |

319  
320  
321  
322  
323  
324  
325  
326  
327  
328  
329  
330  
331  
332  
333  
334  
335  
336



337

**Supplementary Table 18: Predictive metrics for anaemia aggregated to admin 2**

| <b>Year</b> | <b>OOS</b> | <b>Median SS</b> | <b>Mean err.</b> | <b>RMSE</b> | <b>Corr.</b> | <b>95% Cov.</b> |
|-------------|------------|------------------|------------------|-------------|--------------|-----------------|
| <b>2000</b> | FALSE      | 27.648           | -0.008           | 0.059       | 0.960        | 0.921           |
| <b>2001</b> | FALSE      | 48.675           | 0.001            | 0.056       | 0.972        | 0.994           |
| <b>2002</b> | FALSE      | 271.000          | -0.006           | 0.044       | 0.984        | 0.959           |
| <b>2003</b> | FALSE      | 38.000           | -0.006           | 0.048       | 0.968        | 0.984           |
| <b>2004</b> | FALSE      | 1.841            | -0.005           | 0.039       | 0.968        | 0.996           |
| <b>2005</b> | FALSE      | 81.969           | 0.001            | 0.041       | 0.976        | 0.989           |
| <b>2006</b> | FALSE      | 1.766            | -0.009           | 0.070       | 0.937        | 0.905           |
| <b>2007</b> | FALSE      | 38.995           | 0.007            | 0.044       | 0.958        | 0.927           |
| <b>2008</b> | FALSE      | 33.292           | -0.008           | 0.062       | 0.962        | 0.992           |
| <b>2009</b> | FALSE      | 61.000           | -0.005           | 0.052       | 0.952        | 0.981           |
| <b>2010</b> | FALSE      | 38.217           | -0.002           | 0.045       | 0.967        | 0.988           |
| <b>2011</b> | FALSE      | 32.000           | 0.001            | 0.049       | 0.962        | 0.986           |
| <b>2012</b> | FALSE      | 68.643           | 0.001            | 0.035       | 0.987        | 0.993           |
| <b>2013</b> | FALSE      | 32.000           | -0.001           | 0.055       | 0.961        | 0.988           |
| <b>2014</b> | FALSE      | 40.000           | 0.006            | 0.060       | 0.953        | 0.987           |
| <b>2015</b> | FALSE      | 622.000          | -0.001           | 0.025       | 0.986        | 0.981           |
| <b>2016</b> | FALSE      | 25.639           | -0.009           | 0.044       | 0.980        | 0.993           |
| <b>2017</b> | FALSE      | 110.000          | 0.000            | 0.041       | 0.940        | 0.989           |
| <b>2018</b> | FALSE      | 31.000           | 0.003            | 0.042       | 0.978        | 0.996           |

338

339

340

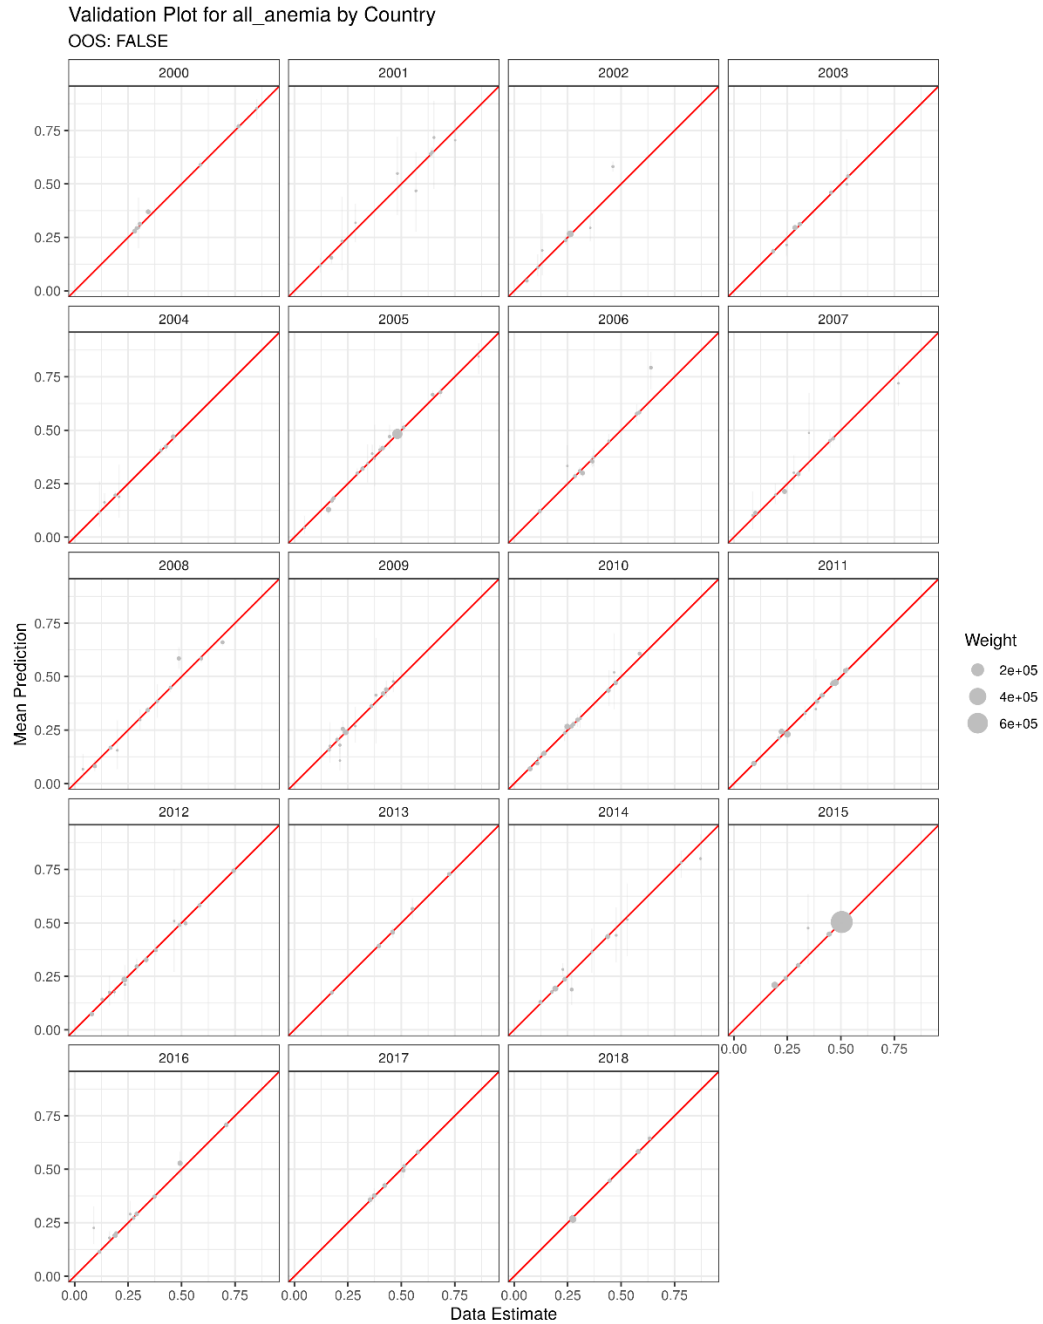

341  
 342

343 **Supplementary Figure 17: Anaemia admin 0 aggregation in-sample**

344 Comparison of in-sample anaemia predictions aggregated to admin 0 with 95% uncertainty  
 345 intervals plotted against admin 0 aggregated data observations.

346

Validation Plot for all\_anemia by Admin 1  
OOS: FALSE

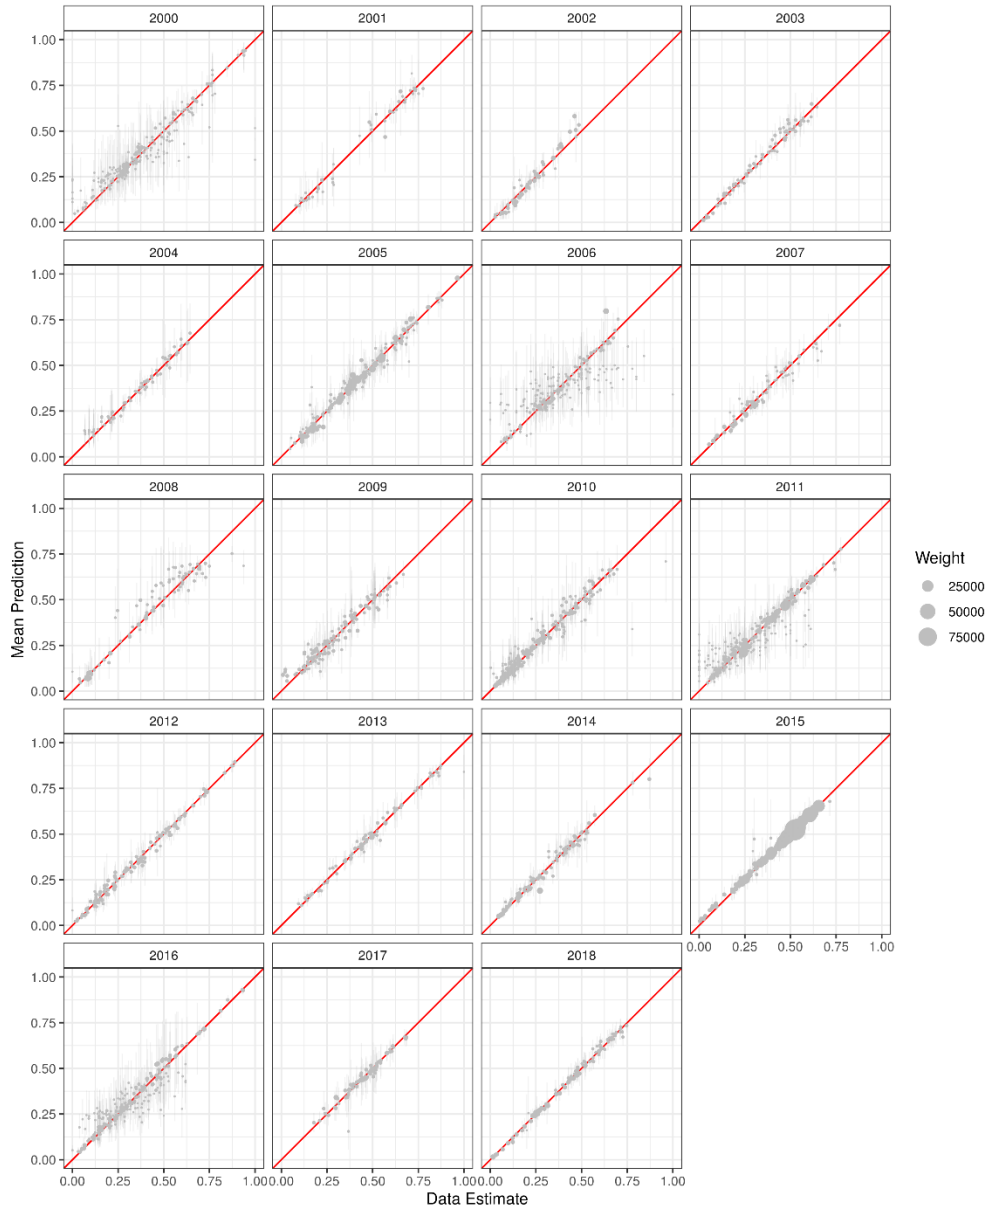

347  
348

**Supplementary Figure 18: Anaemia admin 1 aggregation in-sample**

349  
350  
351  
352  
353  
354  
355  
356  
357  
358  
359

Comparison of in-sample anaemia predictions aggregated to admin 1 with 95% uncertainty intervals plotted against admin 1 aggregated data observations.

Validation Plot for all\_anemia by Admin 2  
OOS: FALSE

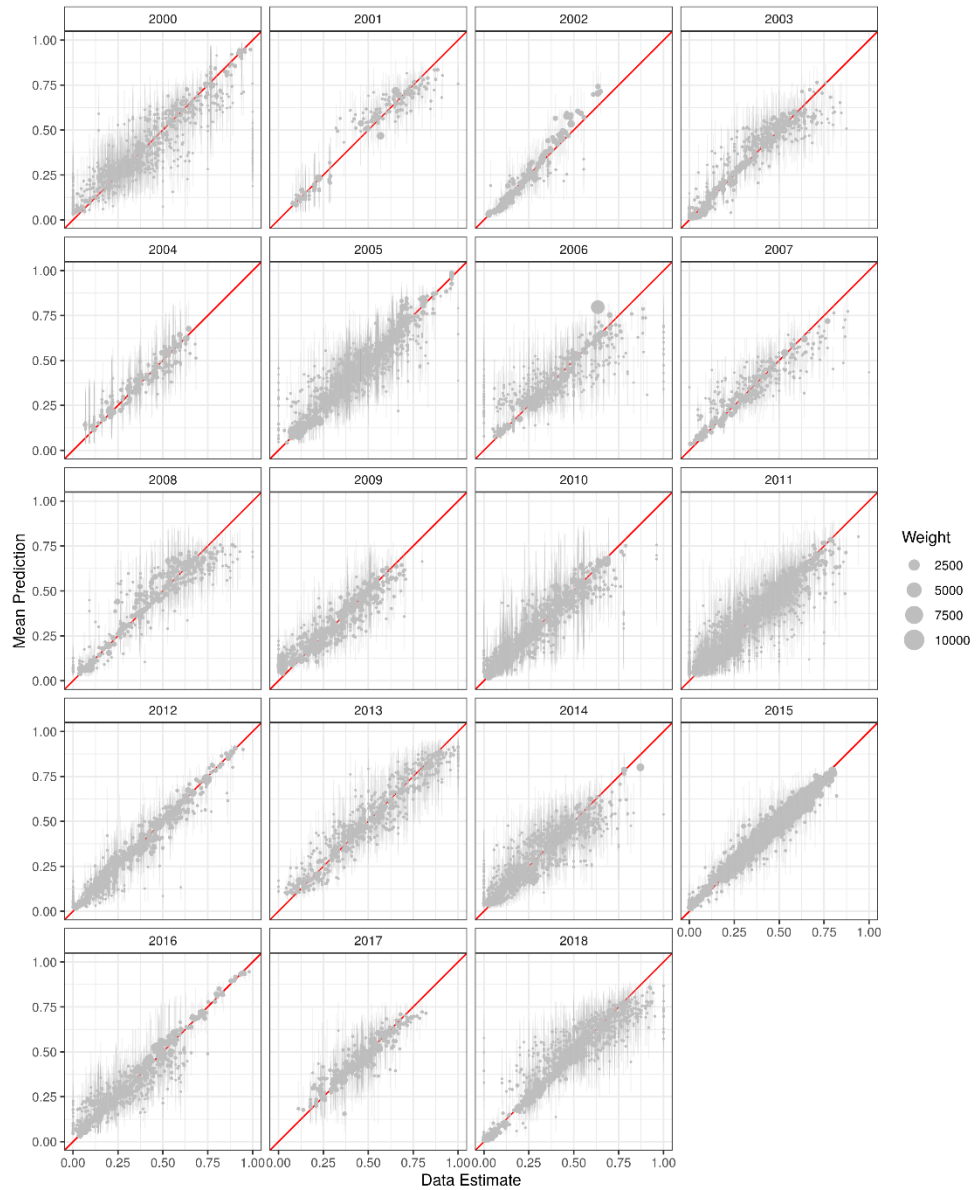

360  
361  
362  
363  
364  
365  
366  
367  
368  
369  
370

**Supplementary Figure 19: Anaemia admin 2 aggregation in-sample**

Comparison of in-sample anaemia predictions aggregated to admin 2 with 95% uncertainty intervals plotted against admin 2 aggregated data observations.

371 6.2 Anaemia sensitivity analysis

372

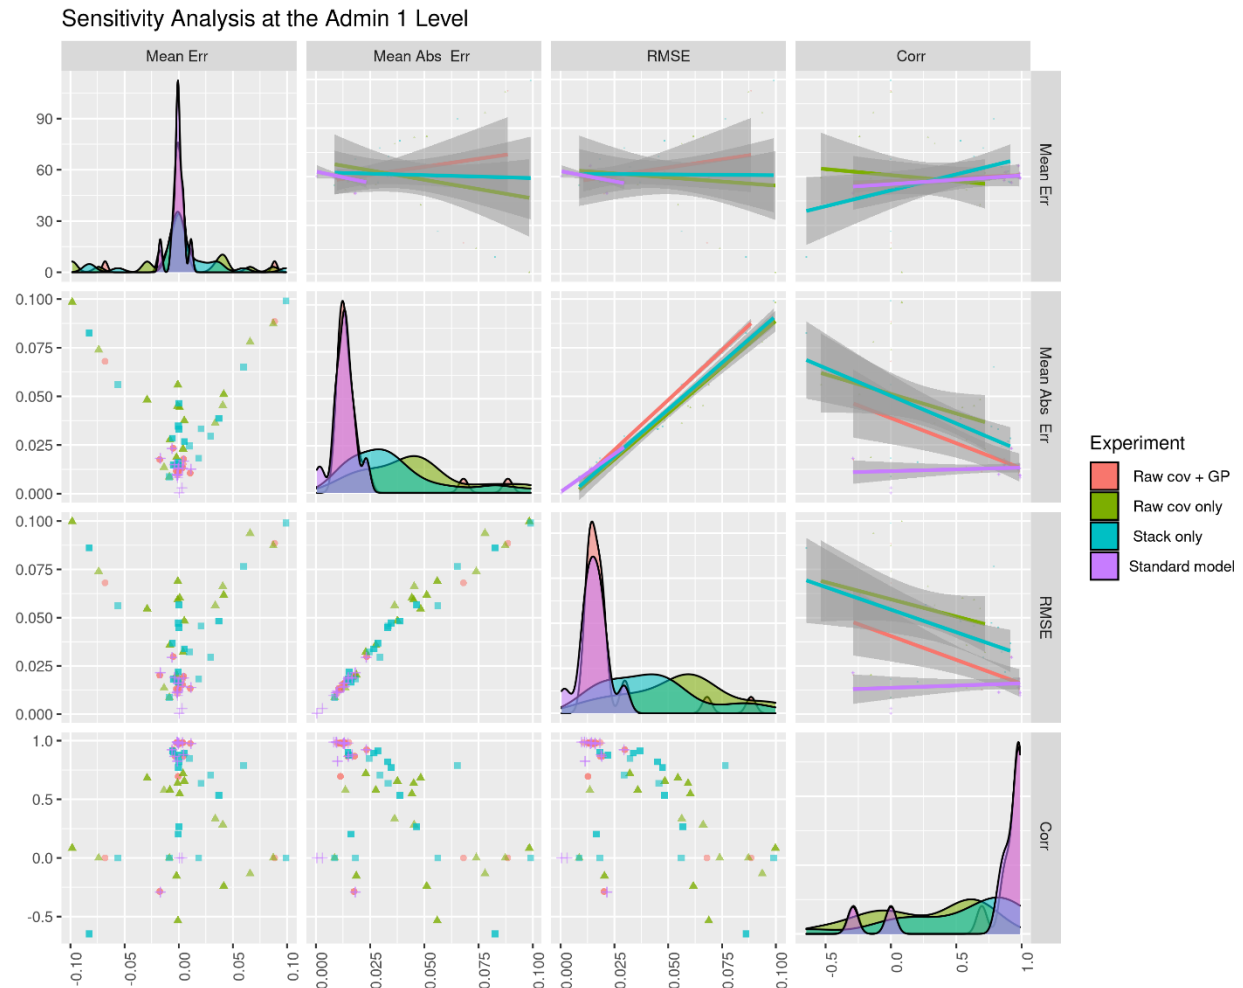

373

374 **Supplementary Figure 20: Sensitivity analysis results admin 1 level**

375

376

Sensitivity Analysis at the Admin 2 Level

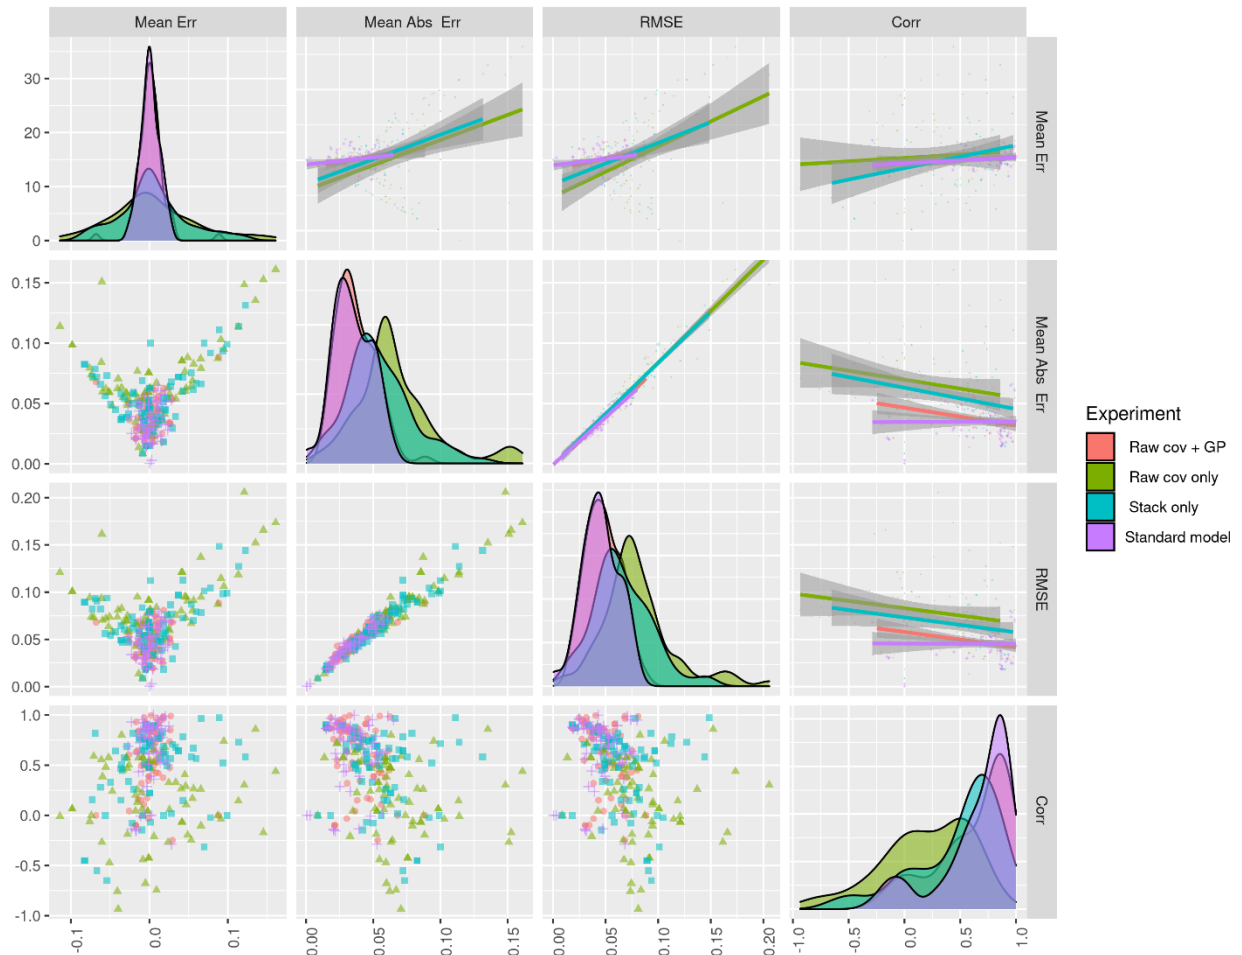

377  
378

Supplementary Figure 21: Sensitivity analysis results admin 2 level

379  
380  
381  
382  
383  
384  
385  
386  
387  
388  
389

390 **7.0 Supplementary references**

391

392 1. Dicker, D. *et al.* Global, regional, and national age-sex-specific mortality and life expectancy, 1950–

393 2017: a systematic analysis for the Global Burden of Disease Study 2017. *Lancet* **392**, 1684–1735

394 (2018).

395 2. Roberts, D. R. *et al.* Cross-validation strategies for data with temporal, spatial, hierarchical, or

396 phylogenetic structure. *Ecography* n/a-n/a (2017) doi:10.1111/ecog.02881.

397 3. Global Administrative Areas (GADM). GADM database of global administrative areas.

398 <http://www.gadm.org> (2018).

399
